# Supplementary material
Source: Research Square preprint supplement (doi:10.21203/rs.3.rs-9564432/v1)
Supplement: Supplementary file 1 [file 2d66254b4aa97aa86f0d14c3.docx]

Table S5. Annotated list of the 66 retained compounds after primary screening.

| Compound | Clinical Information | Target | Pathway |
| --- | --- | --- | --- |
| Cucurbitacin B | No Development Reported | Apoptosis; Autophagy; COX; Endogenous Metabolite; HIF/HIF Prolyl-Hydroxylase; Integrin; ROS Kinase | Apoptosis; Autophagy; Cytoskeleton; Immunology/Inflammation; Metabolic Enzyme/Protease; Protein Tyrosine Kinase/RTK |
| Mitoxantrone | Launched | Apoptosis; Endogenous Metabolite; Orthopoxvirus; PKC; Topoisomerase | Anti-infection; Apoptosis; Cell Cycle/DNA Damage; Epigenetics; Metabolic Enzyme/Protease; TGF-beta/Smad |
| SM1-71 | No Development Reported | FGFR; LIM Kinase (LIMK); MAP3K; Ribosomal S6 Kinase (RSK); Src | Cell Cycle/DNA Damage; MAPK/ERK Pathway; Protein Tyrosine Kinase/RTK |
| BRD9757 | No Development Reported | HDAC | Cell Cycle/DNA Damage; Epigenetics |
| Sapanisertib | Phase 2 | Autophagy; mTOR | Autophagy; PI3K/Akt/mTOR |
| GSK1059615 | Phase 1 | Apoptosis; mTOR; PI3K | Apoptosis; PI3K/Akt/mTOR |
| Mitoxantrone | Launched | Apoptosis; Endogenous Metabolite; Orthopoxvirus; PKC; Topoisomerase | Anti-infection; Apoptosis; Cell Cycle/DNA Damage; Epigenetics; Metabolic Enzyme/Protease; TGF-beta/Smad |
| WYE-132 | No Development Reported | Apoptosis; mTOR | Apoptosis; PI3K/Akt/mTOR |
| Staurosporine | No Development Reported | Antibiotic; Apoptosis; Bacterial; Fungal; PKA; PKC | Anti-infection; Apoptosis; Epigenetics; Stem Cell/Wnt; TGF-beta/Smad |
| Gamabufotalin | No Development Reported | VEGFR | Protein Tyrosine Kinase/RTK |
| (E/Z)-Zotiraciclib | No Development Reported | CDK; FLT3; JAK | Cell Cycle/DNA Damage; Epigenetics; JAK/STAT Signaling; Protein Tyrosine Kinase/RTK; Stem Cell/Wnt |
| ON-013100 | No Development Reported | CDK | Cell Cycle/DNA Damage |
| FN-1501 | Phase 1 | CDK; FLT3 | Cell Cycle/DNA Damage; Protein Tyrosine Kinase/RTK |
| Dacinostat | Phase 3 | Autophagy; HDAC | Autophagy; Cell Cycle/DNA Damage; Epigenetics |
| Dactolisib | Phase 3 | Autophagy; mTOR; PI3K | Autophagy; PI3K/Akt/mTOR |
| mTOR inhibitor-3 | No Development Reported | mTOR | PI3K/Akt/mTOR |
| HDACs/mTOR Inhibitor 1 | No Development Reported | Apoptosis; HDAC; mTOR | Apoptosis; Cell Cycle/DNA Damage; Epigenetics; PI3K/Akt/mTOR |
| PIK-75 | No Development Reported | Apoptosis; DNA-PK; PI3K | Apoptosis; Cell Cycle/DNA Damage; PI3K/Akt/mTOR |
| CDDD11-8 | No Development Reported | CDK; FLT3 | Cell Cycle/DNA Damage; Protein Tyrosine Kinase/RTK |
| Sangivamycin | No Development Reported | Nucleoside Antimetabolite/Analog; PKC | Cell Cycle/DNA Damage; Epigenetics; TGF-beta/Smad |
| Quisinostat | Phase 2 | Apoptosis; Autophagy; HDAC | Apoptosis; Autophagy; Cell Cycle/DNA Damage; Epigenetics |
| BGT226 | Phase 2 | Apoptosis; Autophagy; mTOR; PI3K | Apoptosis; Autophagy; PI3K/Akt/mTOR |
| Rigosertib | Phase 3 | Apoptosis; PI3K; Polo-like Kinase (PLK) | Apoptosis; Cell Cycle/DNA Damage; PI3K/Akt/mTOR |
| MC1742 | No Development Reported | Apoptosis; HDAC | Apoptosis; Cell Cycle/DNA Damage; Epigenetics |
| PF-04979064 | No Development Reported | mTOR; PI3K | PI3K/Akt/mTOR |
| MAX-40279 | Phase 2 | FGFR; FLT3 | Protein Tyrosine Kinase/RTK |
| AT7519 | Phase 2 | Apoptosis; CDK | Apoptosis; Cell Cycle/DNA Damage |
| AT9283 | Phase 3 | Apoptosis; Aurora Kinase; Autophagy; Bcr-Abl; FLT3; JAK | Apoptosis; Autophagy; Cell Cycle/DNA Damage; Epigenetics; JAK/STAT Signaling; Protein Tyrosine Kinase/RTK; Stem Cell/Wnt |
| Picropodophyllin | Phase 2 | Apoptosis; IGF-1R | Apoptosis; Protein Tyrosine Kinase/RTK |
| PF-04691502 | Phase 2 | Autophagy; mTOR; PI3K | Autophagy; PI3K/Akt/mTOR |
| Torin 2 | No Development Reported | Apoptosis; Autophagy; DNA-PK; mTOR | Apoptosis; Autophagy; Cell Cycle/DNA Damage; PI3K/Akt/mTOR |
| AZD3147 | No Development Reported | mTOR | PI3K/Akt/mTOR |
| PF 477736 | Phase 1 | Aurora Kinase; CDK; c-Fms; Checkpoint Kinase (Chk); FGFR; FLT3; RET; Src; VEGFR | Cell Cycle/DNA Damage; Epigenetics; Protein Tyrosine Kinase/RTK |
| PQR620 | No Development Reported | mTOR | PI3K/Akt/mTOR |
| Omipalisib | Phase 1 | Autophagy; mTOR; PI3K | Autophagy; PI3K/Akt/mTOR |
| M344 | No Development Reported | HDAC | Cell Cycle/DNA Damage; Epigenetics |
| CC-115 (hydrochloride) | Phase 1 | DNA-PK; mTOR | Cell Cycle/DNA Damage; PI3K/Akt/mTOR |
| KTC1101 | No Development Reported | Akt; mTOR; PI3K | PI3K/Akt/mTOR |
| MAX-40279(hemiadipate) | Phase 2 | FGFR; FLT3 | Protein Tyrosine Kinase/RTK |
| Apitolisib | Phase 2 | Apoptosis; mTOR; PI3K | Apoptosis; PI3K/Akt/mTOR |
| Quinacrine (hydrochloride hydrate) | Phase 2 | Apoptosis; Autophagy; Mitophagy; Parasite | Anti-infection; Apoptosis; Autophagy |
| Toyocamycin | No Development Reported | Antibiotic; Apoptosis; CDK; Fungal; IRE1 | Anti-infection; Apoptosis; Cell Cycle/DNA Damage |
| Samotolisib | Phase 2 | Autophagy; DNA-PK; mTOR; PI3K | Autophagy; Cell Cycle/DNA Damage; PI3K/Akt/mTOR |
| SKLB-23bb | No Development Reported | HDAC | Cell Cycle/DNA Damage; Epigenetics |
| Scriptaid | No Development Reported | Apoptosis; Autophagy; HDAC; Influenza Virus | Anti-infection; Apoptosis; Autophagy; Cell Cycle/DNA Damage; Epigenetics |
| Martinostat | No Development Reported | HDAC | Cell Cycle/DNA Damage; Epigenetics |
| Mefatinib | No Development Reported | c-Met/HGFR | Protein Tyrosine Kinase/RTK |
| Givinostat | Launched | HDAC | Cell Cycle/DNA Damage; Epigenetics |
| Cenisertib | Phase 1 | Akt; Aurora Kinase; Bcr-Abl; FLT3; STAT | Cell Cycle/DNA Damage; Epigenetics; JAK/STAT Signaling; PI3K/Akt/mTOR; Protein Tyrosine Kinase/RTK; Stem Cell/Wnt |
| MPT0B390 | No Development Reported | HDAC | Cell Cycle/DNA Damage; Epigenetics |
| LMK-235 | No Development Reported | HDAC | Cell Cycle/DNA Damage; Epigenetics |
| Belinostat | Launched | Autophagy; HDAC | Autophagy; Cell Cycle/DNA Damage; Epigenetics |
| FLT3-IN-3 | No Development Reported | FLT3 | Protein Tyrosine Kinase/RTK |
| NSC622608 | No Development Reported | PD-1/PD-L1 | Immunology/Inflammation |
| Flavopiridol | Phase 2 | Apoptosis; Autophagy; CDK; HIV | Anti-infection; Apoptosis; Autophagy; Cell Cycle/DNA Damage |
| Azenosertib | Phase 2 | Wee1 | Cell Cycle/DNA Damage |
| Vorinostat | Launched | Apoptosis; Autophagy; Filovirus; HDAC; HPV; Mitophagy | Anti-infection; Apoptosis; Autophagy; Cell Cycle/DNA Damage; Epigenetics |
| Buparlisib | Phase 3 | Apoptosis; PI3K | Apoptosis; PI3K/Akt/mTOR |
| MC180295 | No Development Reported | CDK | Cell Cycle/DNA Damage |
| FGFR2-IN-1 | No Development Reported | FGFR | Protein Tyrosine Kinase/RTK |
| Naquotinib | Phase 3 | EGFR | JAK/STAT Signaling; Protein Tyrosine Kinase/RTK |
| ASP5878 | Phase 1 | FGFR | Protein Tyrosine Kinase/RTK |
| Milciclib | Phase 2 | Autophagy; CDK | Autophagy; Cell Cycle/DNA Damage |
| HDAC-IN-40 | No Development Reported | HDAC | Cell Cycle/DNA Damage; Epigenetics |
| Midostaurin | Launched | Apoptosis; c-Kit; NO Synthase; PKC; VEGFR | Apoptosis; Epigenetics; Immunology/Inflammation; Protein Tyrosine Kinase/RTK; TGF-beta/Smad |
| GSK3117391 | Phase 1 | HDAC | Cell Cycle/DNA Damage; Epigenetics |
