# Supplementary material
Source: Research Square preprint supplement (doi:10.21203/rs.3.rs-9564432/v1)
Supplement: Supplementary file 2 [file 4dfb1453bfd462e88d897819.pdf]

# Microplate Layout

Anti-Brain Cancer Compound Library

---

Catalog Number: HY-L188

Library ID: HY-LD-000006434

# Anti-Brain Cancer Compound Library

## Product Details

|                  |                 |            |                                          |
|------------------|-----------------|------------|------------------------------------------|
| Catalog Number:  | HY-L188         | Container: | 96-well Format Sample Storage Tube       |
| Library ID:      | HY-LD-000006434 | Storage:   | In solvent: -80°C 2 years; -20°C 1 year; |
| Compound Number: | 1460 Compounds  | Powder:    | -20°C 3 years; 4°C 2 years;              |
| Plate Number:    | 23 Microplates  | Shipping:  | Blue Ice or Dry Ice                      |
| Size:            | 10 µL           | Packaging: | Inert Gas                                |

A USB drive is included in shipment that contains detailed information about the library.

## Plate Information

| # | Rack ID    | Formulation   | Compound Number |
|---|------------|---------------|-----------------|
| 1 | FK00226104 | 10 mM in DMSO | 80              |
| 2 | FK00229425 | 10 mM in DMSO | 80              |
| 3 | FK00237928 | 10 mM in DMSO | 80              |
| 4 | FK00234999 | 10 mM in DMSO | 80              |
| 5 | FK00074465 | 10 mM in DMSO | 80              |
| 6 | FK00074741 | 10 mM in DMSO | 80              |
| 7 | FK00229526 | 10 mM in DMSO | 80              |
| 8 | FK00086519 | 10 mM in DMSO | 80              |
| 9 | FK00074786 | 10 mM in DMSO | 80              |

## Plate Information

| #              | Rack ID    | Formulation      | Compound Number |
|----------------|------------|------------------|-----------------|
| 10             | FK00235189 | 10 mM in DMSO    | 80              |
| 11             | FK00238176 | 10 mM in DMSO    | 80              |
| 12             | FK00236446 | 10 mM in DMSO    | 80              |
| 13             | FK00234573 | 10 mM in DMSO    | 80              |
| 14             | FK00086007 | 10 mM in DMSO    | 80              |
| 15             | FK00234521 | 10 mM in DMSO    | 80              |
| 16             | FK00238024 | 10 mM in DMSO    | 80              |
| 17             | FK00229765 | 10 mM in DMSO    | 80              |
| 18             | FK00235571 | 10 mM in DMSO    | 33              |
| 19             | FK00227855 | 10 mM in H2O     | 23              |
| 20             | FK00229789 | 10 mM in Ethanol | 5               |
| 21             | FK00229645 | 2 mM in DMSO     | 35              |
| 22             | FK00226095 | 2 mM in H2O      | 1               |
| 23             | FK00229580 | 3 mg/mL in H2O   | 3               |
| 23 Microplates |            |                  | 1460 Compounds  |

10 mM in DMSO

Microplate

18

Compound

155  
2

# 01

Compound Library Layout: Rack FK00226104 (DMSO Solution, 10 mM, 80 Compounds)

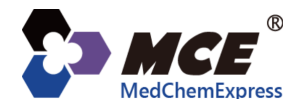

|   | 1           | 2                                                                         | 3                                                                                  | 4                                                                           | 5                                                                                | 6                                                                                                             | 7                                                                          | 8                                                                             | 9                                                                          | 10                                                                        | 11                                                                   | 12           |
|---|-------------|---------------------------------------------------------------------------|------------------------------------------------------------------------------------|-----------------------------------------------------------------------------|----------------------------------------------------------------------------------|---------------------------------------------------------------------------------------------------------------|----------------------------------------------------------------------------|-------------------------------------------------------------------------------|----------------------------------------------------------------------------|---------------------------------------------------------------------------|----------------------------------------------------------------------|--------------|
| A | Empty<br>A1 | VialCode: ZC03419482<br>Cat. No. : HY-10224A<br>Panobinostat (lactate)    | VialCode: ZC03419449<br>Cat. No. : HY-131345A<br>(S)-PI3K $\alpha$ -IN-4           | VialCode: ZC03419458<br>Cat. No. : HY-128669<br>Abemaciclib metabolite M2   | VialCode: ZC03419450<br>Cat. No. : HY-112452<br>SU11652                          | VialCode: ZC03419441<br>Cat. No. : HY-142042<br>3-Hydroxy-4-carboxy-5-oxo-1,2,3,4-tetrahydro-1H-benzothiazole | VialCode: ZC03419457<br>Cat. No. : HY-148070<br>FLT3-IN-17                 | VialCode: ZC03419433<br>Cat. No. : HY-101006<br>Methyl 2,5-dihydroxycinnamate | VialCode: ZC03419492<br>Cat. No. : HY-124726<br>Aumitin                    | VialCode: ZC03419490<br>Cat. No. : HY-18948<br>GSK321                     | VialCode: ZC03419491<br>Cat. No. : HY-10223<br>CUDC-101              | Empty<br>A12 |
| B | Empty<br>B1 | VialCode: ZC03419480<br>Cat. No. : HY-15656A<br>Ceritinib dihydrochloride | VialCode: ZC03419481<br>Cat. No. : HY-18007<br>ALW-II-41-27                        | VialCode: ZC03419440<br>Cat. No. : HY-18957<br>Lifirafenib                  | VialCode: ZC03419432<br>Cat. No. : HY-B0794B<br>AZ7550 Mesylate                  | VialCode: ZC03419464<br>Cat. No. : HY-W031727<br>Hydroxychloroquine                                           | VialCode: ZC03419489<br>Cat. No. : HY-15433<br>Quisinosat                  | VialCode: ZC03419472<br>Cat. No. : HY-13302B<br>CP-547632 (hydrochloride)     | VialCode: ZC03419488<br>Cat. No. : HY-138407<br>Evixapodlin                | VialCode: ZC03419484<br>Cat. No. : HY-18840<br>BBT594                     | VialCode: ZC03419476<br>Cat. No. : HY-19816<br>Avitinib              | Empty<br>B12 |
| C | Empty<br>C1 | VialCode: ZC03419436<br>Cat. No. : HY-78869<br>Mutated EGFR-IN-1          | VialCode: ZC03419479<br>Cat. No. : HY-150023<br>BI-1622                            | VialCode: ZC03419474<br>Cat. No. : HY-12960<br>SKLB4771                     | VialCode: ZC03419466<br>Cat. No. : HY-155959<br>PD-1/PD-L1-IN-33                 | VialCode: ZC03419459<br>Cat. No. : HY-148015<br>Enb Zotinib (enantiomer)                                      | VialCode: ZC03419451<br>Cat. No. : HY-12768<br>Sotuletinib                 | VialCode: ZC03419463<br>Cat. No. : HY-15777B<br>Ribociclib succinate          | VialCode: ZC03419483<br>Cat. No. : HY-10339<br>KW-2449                     | VialCode: ZC03419475<br>Cat. No. : HY-10325<br>CL-387785                  | VialCode: ZC03419444<br>Cat. No. : HY-132202<br>PD-1/PD-L1-IN-10     | Empty<br>C12 |
| D | Empty<br>D1 | VialCode: ZC03419456<br>Cat. No. : HY-100618<br>Hispidin                  | VialCode: ZC03419448<br>Cat. No. : HY-147259<br>Dalmelitininib                     | VialCode: ZC03419468<br>Cat. No. : HY-104008<br>ACY-957                     | VialCode: ZC03419487<br>Cat. No. : HY-132192A<br>PD-1/PD-L1-IN-9 (hydrochloride) | VialCode: ZC03419460<br>Cat. No. : HY-126319<br>SU5204                                                        | VialCode: ZC03419452<br>Cat. No. : HY-10228<br>Motesanib                   | VialCode: ZC03419427<br>Cat. No. : HY-152100<br>CUR5g                         | VialCode: ZC03419419<br>Cat. No. : HY-148561<br>CDK8-IN-12                 | VialCode: ZC03419467<br>Cat. No. : HY-158149<br>T-1-PMPA                  | VialCode: ZC03419471<br>Cat. No. : HY-13972<br>Mutant IDH1 inhibitor | Empty<br>D12 |
| E | Empty<br>E1 | VialCode: ZC03419455<br>Cat. No. : HY-117709<br>BRD6688                   | VialCode: ZC03419447<br>Cat. No. : HY-153894<br>SRX3177                            | VialCode: ZC03419442<br>Cat. No. : HY-112301A<br>trans-Pralsetinib          | VialCode: ZC03419435<br>Cat. No. : HY-100818<br>Futibatininib                    | VialCode: ZC03419473<br>Cat. No. : HY-18833<br>ALW-II-49-7                                                    | VialCode: ZC03419465<br>Cat. No. : HY-10346A<br>AV-412 (free base)         | VialCode: ZC03419443<br>Cat. No. : HY-W058849<br>MT 63-78                     | VialCode: ZC03419434<br>Cat. No. : HY-N2037A<br>Higenamine (hydrochloride) | VialCode: ZC03419402<br>Cat. No. : HY-102011A<br>BMS-1166 (hydrochloride) | VialCode: ZC03419426<br>Cat. No. : HY-14723<br>AMG-458               | Empty<br>E12 |
| F | Empty<br>F1 | VialCode: ZC03419425<br>Cat. No. : HY-12866<br>Larotrectinib              | VialCode: ZC03419417<br>Cat. No. : HY-13334A<br>BGT226                             | VialCode: ZC03419403<br>Cat. No. : HY-135827A<br>Roginolisib (hemifumarate) | VialCode: ZC03419420<br>Cat. No. : HY-116274<br>BMS-8                            | VialCode: ZC03419412<br>Cat. No. : HY-10367A<br>Canertinib (dihydrochloride)                                  | VialCode: ZC03419411<br>Cat. No. : HY-N2112<br>Glaucocalyxin A             | VialCode: ZC03419410<br>Cat. No. : HY-12965<br>S49076                         | VialCode: ZC03419418<br>Cat. No. : HY-136420<br>SJF-0628                   | VialCode: ZC03419404<br>Cat. No. : HY-50706<br>Selumetinib                | VialCode: ZC03419428<br>Cat. No. : HY-107408<br>SANT 2               | Empty<br>F12 |
| G | Empty<br>G1 | VialCode: ZC03419401<br>Cat. No. : HY-13333<br>NVP-BAG956                 | VialCode: ZC03419398<br>Cat. No. : HY-50898B<br>Lapatinib (ditosylate monohydrate) | VialCode: ZC03419439<br>Cat. No. : HY-15248<br>GDC-0349                     | VialCode: ZC03419406<br>Cat. No. : HY-W011522<br>Taurolidine                     | VialCode: ZC03419431<br>Cat. No. : HY-160093<br>SQLE-IN-1                                                     | VialCode: ZC03419409<br>Cat. No. : HY-P1399A<br>Pep2m, myristoylated (TFA) | VialCode: ZC03419438<br>Cat. No. : HY-10206<br>Amuvatinib                     | VialCode: ZC03419478<br>Cat. No. : HY-19700<br>trans-Zeatin                | VialCode: ZC03419486<br>Cat. No. : HY-13504<br>PIK-293                    | VialCode: ZC03419430<br>Cat. No. : HY-77113<br>B-Raf IN 11           | Empty<br>G12 |
| H | Empty<br>H1 | VialCode: ZC03419414<br>Cat. No. : HY-16966<br>SBI-0206965                | VialCode: ZC03419422<br>Cat. No. : HY-101921<br>PI3K $\delta$ -IN-1                | VialCode: ZC03419416<br>Cat. No. : HY-112306<br>Ripretinib                  | VialCode: ZC03419429<br>Cat. No. : HY-13016<br>Cabozantinib                      | VialCode: ZC03419437<br>Cat. No. : HY-10527<br>Telatinib                                                      | VialCode: ZC03419423<br>Cat. No. : HY-117244<br>AZD7507                    | VialCode: ZC03419415<br>Cat. No. : HY-N2450<br>Sulforaphene                   | VialCode: ZC03419424<br>Cat. No. : HY-19729<br>Naquotininib                | VialCode: ZC03419462<br>Cat. No. : HY-P3342<br>[D-Leu-4]-OB3              | VialCode: ZC03419470<br>Cat. No. : HY-136534<br>RET V804M-IN-1       | Empty<br>H12 |

# 02

Compound Library Layout: Rack FK00229425 (DMSO Solution, 10 mM, 80 Compounds)



|   | 1           | 2                                                                    | 3                                                                            | 4                                                                      | 5                                                             | 6                                                                      | 7                                                                          | 8                                                               | 9                                                                  | 10                                                                        | 11                                                                | 12           |
|---|-------------|----------------------------------------------------------------------|------------------------------------------------------------------------------|------------------------------------------------------------------------|---------------------------------------------------------------|------------------------------------------------------------------------|----------------------------------------------------------------------------|-----------------------------------------------------------------|--------------------------------------------------------------------|---------------------------------------------------------------------------|-------------------------------------------------------------------|--------------|
| A | Empty<br>A1 | VialCode: ZC03419400<br>Cat. No. : HY-112897<br>IITZ-01              | VialCode: ZC03419453<br>Cat. No. : HY-132231<br>FD223                        | VialCode: ZC03419477<br>Cat. No. : HY-149213<br>LSD1-IN-24             | VialCode: ZC03419485<br>Cat. No. : HY-109189<br>Reziveritinib | VialCode: ZC03419445<br>Cat. No. : HY-136430<br>JCN037                 | VialCode: ZC03419397<br>Cat. No. : HY-119940<br>MC180295                   | VialCode: ZC03419405<br>Cat. No. : HY-112904<br>XRK3F2          | VialCode: ZC03419413<br>Cat. No. : HY-13449<br>TAK-733             | VialCode: ZC03419421<br>Cat. No. : HY-147311<br>NSC622608                 | VialCode: ZC03419461<br>Cat. No. : HY-18947<br>SKLB-23bb          | Empty<br>A12 |
| B | Empty<br>B1 | VialCode: ZC03554850<br>Cat. No. : HY-161366<br>OMS14                | VialCode: ZC03419407<br>Cat. No. : HY-160092A<br>Martinostat (hydrochloride) | VialCode: ZC03419399<br>Cat. No. : HY-103566<br>LY456236               | VialCode: ZC03419408<br>Cat. No. : HY-19540<br>GSK864         | VialCode: ZC03419469<br>Cat. No. : HY-108701<br>Namp1-IN-3             | VialCode: ZC03419446<br>Cat. No. : HY-18713A<br>CRT0066854 (hydrochloride) | VialCode: ZC03419454<br>Cat. No. : HY-107363<br>FT-1518         | VialCode: ZC03554762<br>Cat. No. : HY-118521<br>AS-041164          | VialCode: ZC03554786<br>Cat. No. : HY-128572<br>FLT3-IN-6                 | VialCode: ZC03554842<br>Cat. No. : HY-18317<br>JNJ-38158471       | Empty<br>B12 |
| C | Empty<br>C1 | VialCode: ZC03554778<br>Cat. No. : HY-U00434<br>3BDO                 | VialCode: ZC03554833<br>Cat. No. : HY-19962<br>Paxalisib                     | VialCode: ZC03554849<br>Cat. No. : HY-163198<br>ASCT2-IN-1             | VialCode: ZC03554770<br>Cat. No. : HY-129111<br>EACC          | VialCode: ZC03554818<br>Cat. No. : HY-152852<br>Fematinib (free base)  | VialCode: ZC03554826<br>Cat. No. : HY-131658<br>VEGFR-2-IN-6               | VialCode: ZC03554802<br>Cat. No. : HY-112345<br>PD-089828       | VialCode: ZC03554810<br>Cat. No. : HY-18307<br>SYN1143             | VialCode: ZC03554794<br>Cat. No. : HY-132192<br>PD-1/PD-L1-IN-9           | VialCode: ZC03554834<br>Cat. No. : HY-1145497<br>D-(+)-Sorbose    | Empty<br>C12 |
| D | Empty<br>D1 | VialCode: ZC03554793<br>Cat. No. : HY-124066<br>RU-302               | VialCode: ZC03554801<br>Cat. No. : HY-10987<br>ENMD-2076 (Tartrate)          | VialCode: ZC03554817<br>Cat. No. : HY-156850<br>ITF 3756               | VialCode: ZC03554777<br>Cat. No. : HY-153896<br>LMTK3-IN-1    | VialCode: ZC03554841<br>Cat. No. : HY-114414<br>HDACs/mTOR Inhibitor 1 | VialCode: ZC03554809<br>Cat. No. : HY-156914<br>IGF-1R/SRC-IN-1            | VialCode: ZC03554761<br>Cat. No. : HY-19328<br>ACY-775          | VialCode: ZC03554769<br>Cat. No. : HY-114363A<br>SRI 31215 (TFA)   | VialCode: ZC03554825<br>Cat. No. : HY-131067<br>EMI56                     | VialCode: ZC03554785<br>Cat. No. : HY-12285<br>Serabelisib        | Empty<br>D12 |
| E | Empty<br>E1 | VialCode: ZC03554840<br>Cat. No. : HY-145613<br>5-Phenylpentan-2-one | VialCode: ZC03554848<br>Cat. No. : HY-13785<br>ZM 306416                     | VialCode: ZC03554760<br>Cat. No. : HY-118263<br>Dacomitinib (hydrate)  | VialCode: ZC03554808<br>Cat. No. : HY-136726<br>CGP-82996     | VialCode: ZC03554768<br>Cat. No. : HY-123950<br>MMRi64                 | VialCode: ZC03554776<br>Cat. No. : HY-13064<br>Cobimetinib                 | VialCode: ZC03554832<br>Cat. No. : HY-16069<br>Tucatinib        | VialCode: ZC03554816<br>Cat. No. : HY-13049<br>Cediranib (maleate) | VialCode: ZC03554824<br>Cat. No. : HY-17635<br>Leniolisib                 | VialCode: ZC03554792<br>Cat. No. : HY-N7844<br>N6-Benzyladenosine | Empty<br>E12 |
| F | Empty<br>F1 | VialCode: ZC03554791<br>Cat. No. : HY-13334<br>BGT226 (maleate)      | VialCode: ZC03554800<br>Cat. No. : HY-19348<br>Pimelic Diphenylamide 106     | VialCode: ZC03554823<br>Cat. No. : HY-142160<br>GNE-9815               | VialCode: ZC03554783<br>Cat. No. : HY-B0146<br>Verteporfin    | VialCode: ZC03554784<br>Cat. No. : HY-34595<br>Pyrazoloadenine         | VialCode: ZC03554831<br>Cat. No. : HY-150618<br>PI3Kα-IN-9                 | VialCode: ZC03554839<br>Cat. No. : HY-151590<br>DKFZ-748        | VialCode: ZC03554847<br>Cat. No. : HY-15814<br>HG-7-85-01          | VialCode: ZC03554807<br>Cat. No. : HY-103714<br>Ersartanib                | VialCode: ZC03554815<br>Cat. No. : HY-18603<br>FIIN-3             | Empty<br>F12 |
| G | Empty<br>G1 | VialCode: ZC03554806<br>Cat. No. : HY-U00448<br>ADDA 5 hydrochloride | VialCode: ZC03554814<br>Cat. No. : HY-131295<br>PD0325901-O-C2-diolane       | VialCode: ZC03554822<br>Cat. No. : HY-146153<br>HDAC-IN-40             | VialCode: ZC03554838<br>Cat. No. : HY-13001<br>Quizartinib    | VialCode: ZC03554799<br>Cat. No. : HY-123046<br>AS1708727              | VialCode: ZC03554830<br>Cat. No. : HY-107549<br>KD 5170                    | VialCode: ZC03554846<br>Cat. No. : HY-143403<br>PI3K-IN-31      | VialCode: ZC03554759<br>Cat. No. : HY-138751<br>limeritinib        | VialCode: ZC03554767<br>Cat. No. : HY-10331A<br>Regorafenib (monohydrate) | VialCode: ZC03554775<br>Cat. No. : HY-B0673<br>Pirfenidone        | Empty<br>G12 |
| H | Empty<br>H1 | VialCode: ZC03554798<br>Cat. No. : HY-10297<br>Ompalisib             | VialCode: ZC03554774<br>Cat. No. : HY-145426<br>MPTOB390                     | VialCode: ZC03554782<br>Cat. No. : HY-108604<br>Bisindolylmaleimide II | VialCode: ZC03554790<br>Cat. No. : HY-137315<br>TML-6         | VialCode: ZC03554829<br>Cat. No. : HY-162713<br>MTX-531                | VialCode: ZC03554758<br>Cat. No. : HY-151961<br>RSH-7                      | VialCode: ZC03554766<br>Cat. No. : HY-N1438<br>Hydroxygenkwanin | VialCode: ZC03554845<br>Cat. No. : HY-P5314<br>OK2                 | VialCode: ZC03554821<br>Cat. No. : HY-111570<br>PI3Ky inhibitor AZ2       | VialCode: ZC03554837<br>Cat. No. : HY-125017<br>Bozitinib         | Empty<br>H12 |

# 03

Compound Library Layout: Rack FK00237928 (DMSO Solution, 10 mM, 80 Compounds)



|   | 1           | 2                                                                            | 3                                                                 | 4                                                                                      | 5                                                                       | 6                                                                         | 7                                                                            | 8                                                                           | 9                                                                                       | 10                                                                        | 11                                                                | 12           |
|---|-------------|------------------------------------------------------------------------------|-------------------------------------------------------------------|----------------------------------------------------------------------------------------|-------------------------------------------------------------------------|---------------------------------------------------------------------------|------------------------------------------------------------------------------|-----------------------------------------------------------------------------|-----------------------------------------------------------------------------------------|---------------------------------------------------------------------------|-------------------------------------------------------------------|--------------|
| A | Empty<br>A1 | VialCode: ZC03622385<br>Cat. No. : HY-15510<br>Tenovin-6                     | VialCode: ZC03622361<br>Cat. No. : HY-126320<br>EGFR-IN-8         | VialCode: ZC03622345<br>Cat. No. : HY-16590<br>X-376                                   | VialCode: ZC03622353<br>Cat. No. : HY-13271A<br>Tubastatin A            | VialCode: ZC03622400<br>Cat. No. : HY-18602<br>FIIN-2                     | VialCode: ZC03622392<br>Cat. No. : HY-13979<br>DDR1-IN-1                     | VialCode: ZC03622384<br>Cat. No. : HY-112443<br>AZD3458                     | VialCode: ZC03622328<br>Cat. No. : HY-126146<br>PKC-iota inhibitor 1                    | VialCode: ZC03622320<br>Cat. No. : HY-111818<br>TH34                      | VialCode: ZC03622312<br>Cat. No. : HY-10342<br>Enzastaurin        | Empty<br>A12 |
| B | Empty<br>B1 | VialCode: ZC03622327<br>Cat. No. : HY-126297<br>c-Fms-IN-10                  | VialCode: ZC03622399<br>Cat. No. : HY-50710<br>KU-0063794         | VialCode: ZC03622391<br>Cat. No. : HY-14842B<br>Givinostat (hydrochloride monohydrate) | VialCode: ZC03622383<br>Cat. No. : HY-14660<br>Dabrafenib               | VialCode: ZC03622376<br>Cat. No. : HY-13299A<br>MK-8033 (hydrochloride)   | VialCode: ZC03622368<br>Cat. No. : HY-101272<br>GDC-0326                     | VialCode: ZC03622360<br>Cat. No. : HY-13925<br>PD0166285                    | VialCode: ZC03622352<br>Cat. No. : HY-107145A<br>Ningetinib                             | VialCode: ZC03622344<br>Cat. No. : HY-16962<br>CC-115                     | VialCode: ZC03622336<br>Cat. No. : HY-12062<br>PD318088           | Empty<br>B12 |
| C | Empty<br>C1 | VialCode: ZC03622398<br>Cat. No. : HY-13493<br>AC710                         | VialCode: ZC03622390<br>Cat. No. : HY-117800<br>BJE6-106          | VialCode: ZC03622351<br>Cat. No. : HY-50686<br>Tivantinib                              | VialCode: ZC03622343<br>Cat. No. : HY-14719<br>RO4987655                | VialCode: ZC03622335<br>Cat. No. : HY-132166<br>M4205                     | VialCode: ZC03622375<br>Cat. No. : HY-12076<br>BMS 777607                    | VialCode: ZC03622367<br>Cat. No. : HY-112782<br>VTX-27                      | VialCode: ZC03622359<br>Cat. No. : HY-N0136A<br>(±)-Taxifolin                           | VialCode: ZC03622319<br>Cat. No. : HY-100394<br>NVP-BAW2881               | VialCode: ZC03622311<br>Cat. No. : HY-21292<br>SU5214             | Empty<br>C12 |
| D | Empty<br>D1 | VialCode: ZC03622334<br>Cat. No. : HY-15458<br>SAR131675                     | VialCode: ZC03622358<br>Cat. No. : HY-10580<br>GSK 3 Inhibitor IX | VialCode: ZC03622350<br>Cat. No. : HY-100756<br>BAY-826                                | VialCode: ZC03622342<br>Cat. No. : HY-12494<br>LDC1267                  | VialCode: ZC03622382<br>Cat. No. : HY-133083<br>BAY-474                   | VialCode: ZC03622374<br>Cat. No. : HY-19618<br>BRD3308                       | VialCode: ZC03622366<br>Cat. No. : HY-131972<br>PF-06843195                 | VialCode: ZC03622326<br>Cat. No. : HY-13038<br>Fostamatinib Disodium                    | VialCode: ZC03622318<br>Cat. No. : HY-108766<br>Ponatinib (hydrochloride) | VialCode: ZC03622310<br>Cat. No. : HY-15150<br>Bemcentinib        | Empty<br>D12 |
| E | Empty<br>E1 | VialCode: ZC03622377<br>Cat. No. : HY-112719<br>BRD 4354                     | VialCode: ZC03622369<br>Cat. No. : HY-108264<br>TCS 21311         | VialCode: ZC03622337<br>Cat. No. : HY-N0284<br>Esculetin                               | VialCode: ZC03622329<br>Cat. No. : HY-100470<br>NSC781406               | VialCode: ZC03622321<br>Cat. No. : HY-16596<br>CNX-1351                   | VialCode: ZC03622313<br>Cat. No. : HY-101041<br>(E)-AG 556                   | VialCode: ZC03622401<br>Cat. No. : HY-101146<br>SF2523                      | VialCode: ZC03622393<br>Cat. No. : HY-100213<br>EAI045                                  | VialCode: ZC03554805<br>Cat. No. : HY-136209<br>SU5208                    | VialCode: ZC03554813<br>Cat. No. : HY-N5136<br>25(R,S)-Ruscogenin | Empty<br>E12 |
| F | Empty<br>F1 | VialCode: ZC03554796<br>Cat. No. : HY-16749A<br>Pexidartinib (hydrochloride) | VialCode: ZC03554757<br>Cat. No. : HY-14177<br>Raf inhibitor 1    | VialCode: ZC03554765<br>Cat. No. : HY-112823A<br>Almonertinib (mesylate)               | VialCode: ZC03554781<br>Cat. No. : HY-139662<br>HB007                   | VialCode: ZC03554804<br>Cat. No. : HY-15729<br>Rociletinib                | VialCode: ZC03554789<br>Cat. No. : HY-13735A<br>Quinacrine (dihydrochloride) | VialCode: ZC03554773<br>Cat. No. : HY-15280<br>GSK2292767                   | VialCode: ZC03554820<br>Cat. No. : HY-15504<br>RGB-286638                               | VialCode: ZC03554797<br>Cat. No. : HY-50904<br>Nintedanib                 | VialCode: ZC03554812<br>Cat. No. : HY-138072<br>EMI1              | Empty<br>F12 |
| G | Empty<br>G1 | VialCode: ZC03554764<br>Cat. No. : HY-10008<br>SNS-032                       | VialCode: ZC03554772<br>Cat. No. : HY-12310<br>RSC133             | VialCode: ZC03554811<br>Cat. No. : HY-N0787<br>Cryptochlorogenic acid                  | VialCode: ZC03554756<br>Cat. No. : HY-13537A<br>BPR1J-097 Hydrochloride | VialCode: ZC03554803<br>Cat. No. : HY-16069A<br>Tucatinib (hemithanolate) | VialCode: ZC03554828<br>Cat. No. : HY-144315<br>CYD19                        | VialCode: ZC03554836<br>Cat. No. : HY-B0791<br>Altiratinib                  | VialCode: ZC03554844<br>Cat. No. : HY-159045<br>F-SAHA                                  | VialCode: ZC03554780<br>Cat. No. : HY-12204<br>PFK-015                    | VialCode: ZC03554788<br>Cat. No. : HY-13404<br>Capmatinib         | Empty<br>G12 |
| H | Empty<br>H1 | VialCode: ZC03554763<br>Cat. No. : HY-N6843<br>Arnicolide D                  | VialCode: ZC03554771<br>Cat. No. : HY-13914<br>Ronniciclib        | VialCode: ZC03554779<br>Cat. No. : HY-101958<br>Tyroprostin 25                         | VialCode: ZC03554787<br>Cat. No. : HY-138751A<br>limeritinib (diTFA)    | VialCode: ZC03554795<br>Cat. No. : HY-132935<br>BPR1R024                  | VialCode: ZC03554819<br>Cat. No. : HY-131344<br>mTOR inhibitor-8             | VialCode: ZC03554827<br>Cat. No. : HY-N4201<br>β-Hydroxyisovaleryls hikonin | VialCode: ZC03554835<br>Cat. No. : HY-N2038<br>3, 5, 6, 7, 8, 3', 4'-Heptemthoxyflavone | VialCode: ZC03554843<br>Cat. No. : HY-128778<br>DBPR112                   | VialCode: ZC03554755<br>Cat. No. : HY-107834<br>PIK-75            | Empty<br>H12 |

# 04

Compound Library Layout: Rack FK00234999 (DMSO Solution, 10 mM, 80 Compounds)



|   | 1           | 2                                                                         | 3                                                           | 4                                                         | 5                                                                        | 6                                                                                 | 7                                                                            | 8                                                              | 9                                                                         | 10                                                                   | 11                                                                       | 12           |
|---|-------------|---------------------------------------------------------------------------|-------------------------------------------------------------|-----------------------------------------------------------|--------------------------------------------------------------------------|-----------------------------------------------------------------------------------|------------------------------------------------------------------------------|----------------------------------------------------------------|---------------------------------------------------------------------------|----------------------------------------------------------------------|--------------------------------------------------------------------------|--------------|
| A | Empty<br>A1 | VialCode: ZC03622307<br>Cat. No.: HY-111783<br>AZD-7648                   | VialCode: ZC03622315<br>Cat. No.: HY-13686<br>PQ401         | VialCode: ZC03622323<br>Cat. No.: HY-111400<br>SR-4370    | VialCode: ZC03622331<br>Cat. No.: HY-16558<br>Butein                     | VialCode: ZC03622339<br>Cat. No.: HY-11009<br>CGP60474                            | VialCode: ZC03622347<br>Cat. No.: HY-N6038<br>Gartanin                       | VialCode: ZC03622386<br>Cat. No.: HY-19798<br>PI4KIIIbeta-IN-9 | VialCode: ZC03622394<br>Cat. No.: HY-148365<br>Necrolr1                   | VialCode: ZC03622370<br>Cat. No.: HY-75124<br>(Rac)-AZD 6482         | VialCode: ZC03622378<br>Cat. No.: HY-15609<br>AZD-3463                   | Empty<br>A12 |
| B | Empty<br>B1 | VialCode: ZC03622324<br>Cat. No.: HY-10229<br>Motesanib (Diphosphate)     | VialCode: ZC03622332<br>Cat. No.: HY-116000<br>Glumetinib   | VialCode: ZC03622340<br>Cat. No.: HY-10045<br>AEE788      | VialCode: ZC03622348<br>Cat. No.: HY-136256<br>Vimseltinib               | VialCode: ZC03622379<br>Cat. No.: HY-N0146<br>Quercetin (dihydrate)               | VialCode: ZC03622387<br>Cat. No.: HY-13909<br>RGFP966                        | VialCode: ZC03622395<br>Cat. No.: HY-12014<br>SU11274          | VialCode: ZC03622355<br>Cat. No.: HY-100962<br>(E)-AG 99                  | VialCode: ZC03622363<br>Cat. No.: HY-N0575<br>Pinocembrin            | VialCode: ZC03622371<br>Cat. No.: HY-15510B<br>Tenovin-6 (Hydrochloride) | Empty<br>B12 |
| C | Empty<br>C1 | VialCode: ZC03622308<br>Cat. No.: HY-19642A<br>Glesatinib (hydrochloride) | VialCode: ZC03622316<br>Cat. No.: HY-12042<br>Pimasertib    | VialCode: ZC03622356<br>Cat. No.: HY-112801<br>F-1        | VialCode: ZC03622364<br>Cat. No.: HY-10200<br>BMS-754807                 | VialCode: ZC03622372<br>Cat. No.: HY-10201A<br>Sorafenib (Tosylate)               | VialCode: ZC03622380<br>Cat. No.: HY-16961<br>Sitravatinib                   | VialCode: ZC03622388<br>Cat. No.: HY-101780<br>Tinostamustine  | VialCode: ZC03622396<br>Cat. No.: HY-145587<br>Paltimatrectinib           | VialCode: ZC03622341<br>Cat. No.: HY-50703<br>MK-2461                | VialCode: ZC03622349<br>Cat. No.: HY-50864<br>GDC-0879                   | Empty<br>C12 |
| D | Empty<br>D1 | VialCode: ZC03622309<br>Cat. No.: HY-101568<br>Roblitinib                 | VialCode: ZC03622317<br>Cat. No.: HY-10408<br>Ki20227       | VialCode: ZC03622325<br>Cat. No.: HY-106409<br>Tefinostat | VialCode: ZC03622381<br>Cat. No.: HY-10252<br>NVP-ADW742                 | VialCode: ZC03622389<br>Cat. No.: HY-10343<br>Sotrastaurin                        | VialCode: ZC03622397<br>Cat. No.: HY-103712A<br>Samuraciclib (hydrochloride) | VialCode: ZC03622357<br>Cat. No.: HY-16425<br>RG2833           | VialCode: ZC03622365<br>Cat. No.: HY-18299A<br>Purvalanol A               | VialCode: ZC03622373<br>Cat. No.: HY-13491<br>GNF-5837               | VialCode: ZC03622333<br>Cat. No.: HY-100429<br>CAN508                    | Empty<br>D12 |
| E | Empty<br>E1 | VialCode: ZC03640860<br>Cat. No.: HY-16914<br>MC1568                      | VialCode: ZC03640915<br>Cat. No.: HY-12017<br>PF-04217903   | VialCode: ZC03640876<br>Cat. No.: HY-118203<br>SU4984     | VialCode: ZC03640843<br>Cat. No.: HY-N0741A<br>Leonurine (hydrochloride) | VialCode: ZC03640923<br>Cat. No.: HY-19815<br>Olapertinib                         | VialCode: ZC03640835<br>Cat. No.: HY-Y0152<br>Cinchonine                     | VialCode: ZC03640851<br>Cat. No.: HY-N0103<br>Sophocarpine     | VialCode: ZC03640891<br>Cat. No.: HY-110109<br>ETP-45658                  | VialCode: ZC03640899<br>Cat. No.: HY-12000<br>AG490                  | VialCode: ZC03640907<br>Cat. No.: HY-W023758<br>HDGFRP2/PSIP1-IN-        | Empty<br>E12 |
| F | Empty<br>F1 | VialCode: ZC03640836<br>Cat. No.: HY-B0793<br>AZ-5104                     | VialCode: ZC03640844<br>Cat. No.: HY-12016<br>KU-55933      | VialCode: ZC03640852<br>Cat. No.: HY-11004<br>AZ 628      | VialCode: ZC03640908<br>Cat. No.: HY-13530<br>CAY10505                   | VialCode: ZC03640916<br>Cat. No.: HY-15166A<br>(E/Z)-Zotiraciclib (hydrochloride) | VialCode: ZC03640924<br>Cat. No.: HY-13263<br>CHIR-124                       | VialCode: ZC03640892<br>Cat. No.: HY-10321<br>PD173074         | VialCode: ZC03640900<br>Cat. No.: HY-114177<br>Ebvaciclib                 | VialCode: ZC03640868<br>Cat. No.: HY-12467<br>OTS964 (hydrochloride) | VialCode: ZC03640884<br>Cat. No.: HY-112720<br>AGL-2263                  | Empty<br>F12 |
| G | Empty<br>G1 | VialCode: ZC03640845<br>Cat. No.: HY-51424<br>PLX-4720                    | VialCode: ZC03640853<br>Cat. No.: HY-15108<br>Purmorphamine | VialCode: ZC03640861<br>Cat. No.: HY-15486<br>Salubrinol  | VialCode: ZC03640869<br>Cat. No.: HY-19350<br>BML-210                    | VialCode: ZC03640877<br>Cat. No.: HY-12075<br>LY2109761                           | VialCode: ZC03640885<br>Cat. No.: HY-12028<br>PD98059                        | VialCode: ZC03640893<br>Cat. No.: HY-12794<br>Vps34-PIK-III    | VialCode: ZC03640901<br>Cat. No.: HY-112292A<br>GW806742X (hydrochloride) | VialCode: ZC03640909<br>Cat. No.: HY-13020<br>GSK1838705A            | VialCode: ZC03640925<br>Cat. No.: HY-15437<br>SL327                      | Empty<br>G12 |
| H | Empty<br>H1 | VialCode: ZC03622322<br>Cat. No.: HY-13261<br>A66                         | VialCode: ZC03622306<br>Cat. No.: HY-15466<br>Izorlisib     | VialCode: ZC03622314<br>Cat. No.: HY-12001<br>WZ-3146     | VialCode: ZC03640837<br>Cat. No.: HY-12235<br>PI-3065                    | VialCode: ZC03622346<br>Cat. No.: HY-W001179<br>2,5-Dihydroxybenzoic acid         | VialCode: ZC03622354<br>Cat. No.: HY-10501A<br>SU14813 (maleate)             | VialCode: ZC03622362<br>Cat. No.: HY-13018<br>MRT67307         | VialCode: ZC03622330<br>Cat. No.: HY-18629<br>SU9516                      | VialCode: ZC03622338<br>Cat. No.: HY-10410<br>TG101209               | VialCode: ZC03640917<br>Cat. No.: HY-W011266<br>JNJ-10198409             | Empty<br>H12 |

# 05

Compound Library Layout: Rack FK00074465 (DMSO Solution, 10 mM, 80 Compounds)



|   | 1           | 2                                                                        | 3                                                            | 4                                                              | 5                                                                | 6                                                                       | 7                                                                             | 8                                                                     | 9                                                         | 10                                                                               | 11                                                           | 12           |
|---|-------------|--------------------------------------------------------------------------|--------------------------------------------------------------|----------------------------------------------------------------|------------------------------------------------------------------|-------------------------------------------------------------------------|-------------------------------------------------------------------------------|-----------------------------------------------------------------------|-----------------------------------------------------------|----------------------------------------------------------------------------------|--------------------------------------------------------------|--------------|
| A | Empty<br>A1 | VialCode: ZC03640832<br>Cat. No. : HY-10183<br>Go6976                    | VialCode: ZC03640840<br>Cat. No. : HY-16782<br>Pexmetinib    | VialCode: ZC03640848<br>Cat. No. : HY-50866<br>NVP-AEW541      | VialCode: ZC03640880<br>Cat. No. : HY-12481<br>SAR405            | VialCode: ZC03640920<br>Cat. No. : HY-15767<br>TAK-632                  | VialCode: ZC03640856<br>Cat. No. : HY-14674<br>CP-724714                      | VialCode: ZC03640864<br>Cat. No. : HY-50940<br>AT7519                 | VialCode: ZC03640872<br>Cat. No. : HY-13459<br>PF-5274857 | VialCode: ZC03640896<br>Cat. No. : HY-13258A<br>NVP-BHG712                       | VialCode: ZC03640888<br>Cat. No. : HY-13689<br>Go 6983       | Empty<br>A12 |
| B | Empty<br>B1 | VialCode: ZC03640833<br>Cat. No. : HY-19327<br>ACY-738                   | VialCode: ZC03640841<br>Cat. No. : HY-15514<br>Merestinib    | VialCode: ZC03640912<br>Cat. No. : HY-12041<br>SP600125        | VialCode: ZC03640849<br>Cat. No. : HY-10966<br>SB-590885         | VialCode: ZC03640873<br>Cat. No. : HY-13266A<br>BS-181 (hydrochlorid e) | VialCode: ZC03640881<br>Cat. No. : HY-10344<br>AZD 6482                       | VialCode: ZC03640889<br>Cat. No. : HY-11105<br>Pilaralisib analogue   | VialCode: ZC03640857<br>Cat. No. : HY-18744<br>FLT3-IN-2  | VialCode: ZC03640865<br>Cat. No. : HY-10114<br>TGX-221                           | VialCode: ZC03640904<br>Cat. No. : HY-17598<br>Rafoxanide    | Empty<br>B12 |
| C | Empty<br>C1 | VialCode: ZC03640858<br>Cat. No. : HY-130538<br>1-Naphthohydroxamic acid | VialCode: ZC03640834<br>Cat. No. : HY-114169<br>WRG-28       | VialCode: ZC03640842<br>Cat. No. : HY-10374<br>Semaxinib       | VialCode: ZC03640850<br>Cat. No. : HY-14574<br>PF-03814735       | VialCode: ZC03640913<br>Cat. No. : HY-17601<br>Alofanib                 | VialCode: ZC03640921<br>Cat. No. : HY-15945<br>DBeQ                           | VialCode: ZC03640897<br>Cat. No. : HY-14346<br>PD153035               | VialCode: ZC03640874<br>Cat. No. : HY-13002<br>Torin 2    | VialCode: ZC03640905<br>Cat. No. : HY-10337<br>Brivanib                          | VialCode: ZC03640866<br>Cat. No. : HY-18314<br>GW 441756     | Empty<br>C12 |
| D | Empty<br>D1 | VialCode: ZC03640890<br>Cat. No. : HY-78695<br>JQ-1 (carboxylic acid)    | VialCode: ZC03640898<br>Cat. No. : HY-10254<br>Mirdametinib  | VialCode: ZC03640859<br>Cat. No. : HY-12558<br>LY3009120       | VialCode: ZC03640867<br>Cat. No. : HY-10108<br>LY294002          | VialCode: ZC03640922<br>Cat. No. : HY-10253<br>AG1024                   | VialCode: ZC03640875<br>Cat. No. : HY-13264<br>Degrasyn                       | VialCode: ZC03640883<br>Cat. No. : HY-N0242<br>Fraxinellone           | VialCode: ZC03640906<br>Cat. No. : HY-101768<br>PRN1371   | VialCode: ZC03640914<br>Cat. No. : HY-13867<br>Bisindolylmaleimide I             | VialCode: ZC03640882<br>Cat. No. : HY-18963<br>Lavendustin A | Empty<br>D12 |
| E | Empty<br>E1 | VialCode: ZC03597000<br>Cat. No. : HY-15801<br>HG-14-10-04               | VialCode: ZC03596985<br>Cat. No. : HY-18227<br>B-Raf IN 1    | VialCode: ZC03597072<br>Cat. No. : HY-107365<br>PQR530         | VialCode: ZC03597065<br>Cat. No. : HY-103442<br>CGP52411         | VialCode: ZC03597033<br>Cat. No. : HY-N2566<br>Euscaphic acid           | VialCode: ZC03597024<br>Cat. No. : HY-111940<br>LUT014                        | VialCode: ZC03597017<br>Cat. No. : HY-114358<br>Tamnorzatinib         | VialCode: ZC03597008<br>Cat. No. : HY-119944<br>JND3229   | VialCode: ZC03597001<br>Cat. No. : HY-147250A<br>Lirafugratinib (hydr ochloride) | VialCode: ZC03596992<br>Cat. No. : HY-12340<br>ETP-46321     | Empty<br>E12 |
| F | Empty<br>F1 | VialCode: ZC03640854<br>Cat. No. : HY-132842A<br>(S)-Sunvozertinib       | VialCode: ZC03640862<br>Cat. No. : HY-109080<br>Belvarafenib | VialCode: ZC03640870<br>Cat. No. : HY-10501<br>SU14813         | VialCode: ZC03640878<br>Cat. No. : HY-20878<br>Tyrphostin AG 879 | VialCode: ZC03596984<br>Cat. No. : HY-10524<br>GSK1904529A              | VialCode: ZC03597073<br>Cat. No. : HY-103002<br>SU5408                        | VialCode: ZC03597064<br>Cat. No. : HY-111508<br>PI3K/mTOR Inhibitor-2 | VialCode: ZC03597059<br>Cat. No. : HY-111791<br>ACY-1083  | VialCode: ZC03597049<br>Cat. No. : HY-112808<br>KAN0438757                       | VialCode: ZC03597040<br>Cat. No. : HY-145723<br>MAX-40279    | Empty<br>F12 |
| G | Empty<br>G1 | VialCode: ZC03640886<br>Cat. No. : HY-70063<br>Buparlisib                | VialCode: ZC03640871<br>Cat. No. : HY-13895<br>WHI-P154      | VialCode: ZC03640894<br>Cat. No. : HY-15357<br>ALK inhibitor 1 | VialCode: ZC03640902<br>Cat. No. : HY-18652<br>Avutometinib      | VialCode: ZC03640910<br>Cat. No. : HY-12056<br>BIX02189                 | VialCode: ZC03640918<br>Cat. No. : HY-50934<br>Tacedinaline                   | VialCode: ZC03640830<br>Cat. No. : HY-13024<br>Rebastinib             | VialCode: ZC03640838<br>Cat. No. : HY-15371<br>Forskolin  | VialCode: ZC03640846<br>Cat. No. : HY-131003<br>Taletrectinib                    | VialCode: ZC03640855<br>Cat. No. : HY-12806<br>AG1557        | Empty<br>G12 |
| H | Empty<br>H1 | VialCode: ZC03640831<br>Cat. No. : HY-15511<br>Tyrphostin A9             | VialCode: ZC03640839<br>Cat. No. : HY-112037<br>IACS-010759  | VialCode: ZC03640847<br>Cat. No. : HY-17589A<br>Chloroquine    | VialCode: ZC03640903<br>Cat. No. : HY-12869<br>AZD-8835          | VialCode: ZC03640911<br>Cat. No. : HY-112292<br>GW806742X               | VialCode: ZC03640919<br>Cat. No. : HY-112037A<br>IACS-010759 (hydroch loride) | VialCode: ZC03640879<br>Cat. No. : HY-15003<br>ATH686                 | VialCode: ZC03640887<br>Cat. No. : HY-18072<br>GSK2606414 | VialCode: ZC03640895<br>Cat. No. : HY-12019<br>SGX-523                           | VialCode: ZC03640863<br>Cat. No. : HY-100631<br>FGFR4-IN-1   | Empty<br>H12 |

# 06

Compound Library Layout: Rack FK00074741 (DMSO Solution, 10 mM, 80 Compounds)



|   | 1           | 2                                                                                  | 3                                                         | 4                                                                                 | 5                                                                   | 6                                                                        | 7                                                                      | 8                                                                            | 9                                                                      | 10                                                                     | 11                                                                         | 12           |
|---|-------------|------------------------------------------------------------------------------------|-----------------------------------------------------------|-----------------------------------------------------------------------------------|---------------------------------------------------------------------|--------------------------------------------------------------------------|------------------------------------------------------------------------|------------------------------------------------------------------------------|------------------------------------------------------------------------|------------------------------------------------------------------------|----------------------------------------------------------------------------|--------------|
| A | Empty<br>A1 | VialCode: ZC03597035<br>Cat. No.: HY-18360<br>TMP269                               | VialCode: ZC03597027<br>Cat. No.: HY-18965<br>TAS-301     | VialCode: ZC03596988<br>Cat. No.: HY-12964<br>SGI-7079                            | VialCode: ZC03597076<br>Cat. No.: HY-104036<br>IDH-305              | VialCode: ZC03597069<br>Cat. No.: HY-17603<br>Belizatinib                | VialCode: ZC03597012<br>Cat. No.: HY-10115A<br>PI-103 (Hydrochlorid e) | VialCode: ZC03597004<br>Cat. No.: HY-15769<br>WHI-P180                       | VialCode: ZC03596996<br>Cat. No.: HY-111510<br>IPI-3063                | VialCode: ZC03597020<br>Cat. No.: HY-11107<br>PHA-665752               | VialCode: ZC03597028<br>Cat. No.: HY-16355<br>NVP-QAV-572                  | Empty<br>A12 |
| B | Empty<br>B1 | VialCode: ZC03597051<br>Cat. No.: HY-103443<br>HKI-357                             | VialCode: ZC03597043<br>Cat. No.: HY-19326<br>SU1498      | VialCode: ZC03596987<br>Cat. No.: HY-18961<br>PD 407824                           | VialCode: ZC03597075<br>Cat. No.: HY-15868<br>HS-173                | VialCode: ZC03597067<br>Cat. No.: HY-13898<br>Taselisib                  | VialCode: ZC03597011<br>Cat. No.: HY-18791<br>c-Fms-IN-1               | VialCode: ZC03597003<br>Cat. No.: HY-108254<br>Bisindolylmaleimide IV        | VialCode: ZC03596995<br>Cat. No.: HY-12381<br>PIK-75 (hydrochlorid e)  | VialCode: ZC03597019<br>Cat. No.: HY-119939<br>CHDI-390576             | VialCode: ZC03597058<br>Cat. No.: HY-112423<br>CE-245677                   | Empty<br>B12 |
| C | Empty<br>C1 | VialCode: ZC03597050<br>Cat. No.: HY-12972<br>Mavelertinib                         | VialCode: ZC03597056<br>Cat. No.: HY-100384<br>NKL 22     | VialCode: ZC03597042<br>Cat. No.: HY-19772<br>GSK3117391                          | VialCode: ZC03597034<br>Cat. No.: HY-110135A<br>NBI-31772 (hydrate) | VialCode: ZC03596986<br>Cat. No.: HY-120438<br>TASP0415914               | VialCode: ZC03597074<br>Cat. No.: HY-135890<br>CG347B                  | VialCode: ZC03597066<br>Cat. No.: HY-15994<br>Citarinostat                   | VialCode: ZC03597026<br>Cat. No.: HY-12895<br>SKI V                    | VialCode: ZC03597018<br>Cat. No.: HY-12017A<br>PF-04217903 (mesylat e) | VialCode: ZC03597010<br>Cat. No.: HY-148059<br>Uplarafenib                 | Empty<br>C12 |
| D | Empty<br>D1 | VialCode: ZC03597057<br>Cat. No.: HY-130616<br>EGFR-IN-11                          | VialCode: ZC03597048<br>Cat. No.: HY-131908<br>CPL304110  | VialCode: ZC03597041<br>Cat. No.: HY-18622<br>PP58                                | VialCode: ZC03597002<br>Cat. No.: HY-108606<br>PI-828               | VialCode: ZC03596994<br>Cat. No.: HY-17044A<br>Duvelisib (R enantio mer) | VialCode: ZC03597032<br>Cat. No.: HY-15200<br>Agerafenib               | VialCode: ZC03597025<br>Cat. No.: HY-131900<br>Protein kinase inhib itor H-7 | VialCode: ZC03597016<br>Cat. No.: HY-145231<br>FGFR2-IN-2              | VialCode: ZC03597009<br>Cat. No.: HY-141805<br>MHY-1685                | VialCode: ZC03596993<br>Cat. No.: HY-101429<br>RG13022                     | Empty<br>D12 |
| E | Empty<br>E1 | VialCode: ZC03597063<br>Cat. No.: HY-10346<br>AV-412                               | VialCode: ZC03597071<br>Cat. No.: HY-13428<br>Tubacin     | VialCode: ZC03597055<br>Cat. No.: HY-10110<br>IC-87114                            | VialCode: ZC03597023<br>Cat. No.: HY-13907<br>TCS 359               | VialCode: ZC03597047<br>Cat. No.: HY-137742<br>SBP-7455                  | VialCode: ZC03597039<br>Cat. No.: HY-101219<br>VEGFR-IN-1              | VialCode: ZC03597031<br>Cat. No.: HY-145015<br>Tuspetinib                    | VialCode: ZC03597015<br>Cat. No.: HY-12807<br>FIPI                     | VialCode: ZC03597007<br>Cat. No.: HY-12846<br>CCT196969                | VialCode: ZC03596999<br>Cat. No.: HY-10204<br>OSI-930                      | Empty<br>E12 |
| F | Empty<br>F1 | VialCode: ZC03597062<br>Cat. No.: HY-18030A<br>CEP-28122 (mesylate salt)           | VialCode: ZC03597054<br>Cat. No.: HY-15282<br>E-64        | VialCode: ZC03597046<br>Cat. No.: HY-15166<br>(E/Z)-Zotiraciclib                  | VialCode: ZC03597038<br>Cat. No.: HY-101450<br>PF-6274484           | VialCode: ZC03597030<br>Cat. No.: HY-13524<br>AG-1478                    | VialCode: ZC03597006<br>Cat. No.: HY-15599<br>SSR128129E               | VialCode: ZC03596991<br>Cat. No.: HY-B0795<br>MHY1485                        | VialCode: ZC03597079<br>Cat. No.: HY-100365<br>Remetinostat            | VialCode: ZC03597022<br>Cat. No.: HY-13894<br>Tyrphostin AG1296        | VialCode: ZC03597014<br>Cat. No.: HY-13820<br>GSK2656157                   | Empty<br>F12 |
| G | Empty<br>G1 | VialCode: ZC03597029<br>Cat. No.: HY-15878<br>LDC000067                            | VialCode: ZC03597021<br>Cat. No.: HY-102033<br>Oxamflatin | VialCode: ZC03597037<br>Cat. No.: HY-12823<br>BLU9931                             | VialCode: ZC03596998<br>Cat. No.: HY-123607<br>UniPR129             | VialCode: ZC03596990<br>Cat. No.: HY-19745<br>BMS-202                    | VialCode: ZC03597078<br>Cat. No.: HY-19957<br>Zoligratinib             | VialCode: ZC03597070<br>Cat. No.: HY-100984<br>HA-100                        | VialCode: ZC03597013<br>Cat. No.: HY-100510<br>RAF709                  | VialCode: ZC03597005<br>Cat. No.: HY-108933<br>JK-P3                   | VialCode: ZC03596997<br>Cat. No.: HY-107145<br>Ningetinib Tosylate         | Empty<br>G12 |
| H | Empty<br>H1 | VialCode: ZC03597060<br>Cat. No.: HY-129624A<br>Bisindolylmaleimide VIII (acetate) | VialCode: ZC03597061<br>Cat. No.: HY-15275<br>BMS-265246  | VialCode: ZC03597053<br>Cat. No.: HY-111507<br>PDGFR $\alpha$ kinase inhibi tor 1 | VialCode: ZC03597045<br>Cat. No.: HY-18179<br>AZD2932               | VialCode: ZC03596989<br>Cat. No.: HY-112411<br>PD 174265                 | VialCode: ZC03597077<br>Cat. No.: HY-112822<br>ON-013100               | VialCode: ZC03597068<br>Cat. No.: HY-119367<br>ODM-203                       | VialCode: ZC03597052<br>Cat. No.: HY-124798<br>Rheb inhibitor NR1 M344 | VialCode: ZC03597044<br>Cat. No.: HY-13506<br>M344                     | VialCode: ZC03597036<br>Cat. No.: HY-19754A<br>CRA-026440 (hydrochl oride) | Empty<br>H12 |

# 07

Compound Library Layout: Rack FK00229526 (DMSO Solution, 10 mM, 80 Compounds)

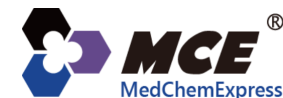

|   | 1           | 2                                                                                 | 3                                                                                   | 4                                                                             | 5                                                                                          | 6                                                                    | 7                                                                          | 8                                                                                   | 9                                                                                         | 10                                                                  | 11                                                                                  | 12           |
|---|-------------|-----------------------------------------------------------------------------------|-------------------------------------------------------------------------------------|-------------------------------------------------------------------------------|--------------------------------------------------------------------------------------------|----------------------------------------------------------------------|----------------------------------------------------------------------------|-------------------------------------------------------------------------------------|-------------------------------------------------------------------------------------------|---------------------------------------------------------------------|-------------------------------------------------------------------------------------|--------------|
| A | Empty<br>A1 | VialCode: ZC03488577<br>Cat. No. : HY-B0642<br>Isosorbide mononitrate<br>A2       | VialCode: ZC03488634<br>Cat. No. : HY-15202<br>Binimetinib<br>A3                    | VialCode: ZC03488626<br>Cat. No. : HY-10590<br>TWS119<br>A4                   | VialCode: ZC03488631<br>Cat. No. : HY-N1318<br>Salvigenin<br>A5                            | VialCode: ZC03488588<br>Cat. No. : HY-10991<br>MGCD-265 analog<br>A6 | VialCode: ZC03488580<br>Cat. No. : HY-14721<br>Tepotinib<br>A7             | VialCode: ZC03488585<br>Cat. No. : HY-147250<br>Lirafugratinib<br>A8                | VialCode: ZC03488623<br>Cat. No. : HY-13072<br>Ceniserib<br>A9                            | VialCode: ZC03488652<br>Cat. No. : HY-B2098<br>Lucanthone<br>A10    | VialCode: ZC03488644<br>Cat. No. : HY-17437A<br>Mefloquine (hydrochloride)<br>A11   | Empty<br>A12 |
| B | Empty<br>B1 | VialCode: ZC03488620<br>Cat. No. : HY-112299<br>Ziparetinib<br>B2                 | VialCode: ZC03488612<br>Cat. No. : HY-N0485<br>Liensinine (Diperchlorate)<br>B3     | VialCode: ZC03488602<br>Cat. No. : HY-12866A<br>Larotrectinib sulfate<br>B4   | VialCode: ZC03488594<br>Cat. No. : HY-12008<br>Erlotinib (Hydrochloride)<br>B5             | VialCode: ZC03488632<br>Cat. No. : HY-101561<br>Avapritinib<br>B6    | VialCode: ZC03488624<br>Cat. No. : HY-126052<br>Gnetol<br>B7               | VialCode: ZC03488650<br>Cat. No. : HY-13450<br>ZM 449829<br>B8                      | VialCode: ZC03488642<br>Cat. No. : HY-112412<br>PDGFR Tyrosine Kinase Inhibitor III<br>B9 | VialCode: ZC03488666<br>Cat. No. : HY-19986<br>AAL993<br>B10        | VialCode: ZC03488658<br>Cat. No. : HY-N0316<br>Mollugin<br>B11                      | Empty<br>B12 |
| C | Empty<br>C1 | VialCode: ZC03488668<br>Cat. No. : HY-N2037<br>Higenamine<br>C2                   | VialCode: ZC03488578<br>Cat. No. : HY-14842A<br>Givinostat (hydrochloride)<br>C3    | VialCode: ZC03488601<br>Cat. No. : HY-12423A<br>Pamufetinib (mesylate)<br>C4  | VialCode: ZC03488582<br>Cat. No. : HY-15492<br>AG-13958<br>C5                              | VialCode: ZC03488574<br>Cat. No. : HY-B1394<br>Khellin<br>C6         | VialCode: ZC03488586<br>Cat. No. : HY-10882<br>Clotrimazole<br>C7          | VialCode: ZC03488593<br>Cat. No. : HY-120590<br>Ruserontinib<br>C8                  | VialCode: ZC03488641<br>Cat. No. : HY-10230<br>Midostaurin<br>C9                          | VialCode: ZC03488647<br>Cat. No. : HY-12624<br>Narazaciclib<br>C10  | VialCode: ZC03488639<br>Cat. No. : HY-N0883<br>Gamabufotalin<br>C11                 | Empty<br>C12 |
| D | Empty<br>D1 | VialCode: ZC03488584<br>Cat. No. : HY-10260<br>Vandetanib<br>D2                   | VialCode: ZC03488660<br>Cat. No. : HY-145230<br>FGFR2-IN-1<br>D3                    | VialCode: ZC03488649<br>Cat. No. : HY-145723C<br>MAX-40279 (hemidipate)<br>D4 | VialCode: ZC03488598<br>Cat. No. : HY-12542A<br>Dantrolene (sodium hemiheptahydrate)<br>D5 | VialCode: ZC03488590<br>Cat. No. : HY-115716<br>EGFR-IN-17<br>D6     | VialCode: ZC03488603<br>Cat. No. : HY-12164<br>Mocetinostat<br>D7          | VialCode: ZC03488657<br>Cat. No. : HY-10407<br>SU 5402<br>D8                        | VialCode: ZC03488664<br>Cat. No. : HY-N0071<br>Crotonoside<br>D9                          | VialCode: ZC03488656<br>Cat. No. : HY-133553<br>RET-IN-3<br>D10     | VialCode: ZC03488595<br>Cat. No. : HY-14217<br>Quizartinib (dihydrochloride)<br>D11 | Empty<br>D12 |
| E | Empty<br>E1 | VialCode: ZC03488599<br>Cat. No. : HY-B1305<br>Chloropyramine hydrochloride<br>E2 | VialCode: ZC03488645<br>Cat. No. : HY-109190<br>Serlutinib<br>E3                    | VialCode: ZC03488630<br>Cat. No. : HY-19981<br>Derazantinib<br>E4             | VialCode: ZC03488622<br>Cat. No. : HY-17508<br>Clarithromycin<br>E5                        | VialCode: ZC03488591<br>Cat. No. : HY-116035<br>Nimbolide<br>E6      | VialCode: ZC03488618<br>Cat. No. : HY-153886<br>Wu-5<br>E7                 | VialCode: ZC03488653<br>Cat. No. : HY-17589B<br>Chloroquine (dihydrochloride)<br>E8 | VialCode: ZC03488669<br>Cat. No. : HY-148514<br>CT52923<br>E9                             | VialCode: ZC03488610<br>Cat. No. : HY-164307<br>Pebezzetinib<br>E10 | VialCode: ZC03488661<br>Cat. No. : HY-101820<br>Simotinib<br>E11                    | Empty<br>E12 |
| F | Empty<br>F1 | VialCode: ZC03488581<br>Cat. No. : HY-13246<br>Apatolisib<br>F2                   | VialCode: ZC03488583<br>Cat. No. : HY-50946<br>Imatinib (Mesylate)<br>F3            | VialCode: ZC03488646<br>Cat. No. : HY-A0067<br>Oxybenzone<br>F4               | VialCode: ZC03488575<br>Cat. No. : HY-50683<br>JNJ-38877605<br>F5                          | VialCode: ZC03488589<br>Cat. No. : HY-13606<br>Dacinostat<br>F6      | VialCode: ZC03488607<br>Cat. No. : HY-133780<br>Afatinib impurity 11<br>F7 | VialCode: ZC03488604<br>Cat. No. : HY-B1392<br>Esmolol (hydrochloride)<br>F8        | VialCode: ZC03488615<br>Cat. No. : HY-15506<br>TAK-593<br>F9                              | VialCode: ZC03488596<br>Cat. No. : HY-16379<br>Pacritinib<br>F10    | VialCode: ZC03488609<br>Cat. No. : HY-148036<br>FLT3-IN-16<br>F11                   | Empty<br>F12 |
| G | Empty<br>G1 | VialCode: ZC03488587<br>Cat. No. : HY-19912<br>Fruquintinib<br>G2                 | VialCode: ZC03488579<br>Cat. No. : HY-12297<br>Sulfatinib<br>G3                     | VialCode: ZC03488605<br>Cat. No. : HY-18690A<br>Enasidenib (mesylate)<br>G4   | VialCode: ZC03488597<br>Cat. No. : HY-136859<br>BATCP<br>G5                                | VialCode: ZC03488654<br>Cat. No. : HY-B0243<br>Meprednisone<br>G6    | VialCode: ZC03488662<br>Cat. No. : HY-10530<br>Varlitinib<br>G7            | VialCode: ZC03488638<br>Cat. No. : HY-12432A<br>Gilteritinib hemifumarate<br>G8     | VialCode: ZC03488636<br>Cat. No. : HY-135815A<br>Mobocertinib (succinate)<br>G9           | VialCode: ZC03488628<br>Cat. No. : HY-100748<br>Zabadinostat<br>G10 | VialCode: ZC03488617<br>Cat. No. : HY-P1401<br>Protein Kinase C (19-36)<br>G11      | Empty<br>G12 |
| H | Empty<br>H1 | VialCode: ZC03488629<br>Cat. No. : HY-Y1269<br>Ammonium chloride, AR, 99.5%<br>H2 | VialCode: ZC03488621<br>Cat. No. : HY-112823B<br>Almonertinib (hydrochloride)<br>H3 | VialCode: ZC03488613<br>Cat. No. : HY-B0223<br>Albendazole<br>H4              | VialCode: ZC03488637<br>Cat. No. : HY-15856B<br>Flupentixol (dihydrochloride)<br>H5        | VialCode: ZC03488616<br>Cat. No. : HY-138696<br>Zanzalintinib<br>H6  | VialCode: ZC03488608<br>Cat. No. : HY-18213<br>EGFR-IN-9<br>H7             | VialCode: ZC03488635<br>Cat. No. : HY-B1490<br>Impipramine (hydrochloride)<br>H8    | VialCode: ZC03488627<br>Cat. No. : HY-13075<br>c-Fms-IN-3<br>H9                           | VialCode: ZC03488633<br>Cat. No. : HY-B0923<br>Danthron<br>H10      | VialCode: ZC03488625<br>Cat. No. : HY-124526<br>Chlauranib<br>H11                   | Empty<br>H12 |

# 08

Compound Library Layout: Rack FK00086519 (DMSO Solution, 10 mM, 80 Compounds)



|   | 1           | 2                                                                       | 3                                                                      | 4                                                                         | 5                                                                    | 6                                                                         | 7                                                           | 8                                                                            | 9                                                                            | 10                                                                   | 11                                                                                  | 12           |
|---|-------------|-------------------------------------------------------------------------|------------------------------------------------------------------------|---------------------------------------------------------------------------|----------------------------------------------------------------------|---------------------------------------------------------------------------|-------------------------------------------------------------|------------------------------------------------------------------------------|------------------------------------------------------------------------------|----------------------------------------------------------------------|-------------------------------------------------------------------------------------|--------------|
| A | Empty<br>A1 | VialCode: ZC03410124<br>Cat. No.: HY-13078<br>Cobimetinib (racemate)    | VialCode: ZC03410116<br>Cat. No.: HY-18767<br>Ivosidenib               | VialCode: ZC03410114<br>Cat. No.: HY-13026<br>Idelalisib                  | VialCode: ZC03410109<br>Cat. No.: HY-10005<br>Flavopiridol           | VialCode: ZC03410102<br>Cat. No.: HY-50878A<br>Crizotinib (hydrochloride) | VialCode: ZC03410101<br>Cat. No.: HY-15900<br>Voxtalisib    | VialCode: ZC03410111<br>Cat. No.: HY-13427<br>Allitinib tosylate             | VialCode: ZC03410110<br>Cat. No.: HY-10474<br>Torkinib                       | VialCode: ZC03410113<br>Cat. No.: HY-112823<br>Almonertinib          | VialCode: ZC03410112<br>Cat. No.: HY-N6017<br>Bakkenolide A                         | Empty<br>A12 |
| B | Empty<br>B1 | VialCode: ZC03410108<br>Cat. No.: HY-19745A<br>N-deacetylated BMS-2 02  | VialCode: ZC03410096<br>Cat. No.: HY-W018326<br>Temozolomide acid      | VialCode: ZC03410107<br>Cat. No.: HY-125510<br>UNC2541                    | VialCode: ZC03410106<br>Cat. No.: HY-11080<br>PKI-179                | VialCode: ZC03410104<br>Cat. No.: HY-12513<br>Samotolisib                 | VialCode: ZC03410103<br>Cat. No.: HY-B0263<br>Thiabendazole | VialCode: ZC03410100<br>Cat. No.: HY-16297<br>Abemaciclib (methanesulfonate) | VialCode: ZC03410099<br>Cat. No.: HY-114226<br>Olutasidenib                  | VialCode: ZC03410098<br>Cat. No.: HY-100022<br>Tomivosertib          | VialCode: ZC03410097<br>Cat. No.: HY-15391<br>Lucitanib                             | Empty<br>B12 |
| C | Empty<br>C1 | VialCode: ZC03488663<br>Cat. No.: HY-19985<br>PF-06459988               | VialCode: ZC03488640<br>Cat. No.: HY-115570<br>GW406108X               | VialCode: ZC03488655<br>Cat. No.: HY-122593<br>PI3Kδ-IN-5                 | VialCode: ZC03410105<br>Cat. No.: HY-15336<br>AG 555                 | VialCode: ZC03410095<br>Cat. No.: HY-N11692<br>9-Hydroxyoctadecanoic acid | VialCode: ZC03410094<br>Cat. No.: HY-13272<br>Dacomitinib   | VialCode: ZC03410093<br>Cat. No.: HY-32718<br>Pelitinib                      | VialCode: ZC03488648<br>Cat. No.: HY-100064<br>O-Desmethyl gefitinib         | VialCode: ZC03488659<br>Cat. No.: HY-13314<br>Tesevatinib            | VialCode: ZC03488667<br>Cat. No.: HY-13404C<br>Capmatinib (dihydrochloride hydrate) | Empty<br>C12 |
| D | Empty<br>D1 | VialCode: ZC03488665<br>Cat. No.: HY-N0112<br>Dihydropyridazinone       | VialCode: ZC03488619<br>Cat. No.: HY-15959<br>Savolitinib              | VialCode: ZC03488606<br>Cat. No.: HY-100019<br>Rogaratinib                | VialCode: ZC03488614<br>Cat. No.: HY-B0774<br>Seratrodast            | VialCode: ZC03488692<br>Cat. No.: HY-B0380A<br>Trimebutine (maleate)      | VialCode: ZC03488600<br>Cat. No.: HY-19535A<br>Nemiralisib  | VialCode: ZC03488643<br>Cat. No.: HY-N1487<br>Oleanonic acid                 | VialCode: ZC03488611<br>Cat. No.: HY-10255<br>Sunitinib (Malate)             | VialCode: ZC03488651<br>Cat. No.: HY-13068<br>Golvatinib             | VialCode: ZC03488676<br>Cat. No.: HY-15772A<br>Osimertinib (mesylate)               | Empty<br>D12 |
| E | Empty<br>E1 | VialCode: ZC03410151<br>Cat. No.: HY-12009<br>Pazopanib (Hydrochloride) | VialCode: ZC03410150<br>Cat. No.: HY-18690<br>Enasidenib               | VialCode: ZC03410149<br>Cat. No.: HY-10218<br>Everolimus                  | VialCode: ZC03410148<br>Cat. No.: HY-10065<br>Axitinib               | VialCode: ZC03410147<br>Cat. No.: HY-10209A<br>Masitinib (mesylate)       | VialCode: ZC03410154<br>Cat. No.: HY-15271<br>WYE-687       | VialCode: ZC03410152<br>Cat. No.: HY-13050<br>Sapitinib                      | VialCode: ZC03410156<br>Cat. No.: HY-12652<br>AZD3147                        | VialCode: ZC03410153<br>Cat. No.: HY-10255A<br>Sunitinib             | VialCode: ZC03410155<br>Cat. No.: HY-15777A<br>Ribociclib hydrochloride             | Empty<br>E12 |
| F | Empty<br>F1 | VialCode: ZC03410137<br>Cat. No.: HY-10201<br>Sorafenib                 | VialCode: ZC03410136<br>Cat. No.: HY-15164<br>Icotinib (Hydrochloride) | VialCode: ZC03410135<br>Cat. No.: HY-13064A<br>Cobimetinib (hemifumarate) | VialCode: ZC03410146<br>Cat. No.: HY-17632<br>Tarloxotinib (bromide) | VialCode: ZC03410145<br>Cat. No.: HY-10981A<br>Lenvatinib (mesylate)      | VialCode: ZC03410144<br>Cat. No.: HY-N0776<br>Isorhamnetin  | VialCode: ZC03410143<br>Cat. No.: HY-103032<br>Multi-kinase inhibitor 1      | VialCode: ZC03410142<br>Cat. No.: HY-153110A<br>Larotinib (mesylate hydrate) | VialCode: ZC03410141<br>Cat. No.: HY-N7676<br>Marein                 | VialCode: ZC03410127<br>Cat. No.: HY-10202A<br>Tandutinib (hydrochloride)           | Empty<br>F12 |
| G | Empty<br>G1 | VialCode: ZC03410131<br>Cat. No.: HY-18750<br>Zorifentib                | VialCode: ZC03410123<br>Cat. No.: HY-N2510<br>Myristicin               | VialCode: ZC03410126<br>Cat. No.: HY-10517A<br>(Z)-Orantinib              | VialCode: ZC03410125<br>Cat. No.: HY-10191<br>Linsitinib             | VialCode: ZC03410128<br>Cat. No.: HY-B0260<br>Methylprednisolone          | VialCode: ZC03410139<br>Cat. No.: HY-N1050<br>Zederone      | VialCode: ZC03410140<br>Cat. No.: HY-10247<br>BRAF inhibitor                 | VialCode: ZC03410138<br>Cat. No.: HY-18980<br>Rottlerin                      | VialCode: ZC03410134<br>Cat. No.: HY-128333<br>PI3K/mTOR Inhibitor-4 | VialCode: ZC03410133<br>Cat. No.: HY-102031<br>Linperlisib                          | Empty<br>G12 |
| H | Empty<br>H1 | VialCode: ZC03410130<br>Cat. No.: HY-A0065<br>Palbociclib (isethionate) | VialCode: ZC03410129<br>Cat. No.: HY-13676<br>Megestrol acetate        | VialCode: ZC03410132<br>Cat. No.: HY-114189<br>GW284543                   | VialCode: ZC03410122<br>Cat. No.: HY-N0221<br>Daurisoline            | VialCode: ZC03410121<br>Cat. No.: HY-W001925<br>7-Methoxy-1-tetralone     | VialCode: ZC03410120<br>Cat. No.: HY-13691<br>MKC-1         | VialCode: ZC03410119<br>Cat. No.: HY-10424<br>Milciciclib                    | VialCode: ZC03410118<br>Cat. No.: HY-15180<br>Buparlisib (Hydrochloride)     | VialCode: ZC03410117<br>Cat. No.: HY-132295<br>Azenosertib           | VialCode: ZC03410115<br>Cat. No.: HY-14718A<br>Resminostat (hydrochloride)          | Empty<br>H12 |

# 09

Compound Library Layout: Rack FK00074786 (DMSO Solution, 10 mM, 80 Compounds)



|   | 1           | 2                                                                         | 3                                                                                | 4                                                                        | 5                                                                     | 6                                                                    | 7                                                             | 8                                                                        | 9                                                                          | 10                                                                    | 11                                                                         | 12           |
|---|-------------|---------------------------------------------------------------------------|----------------------------------------------------------------------------------|--------------------------------------------------------------------------|-----------------------------------------------------------------------|----------------------------------------------------------------------|---------------------------------------------------------------|--------------------------------------------------------------------------|----------------------------------------------------------------------------|-----------------------------------------------------------------------|----------------------------------------------------------------------------|--------------|
| A | Empty<br>A1 | VialCode: ZC03505341<br>Cat. No.: HY-114166<br>2-D08                      | VialCode: ZC03505333<br>Cat. No.: HY-10977A<br>Tivozanib (hydrochloride hydrate) | VialCode: ZC03505317<br>Cat. No.: HY-16754<br>Seletalisib                | VialCode: ZC03505325<br>Cat. No.: HY-139300A<br>Eplitinib (succinate) | VialCode: ZC03505372<br>Cat. No.: HY-11106<br>Nintedanib esylate     | VialCode: ZC03505364<br>Cat. No.: HY-10333<br>BMS-690514      | VialCode: ZC03505356<br>Cat. No.: HY-12010<br>BMS-599626 (Hydrochloride) | VialCode: ZC03505300<br>Cat. No.: HY-15590<br>AZ-23                        | VialCode: ZC03505292<br>Cat. No.: HY-16962A<br>CC-115 (hydrochloride) | VialCode: ZC03505284<br>Cat. No.: HY-158059<br>DS-1-38                     | Empty<br>A12 |
| B | Empty<br>B1 | VialCode: ZC03505340<br>Cat. No.: HY-15514A<br>Merestinin dihydrochloride | VialCode: ZC03505332<br>Cat. No.: HY-12279<br>Umbralisib                         | VialCode: ZC03505324<br>Cat. No.: HY-N6996<br>Methyl Eugenol             | VialCode: ZC03505316<br>Cat. No.: HY-101569<br>Darovasertib           | VialCode: ZC03505348<br>Cat. No.: HY-10542<br>GW 5074                | VialCode: ZC03505308<br>Cat. No.: HY-153111<br>EGFR/HER2-IN-9 | VialCode: ZC03505299<br>Cat. No.: HY-156467<br>Neladalkib                | VialCode: ZC03505291<br>Cat. No.: HY-50767C<br>Palbociclib (hydrochloride) | VialCode: ZC03505283<br>Cat. No.: HY-123952<br>RTC-5                  | VialCode: ZC03505371<br>Cat. No.: HY-50910<br>Temsirrolimus                | Empty<br>B12 |
| C | Empty<br>C1 | VialCode: ZC03505363<br>Cat. No.: HY-15841<br>CEP-37440                   | VialCode: ZC03505355<br>Cat. No.: HY-100603<br>GSK-F1                            | VialCode: ZC03505347<br>Cat. No.: HY-B0185A<br>Lidocaine (hydrochloride) | VialCode: ZC03505339<br>Cat. No.: HY-15246<br>Tovorafenib             | VialCode: ZC03505331<br>Cat. No.: HY-W340313<br>p53-MDM2-IN-4        | VialCode: ZC03505362<br>Cat. No.: HY-N0211<br>Cyasterone      | VialCode: ZC03505354<br>Cat. No.: HY-12423<br>Pamufetinib                | VialCode: ZC03505323<br>Cat. No.: HY-100509<br>NPS-1034                    | VialCode: ZC03505315<br>Cat. No.: HY-10044<br>WYE-132                 | VialCode: ZC03505307<br>Cat. No.: HY-U00437<br>Pz-1                        | Empty<br>C12 |
| D | Empty<br>D1 | VialCode: ZC03505298<br>Cat. No.: HY-19897<br>4SC-203                     | VialCode: ZC03505290<br>Cat. No.: HY-12872<br>Nazartinib                         | VialCode: ZC03505282<br>Cat. No.: HY-13502<br>Mitoxantrone               | VialCode: ZC03505314<br>Cat. No.: HY-16526<br>Pilaralisib             | VialCode: ZC03505306<br>Cat. No.: HY-135317<br>Emavusertib           | VialCode: ZC03505346<br>Cat. No.: HY-102011<br>BMS-1166       | VialCode: ZC03505322<br>Cat. No.: HY-108418<br>PI3Kδ-IN-15               | VialCode: ZC03505338<br>Cat. No.: HY-149631<br>HFY-4A                      | VialCode: ZC03505330<br>Cat. No.: HY-15174<br>Dactolisib (Tosylate)   | VialCode: ZC03505370<br>Cat. No.: HY-114303<br>CM-675                      | Empty<br>D12 |
| E | Empty<br>E1 | VialCode: ZC03410165<br>Cat. No.: HY-12037<br>Rigosertib (sodium)         | VialCode: ZC03410166<br>Cat. No.: HY-B0446<br>Naphazoline (hydrochloride)        | VialCode: ZC03410160<br>Cat. No.: HY-15730<br>Pozitiotinib               | VialCode: ZC03410161<br>Cat. No.: HY-138627A<br>AST5902 (trimesylate) | VialCode: ZC03410157<br>Cat. No.: HY-12948<br>AMG319                 | VialCode: ZC03410158<br>Cat. No.: HY-15605<br>Encorafenib     | VialCode: ZC03410159<br>Cat. No.: HY-15494<br>Picropodophyllin           | VialCode: ZC03410162<br>Cat. No.: HY-10225<br>Belinostat                   | VialCode: ZC03410163<br>Cat. No.: HY-N1435<br>Oroxin B                | VialCode: ZC03410164<br>Cat. No.: HY-13203<br>NVP-TAE 226                  | Empty<br>E12 |
| F | Empty<br>F1 | VialCode: ZC03410180<br>Cat. No.: HY-131345<br>PI3Kα-IN-4                 | VialCode: ZC03410169<br>Cat. No.: HY-10207<br>Dovitinib (lactate)                | VialCode: ZC03410172<br>Cat. No.: HY-N0824<br>Syringin                   | VialCode: ZC03410170<br>Cat. No.: HY-12044<br>Cabozantinib (S-malate) | VialCode: ZC03410171<br>Cat. No.: HY-107459<br>(E/Z)-AG490           | VialCode: ZC03410173<br>Cat. No.: HY-12215<br>Lorlatinib      | VialCode: ZC03410181<br>Cat. No.: HY-B0494<br>Bufexamac                  | VialCode: ZC03410188<br>Cat. No.: HY-118704<br>P-2281                      | VialCode: ZC03410167<br>Cat. No.: HY-12038<br>K18751                  | VialCode: ZC03410168<br>Cat. No.: HY-15727A<br>Afuresertib (hydrochloride) | Empty<br>F12 |
| G | Empty<br>G1 | VialCode: ZC03410187<br>Cat. No.: HY-32721B<br>Neratinib (maleate)        | VialCode: ZC03410178<br>Cat. No.: HY-136362<br>ARRY-382                          | VialCode: ZC03410186<br>Cat. No.: HY-N2517<br>Dihydroevocarpine          | VialCode: ZC03410177<br>Cat. No.: HY-50514<br>AT9283                  | VialCode: ZC03410185<br>Cat. No.: HY-50706A<br>Selumetinib (sulfate) | VialCode: ZC03410175<br>Cat. No.: HY-B0246<br>Carbamazepine   | VialCode: ZC03410183<br>Cat. No.: HY-18717<br>Mutant IDH1-IN-2           | VialCode: ZC03410174<br>Cat. No.: HY-N0416<br>Cucurbitacin B               | VialCode: ZC03410179<br>Cat. No.: HY-10248<br>RAF265                  | VialCode: ZC03410182<br>Cat. No.: HY-15777<br>Ribociclib                   | Empty<br>G12 |
| H | Empty<br>H1 | VialCode: ZC03505357<br>Cat. No.: HY-10977<br>Tivozanib                   | VialCode: ZC03505349<br>Cat. No.: HY-157413<br>YS-67                             | VialCode: ZC03505309<br>Cat. No.: HY-111326A<br>Naphazoline (nitrate)    | VialCode: ZC03505301<br>Cat. No.: HY-137433<br>Befotertinib           | VialCode: ZC03505293<br>Cat. No.: HY-19803<br>Naquotinib (mesylate)  | VialCode: ZC03505373<br>Cat. No.: HY-N0017<br>Bergenin        | VialCode: ZC03505285<br>Cat. No.: HY-100499<br>Tyrphostin AG 528         | VialCode: ZC03505365<br>Cat. No.: HY-150082<br>CP681301                    | VialCode: ZC03410176<br>Cat. No.: HY-D0803<br>Thymoquinone            | VialCode: ZC03410184<br>Cat. No.: HY-W009732<br>Sinapinic acid             | Empty<br>H12 |

# 10

Compound Library Layout: Rack FK00235189 (DMSO Solution, 10 mM, 80 Compounds)



|   | 1           | 2                                                                         | 3                                                                          | 4                                                                      | 5                                                                                  | 6                                                                            | 7                                                                       | 8                                                                          | 9                                                                         | 10                                                        | 11                                                               | 12           |
|---|-------------|---------------------------------------------------------------------------|----------------------------------------------------------------------------|------------------------------------------------------------------------|------------------------------------------------------------------------------------|------------------------------------------------------------------------------|-------------------------------------------------------------------------|----------------------------------------------------------------------------|---------------------------------------------------------------------------|-----------------------------------------------------------|------------------------------------------------------------------|--------------|
| A | Empty<br>A1 | VialCode: ZC03505303<br>Cat. No.: HY-125927<br>8-Aminoadenosine           | VialCode: ZC03505311<br>Cat. No.: HY-111050<br>JNJ-38877618                | VialCode: ZC03505319<br>Cat. No.: HY-41648<br>IDH1 Inhibitor 8         | VialCode: ZC03505342<br>Cat. No.: HY-13034<br>Gandotinib                           | VialCode: ZC03505366<br>Cat. No.: HY-109099<br>Pemigatinib                   | VialCode: ZC03505358<br>Cat. No.: HY-162143<br>SKI-349                  | VialCode: ZC03505327<br>Cat. No.: HY-10987A<br>ENMD-2076                   | VialCode: ZC03505335<br>Cat. No.: HY-101774<br>CSF1R-IN-1                 | VialCode: ZC03505343<br>Cat. No.: HY-B0185<br>Lidocaine   | VialCode: ZC03505350<br>Cat. No.: HY-15272<br>WAY-600            | Empty<br>A12 |
| B | Empty<br>B1 | VialCode: ZC03505279<br>Cat. No.: HY-N6772<br>Cytochalasin E              | VialCode: ZC03505287<br>Cat. No.: HY-N2344<br>Procyanidin A1               | VialCode: ZC03505295<br>Cat. No.: HY-103706<br>ROC-325                 | VialCode: ZC03505351<br>Cat. No.: HY-108333<br>SB-633825                           | VialCode: ZC03505359<br>Cat. No.: HY-10195B<br>Ruboxistaurin (hydrochloride) | VialCode: ZC03505367<br>Cat. No.: HY-153920<br>Pimicotinib              | VialCode: ZC03505304<br>Cat. No.: HY-12768A<br>Sotuletinib (hydrochloride) | VialCode: ZC03505312<br>Cat. No.: HY-117155<br>PKI-166                    | VialCode: ZC03505320<br>Cat. No.: HY-139604<br>PCC0208017 | VialCode: ZC03505336<br>Cat. No.: HY-15245<br>GSK2636771         | Empty<br>B12 |
| C | Empty<br>C1 | VialCode: ZC03505321<br>Cat. No.: HY-129545<br>DS-1001b                   | VialCode: ZC03505280<br>Cat. No.: HY-112455<br>cFMS Receptor Inhibitor IV  | VialCode: ZC03505288<br>Cat. No.: HY-50896<br>Erlotinib                | VialCode: ZC03505296<br>Cat. No.: HY-132242<br>DL-Sulforaphane N-acetyl-L-cysteine | VialCode: ZC03505328<br>Cat. No.: HY-112545<br>DDR2-IN-1                     | VialCode: ZC03505344<br>Cat. No.: HY-106012<br>PI4K-IN-1                | VialCode: ZC03505352<br>Cat. No.: HY-135318<br>NBDHEX                      | VialCode: ZC03505360<br>Cat. No.: HY-B0023<br>Azelnidipine                | VialCode: ZC03505368<br>Cat. No.: HY-N0484<br>Liensinine  | VialCode: ZC03505313<br>Cat. No.: HY-15813<br>FIIN-1             | Empty<br>C12 |
| D | Empty<br>D1 | VialCode: ZC03505369<br>Cat. No.: HY-19617B<br>EGFR-IN-1 (TFA)            | VialCode: ZC03505281<br>Cat. No.: HY-16018A<br>Ilorasertib (hydrochloride) | VialCode: ZC03505289<br>Cat. No.: HY-19624<br>NVP-ACC789               | VialCode: ZC03505297<br>Cat. No.: HY-17506<br>Azithromycin                         | VialCode: ZC03505305<br>Cat. No.: HY-124502<br>UNC4203                       | VialCode: ZC03505329<br>Cat. No.: HY-10341<br>Fasudil (Hydrochloride)   | VialCode: ZC03505337<br>Cat. No.: HY-125169<br>NSC 185058                  | VialCode: ZC03505345<br>Cat. No.: HY-156432<br>ALK-IN-26                  | VialCode: ZC03505353<br>Cat. No.: HY-148907<br>CS640      | VialCode: ZC03505361<br>Cat. No.: HY-17507<br>Pantoprazole       | Empty<br>D12 |
| E | Empty<br>E1 | VialCode: ZC03583134<br>Cat. No.: HY-17635A<br>Leniolisib (phosphate)     | VialCode: ZC03483435<br>Cat. No.: HY-13330<br>Fexagratinib                 | VialCode: ZC03468145<br>Cat. No.: HY-13216<br>Pyroxamide               | VialCode: ZC03583078<br>Cat. No.: HY-N0189<br>Aloe emodin                          | VialCode: ZC03583086<br>Cat. No.: HY-13522<br>Fimepinostat                   | VialCode: ZC03583094<br>Cat. No.: HY-14286<br>Levosimendan              | VialCode: ZC03483401<br>Cat. No.: HY-101920<br>Autophinib                  | VialCode: ZC03583111<br>Cat. No.: HY-P10436<br>Braftide                   | VialCode: ZC03583119<br>Cat. No.: HY-112272<br>Lerociclib | VialCode: ZC03505294<br>Cat. No.: HY-108444<br>(Z)-FeCP-oxindole | Empty<br>E12 |
| F | Empty<br>F1 | VialCode: ZC03483427<br>Cat. No.: HY-15758<br>3,3'-Diindolylmethane       | VialCode: ZC03483434<br>Cat. No.: HY-101931<br>hVEGF-IN-1                  | VialCode: ZC03468156<br>Cat. No.: HY-10812<br>GNE-490                  | VialCode: ZC03483393<br>Cat. No.: HY-122022<br>JR-AB2-011                          | VialCode: ZC03583079<br>Cat. No.: HY-156912<br>Tyrosine kinase-IN-7          | VialCode: ZC03583095<br>Cat. No.: HY-109109<br>Alteminostat             | VialCode: ZC03583087<br>Cat. No.: HY-50895<br>Gefitinib                    | VialCode: ZC03583135<br>Cat. No.: HY-B0957<br>Erythromycin Ethylsuccinate | VialCode: ZC03483426<br>Cat. No.: HY-13304<br>LY2874455   | VialCode: ZC03583127<br>Cat. No.: HY-18609<br>PD158780           | Empty<br>F12 |
| G | Empty<br>G1 | VialCode: ZC03583103<br>Cat. No.: HY-107367A<br>Epertinib (hydrochloride) | VialCode: ZC03583112<br>Cat. No.: HY-10981<br>Lenvatinib                   | VialCode: ZC03583120<br>Cat. No.: HY-100719<br>BRD-6929                | VialCode: ZC03576434<br>Cat. No.: HY-148877<br>AT-533                              | VialCode: ZC03583088<br>Cat. No.: HY-12055<br>BIX02188                       | VialCode: ZC03583096<br>Cat. No.: HY-14596<br>Genistein                 | VialCode: ZC03583104<br>Cat. No.: HY-152839<br>Elenestinin                 | VialCode: ZC03583136<br>Cat. No.: HY-15198<br>KG5                         | VialCode: ZC03483394<br>Cat. No.: HY-115461<br>MID-1      | VialCode: ZC03583080<br>Cat. No.: HY-10109<br>AS-605240          | Empty<br>G12 |
| H | Empty<br>H1 | VialCode: ZC03483418<br>Cat. No.: HY-10993<br>Adavosertib                 | VialCode: ZC03505310<br>Cat. No.: HY-160811<br>hVEGF-IN-3                  | VialCode: ZC03483402<br>Cat. No.: HY-N0289<br>Lycorine (hydrochloride) | VialCode: ZC03483410<br>Cat. No.: HY-12031<br>U0126-EtOH                           | VialCode: ZC03505278<br>Cat. No.: HY-136660<br>PQR626                        | VialCode: ZC03505286<br>Cat. No.: HY-12572<br>TIE-2/VEGFR-2 kinase-IN-2 | VialCode: ZC03505318<br>Cat. No.: HY-W011209<br>N6-Isopentenyladenosine    | VialCode: ZC03505334<br>Cat. No.: HY-12291<br>HG6-64-1                    | VialCode: ZC03505302<br>Cat. No.: HY-123673<br>MCP110     | VialCode: ZC03505326<br>Cat. No.: HY-15164A<br>Icotinib          | Empty<br>H12 |

# 11

Compound Library Layout: Rack FK00238176 (DMSO Solution, 10 mM, 80 Compounds)



|   | 1           | 2                                                                      | 3                                                                      | 4                                                                         | 5                                                                                 | 6                                                              | 7                                                                                | 8                                                                         | 9                                                              | 10                                                                           | 11                                                                      | 12           |
|---|-------------|------------------------------------------------------------------------|------------------------------------------------------------------------|---------------------------------------------------------------------------|-----------------------------------------------------------------------------------|----------------------------------------------------------------|----------------------------------------------------------------------------------|---------------------------------------------------------------------------|----------------------------------------------------------------|------------------------------------------------------------------------------|-------------------------------------------------------------------------|--------------|
| A | Empty<br>A1 | VialCode: ZC03583075<br>Cat. No.: HY-10521<br>Darapladib               | VialCode: ZC03583083<br>Cat. No.: HY-133124<br>PARP/PI3K-IN-1          | VialCode: ZC03583091<br>Cat. No.: HY-50943<br>AT7519<br>(Hydrochloride)   | VialCode: ZC03686109<br>Cat. No.: HY-12855A<br>Lys05                              | VialCode: ZC03483428<br>Cat. No.: HY-16592<br>Brefeldin A      | VialCode: ZC03483436<br>Cat. No.: HY-118532<br>Tyrrhostin AG30                   | VialCode: ZC03583107<br>Cat. No.: HY-A0077<br>Perphenazine                | VialCode: ZC03583115<br>Cat. No.: HY-B0671<br>Vancomycin       | VialCode: ZC03583123<br>Cat. No.: HY-15431<br>Capivasertib                   | VialCode: ZC03583099<br>Cat. No.: HY-162147<br>Nur77 modulator 3        | Empty<br>A12 |
| B | Empty<br>B1 | VialCode: ZC03583076<br>Cat. No.: HY-N0453<br>Hypericin                | VialCode: ZC03583116<br>Cat. No.: HY-11080A<br>PKI-179 (hydrochloride) | VialCode: ZC03483433<br>Cat. No.: HY-12018<br>Vatalanib (dihydrochloride) | VialCode: ZC03583124<br>Cat. No.: HY-135827<br>Roginolisib                        | VialCode: ZC03455990<br>Cat. No.: HY-12475<br>Mutant IDH1-IN-1 | VialCode: ZC03583092<br>Cat. No.: HY-139558<br>Zapnometinib                      | VialCode: ZC03583084<br>Cat. No.: HY-12422A<br>Voruciclib (hydrochloride) | VialCode: ZC03583100<br>Cat. No.: HY-143412<br>MIR002          | VialCode: ZC03583108<br>Cat. No.: HY-117393<br>Bisindolylmaleimide III       | VialCode: ZC03483396<br>Cat. No.: HY-100871<br>WT-161                   | Empty<br>B12 |
| C | Empty<br>C1 | VialCode: ZC03483404<br>Cat. No.: HY-10338<br>Foretinib                | VialCode: ZC03583077<br>Cat. No.: HY-100026<br>PQR620                  | VialCode: ZC03583085<br>Cat. No.: HY-18713<br>CRT0066854                  | VialCode: ZC03583093<br>Cat. No.: HY-129440<br>N-(p-Coumaroyl) Sero tonin         | VialCode: ZC03583101<br>Cat. No.: HY-139450<br>Atimociclib     | VialCode: ZC03583109<br>Cat. No.: HY-N6739<br>Beauvericin                        | VialCode: ZC03583117<br>Cat. No.: HY-109061<br>Lazertinib                 | VialCode: ZC03483412<br>Cat. No.: HY-11108<br>R406 (free base) | VialCode: ZC03483420<br>Cat. No.: HY-15433A<br>Quisinostat (dihydrochloride) | VialCode: ZC03483425<br>Cat. No.: HY-18361<br>TMP195                    | Empty<br>C12 |
| D | Empty<br>D1 | VialCode: ZC03483395<br>Cat. No.: HY-103248<br>Toyocamycin             | VialCode: ZC03583102<br>Cat. No.: HY-110135<br>NBI-31772               | VialCode: ZC03583110<br>Cat. No.: HY-109019<br>Vorolanib                  | VialCode: ZC03583118<br>Cat. No.: HY-13735B<br>Quinacrine (hydrochloride hydrate) | VialCode: ZC03583126<br>Cat. No.: HY-133907<br>NVS-PI3-4       | VialCode: ZC03483403<br>Cat. No.: HY-15734<br>AGI-6780                           | VialCode: ZC03483411<br>Cat. No.: HY-15177<br>PF-04691502                 | VialCode: ZC03483417<br>Cat. No.: HY-12068<br>PI3K-IN-1        | VialCode: ZC03583125<br>Cat. No.: HY-110280<br>MC1742                        | VialCode: ZC03583133<br>Cat. No.: HY-112301<br>Pralsetinib              | Empty<br>D12 |
| E | Empty<br>E1 | VialCode: ZC03610526<br>Cat. No.: HY-109020<br>Acrizanib               | VialCode: ZC03610541<br>Cat. No.: HY-141882<br>DC-LC3in-D5             | VialCode: ZC03610533<br>Cat. No.: HY-10367<br>Canertinib                  | VialCode: ZC03610525<br>Cat. No.: HY-12953<br>R-268712                            | VialCode: ZC03610565<br>Cat. No.: HY-19824<br>3PO              | VialCode: ZC03610557<br>Cat. No.: HY-111787<br>Elzovantinib                      | VialCode: ZC03610549<br>Cat. No.: HY-152852A<br>Mefatinib                 | VialCode: ZC03610518<br>Cat. No.: HY-100385<br>Brevianamide F  | VialCode: ZC03610510<br>Cat. No.: HY-155285<br>YS-363                        | VialCode: ZC03610502<br>Cat. No.: HY-15729A<br>Rociletinib hydrobromide | Empty<br>E12 |
| F | Empty<br>F1 | VialCode: ZC03583097<br>Cat. No.: HY-13267<br>Droxinostat              | VialCode: ZC03583105<br>Cat. No.: HY-131910A<br>(R)-IHMT-PI3Kδ-372     | VialCode: ZC03583113<br>Cat. No.: HY-155163<br>APG-2449                   | VialCode: ZC03583121<br>Cat. No.: HY-12060<br>KRN-633                             | VialCode: ZC03610517<br>Cat. No.: HY-150879<br>BMS-37          | VialCode: ZC03610509<br>Cat. No.: HY-B0185B<br>Lidocaine (hydrochloride hydrate) | VialCode: ZC03610501<br>Cat. No.: HY-120635<br>BMS-1001 (hydrochloride)   | VialCode: ZC03610589<br>Cat. No.: HY-16699<br>Nexturastat A    | VialCode: ZC03610581<br>Cat. No.: HY-156625<br>Nedometinib                   | VialCode: ZC03610573<br>Cat. No.: HY-101058A<br>PD1-PDL1-IN 1 (TFA)     | Empty<br>F12 |
| G | Empty<br>G1 | VialCode: ZC03583106<br>Cat. No.: HY-16122B<br>CAL-130 (Hydrochloride) | VialCode: ZC03483429<br>Cat. No.: HY-116522<br>AR420626                | VialCode: ZC03583073<br>Cat. No.: HY-10261B<br>(E/Z)-Afatinib             | VialCode: ZC03483405<br>Cat. No.: HY-100398<br>PF-04979064                        | VialCode: ZC03583081<br>Cat. No.: HY-111383<br>LX2343          | VialCode: ZC03483419<br>Cat. No.: HY-50905<br>Dovitinib                          | VialCode: ZC03583089<br>Cat. No.: HY-118630<br>Vacuolin-1                 | VialCode: ZC03483413<br>Cat. No.: HY-13514<br>TG 100713        | VialCode: ZC03483421<br>Cat. No.: HY-18353<br>mTOR inhibitor-3               | VialCode: ZC03583098<br>Cat. No.: HY-10423<br>OSI-027                   | Empty<br>G12 |
| H | Empty<br>H1 | VialCode: ZC03583074<br>Cat. No.: HY-10224<br>Panobinostat             | VialCode: ZC03583082<br>Cat. No.: HY-19763<br>BEBT-908                 | VialCode: ZC03583090<br>Cat. No.: HY-117554<br>BRD9757                    | VialCode: ZC03583122<br>Cat. No.: HY-16446<br>SAR125844                           | VialCode: ZC03483445<br>Cat. No.: HY-13228<br>YM-201636        | VialCode: ZC03483444<br>Cat. No.: HY-112780<br>UC2288                            | VialCode: ZC03583156<br>Cat. No.: HY-104042<br>Vorasidenib                | VialCode: ZC03483437<br>Cat. No.: HY-12795<br>Vps34-IN-1       | VialCode: ZC03483397<br>Cat. No.: HY-10422<br>AZD-8055                       | VialCode: ZC03583114<br>Cat. No.: HY-18711<br>SCR-1481B1 (free base)    | Empty<br>H12 |

# 12

Compound Library Layout: Rack FK00236446 (DMSO Solution, 10 mM, 80 Compounds)



|   | 1           | 2                                                                             | 3                                                                          | 4                                                                               | 5                                                                                | 6                                                                           | 7                                                                         | 8                                                                | 9                                                                                 | 10                                                                      | 11                                                                          | 12           |
|---|-------------|-------------------------------------------------------------------------------|----------------------------------------------------------------------------|---------------------------------------------------------------------------------|----------------------------------------------------------------------------------|-----------------------------------------------------------------------------|---------------------------------------------------------------------------|------------------------------------------------------------------|-----------------------------------------------------------------------------------|-------------------------------------------------------------------------|-----------------------------------------------------------------------------|--------------|
| A | Empty<br>A1 | VialCode: ZC03610568<br>Cat. No.: HY-161025<br>SYHA1813                       | VialCode: ZC03610560<br>Cat. No.: HY-158310<br>SOS1/EGFR-IN-1              | VialCode: ZC03610561<br>Cat. No.: HY-18711A<br>SCR-1481B1                       | VialCode: ZC03610553<br>Cat. No.: HY-139535<br>Luxetpinib                        | VialCode: ZC03610545<br>Cat. No.: HY-162037<br>CDDD11-8                     | VialCode: ZC03610537<br>Cat. No.: HY-12202<br>MEK inhibitor               | VialCode: ZC03610529<br>Cat. No.: HY-13023<br>AMG-Tie2-1         | VialCode: ZC03610521<br>Cat. No.: HY-20180<br>Pictilisib (dimethan<br>esulfonate) | VialCode: ZC03610513<br>Cat. No.: HY-148314<br>ROS kinases-IN-2         | VialCode: ZC03610505<br>Cat. No.: HY-148507<br>GSK1790627                   | Empty<br>A12 |
| B | Empty<br>B1 | VialCode: ZC03610504<br>Cat. No.: HY-125741<br>GW768505A (free<br>base)       | VialCode: ZC03610592<br>Cat. No.: HY-107407<br>SB-218078                   | VialCode: ZC03610584<br>Cat. No.: HY-117583<br>cis-BG47                         | VialCode: ZC03610576<br>Cat. No.: HY-12333<br>Denfivontinib                      | VialCode: ZC03610552<br>Cat. No.: HY-103029<br>Bosutinib isomer             | VialCode: ZC03610544<br>Cat. No.: HY-17506A<br>Azithromycin (hydrat<br>e) | VialCode: ZC03610536<br>Cat. No.: HY-107619<br>PD-334581         | VialCode: ZC03610528<br>Cat. No.: HY-158115<br>NST-628                            | VialCode: ZC03610520<br>Cat. No.: HY-135815<br>Mobocertinib             | VialCode: ZC03610512<br>Cat. No.: HY-12990<br>Spatin-1                      | Empty<br>B12 |
| C | Empty<br>C1 | VialCode: ZC03610519<br>Cat. No.: HY-145120<br>B-Raf IN 2                     | VialCode: ZC03610591<br>Cat. No.: HY-13749A<br>Sitagliptin (phospha<br>te) | VialCode: ZC03610583<br>Cat. No.: HY-100459<br>GSK3179106                       | VialCode: ZC03610575<br>Cat. No.: HY-W013857<br>Lavendustin C                    | VialCode: ZC03610567<br>Cat. No.: HY-101549<br>MRX-2843                     | VialCode: ZC03610559<br>Cat. No.: HY-15798<br>UNC2881                     | VialCode: ZC03610551<br>Cat. No.: HY-156273<br>HDAC/JAK/BRD4-IN- | VialCode: ZC03610543<br>Cat. No.: HY-128340<br>Autogramin-2                       | VialCode: ZC03610535<br>Cat. No.: HY-112474<br>Tyrphostin AG 112        | VialCode: ZC03610527<br>Cat. No.: HY-147133<br>VEGFR2-IN-2                  | Empty<br>C12 |
| D | Empty<br>D1 | VialCode: ZC03610590<br>Cat. No.: HY-114339<br>CDK4/6-IN-2                    | VialCode: ZC03610582<br>Cat. No.: HY-115449<br>Chromeciptin                | VialCode: ZC03610574<br>Cat. No.: HY-15166B<br>(E/Z)-Zotiracilicb (<br>citrate) | VialCode: ZC03610511<br>Cat. No.: HY-N2575<br>Hypocrellin A                      | VialCode: ZC03610503<br>Cat. No.: HY-13904<br>Flumatinib                    | VialCode: ZC03610566<br>Cat. No.: HY-50878<br>Crizotinib                  | VialCode: ZC03610558<br>Cat. No.: HY-117548<br>UNC1062           | VialCode: ZC03610534<br>Cat. No.: HY-13299<br>MK-8033                             | VialCode: ZC03610550<br>Cat. No.: HY-108443<br>DMH4                     | VialCode: ZC03610542<br>Cat. No.: HY-115909<br>ZDLL20                       | Empty<br>D12 |
| E | Empty<br>E1 | VialCode: ZC03610596<br>Cat. No.: HY-109086<br>Edicotinib                     | VialCode: ZC03610508<br>Cat. No.: HY-50898A<br>Lapatinib (ditosylat<br>e)  | VialCode: ZC03610588<br>Cat. No.: HY-153915<br>PI3K $\alpha$ -IN-11             | VialCode: ZC03610540<br>Cat. No.: HY-N0730<br>Diosgenin glucoside                | VialCode: ZC03610532<br>Cat. No.: HY-112802<br>AZD3229                      | VialCode: ZC03610572<br>Cat. No.: HY-18302<br>c-Kit-IN-5-1                | VialCode: ZC03610548<br>Cat. No.: HY-156467A<br>Neladalkib (TFA) | VialCode: ZC03610564<br>Cat. No.: HY-149766<br>PB94                               | VialCode: ZC03610556<br>Cat. No.: HY-16956<br>Onatasertib               | VialCode: ZC03610580<br>Cat. No.: HY-144636<br>Atg4B-IN-2                   | Empty<br>E12 |
| F | Empty<br>F1 | VialCode: ZC03610595<br>Cat. No.: HY-148234<br>M4K2234                        | VialCode: ZC03610587<br>Cat. No.: HY-N0712<br>Typhaneoside                 | VialCode: ZC03610547<br>Cat. No.: HY-147768<br>PI3K/AKT-IN-2                    | VialCode: ZC03610539<br>Cat. No.: HY-15837<br>SAR-260301                         | VialCode: ZC03610531<br>Cat. No.: HY-114199<br>Eph inhibitor 1              | VialCode: ZC03610571<br>Cat. No.: HY-125858A<br>ML-1061 (TFA)             | VialCode: ZC03610563<br>Cat. No.: HY-148742<br>RET-IN-21         | VialCode: ZC03610555<br>Cat. No.: HY-12445<br>Asnuciclib                          | VialCode: ZC03610524<br>Cat. No.: HY-117366<br>PS432                    | VialCode: ZC03610516<br>Cat. No.: HY-149824<br>EGFR<br>T790M/L858R-IN-<br>2 | Empty<br>F12 |
| G | Empty<br>G1 | VialCode: ZC03610594<br>Cat. No.: HY-114153A<br>PLX5622<br>(hemifumarat<br>e) | VialCode: ZC03610586<br>Cat. No.: HY-103022<br>Repotrectinib               | VialCode: ZC03610579<br>Cat. No.: HY-101957<br>AG 1295                          | VialCode: ZC03610578<br>Cat. No.: HY-103224<br>PIT-1                             | VialCode: ZC03610523<br>Cat. No.: HY-124097<br>HNMPA-(AM)3                  | VialCode: ZC03610515<br>Cat. No.: HY-13223<br>Crenolanib                  | VialCode: ZC03610507<br>Cat. No.: HY-18082<br>AGI-5198           | VialCode: ZC03610570<br>Cat. No.: HY-124295<br>MPT0E028                           | VialCode: ZC03610562<br>Cat. No.: HY-156135<br>NSC194598                | VialCode: ZC03610554<br>Cat. No.: HY-10421<br>Tyrosine kinase inhi<br>bitor | Empty<br>G12 |
| H | Empty<br>H1 | VialCode: ZC03610593<br>Cat. No.: HY-10962<br>Mometotinib (sulfate<br>)       | VialCode: ZC03610585<br>Cat. No.: HY-18309<br>MET kinase-IN-4              | VialCode: ZC03610577<br>Cat. No.: HY-101007A<br>(+)-Tyrphostin B44              | VialCode: ZC03610546<br>Cat. No.: HY-112451<br>cFMS Receptor<br>Inhibi<br>tor II | VialCode: ZC03610538<br>Cat. No.: HY-14660A<br>Dabrafenib<br>(Mesylate<br>) | VialCode: ZC03610530<br>Cat. No.: HY-138831<br>AES-350                    | VialCode: ZC03610569<br>Cat. No.: HY-13038A<br>Fostamatinib      | VialCode: ZC03610522<br>Cat. No.: HY-164756<br>PKCTheta-IN-2                      | VialCode: ZC03610514<br>Cat. No.: HY-N4126<br>6-Demethoxytangereti<br>n | VialCode: ZC03610506<br>Cat. No.: HY-13806<br>XL388                         | Empty<br>H12 |

# 13

Compound Library Layout: Rack FK00234573 (DMSO Solution, 10 mM, 80 Compounds)



|   | 1           | 2                                                                              | 3                                                                                 | 4                                                             | 5                                                                                      | 6                                                                          | 7                                                              | 8                                                                | 9                                                                           | 10                                                                       | 11                                                                | 12           |
|---|-------------|--------------------------------------------------------------------------------|-----------------------------------------------------------------------------------|---------------------------------------------------------------|----------------------------------------------------------------------------------------|----------------------------------------------------------------------------|----------------------------------------------------------------|------------------------------------------------------------------|-----------------------------------------------------------------------------|--------------------------------------------------------------------------|-------------------------------------------------------------------|--------------|
| A | Empty<br>A1 | VialCode: ZC03518369<br>Cat. No.: HY-18625A<br>VEGFR-2-IN-5<br>(hydrochloride) | VialCode: ZC03518377<br>Cat. No.: HY-19990<br>ALK kinase inhibitor<br>-1          | VialCode: ZC03518345<br>Cat. No.: HY-117273<br>AZ304          | VialCode: ZC03518353<br>Cat. No.: HY-16012A<br>Domatinostat                            | VialCode: ZC03518361<br>Cat. No.: HY-129634<br>TrkA-IN-1                   | VialCode: ZC03518385<br>Cat. No.: HY-123578<br>NSC689857       | VialCode: ZC03518393<br>Cat. No.: HY-12497<br>ANA-12             | VialCode: ZC03518401<br>Cat. No.: HY-12046<br>PIK-93                        | VialCode: ZC03518418<br>Cat. No.: HY-12054<br>Hesperadin                 | VialCode: ZC03518426<br>Cat. No.: HY-14393<br>Emodin              | Empty<br>A12 |
| B | Empty<br>B1 | VialCode: ZC03518410<br>Cat. No.: HY-13311<br>Infigratinib                     | VialCode: ZC03518338<br>Cat. No.: HY-122246<br>ML192                              | VialCode: ZC03518346<br>Cat. No.: HY-107620<br>PD 198306      | VialCode: ZC03518354<br>Cat. No.: HY-120508<br>Pivanex                                 | VialCode: ZC03518362<br>Cat. No.: HY-P3695<br>VSPPLTLGQLLS                 | VialCode: ZC03518394<br>Cat. No.: HY-N0060<br>Ferulic acid     | VialCode: ZC03518402<br>Cat. No.: HY-151949<br>TrkA-IN-4         | VialCode: ZC03518386<br>Cat. No.: HY-13423<br>Tenovin-1                     | VialCode: ZC03518370<br>Cat. No.: HY-112437<br>PF-06737007               | VialCode: ZC03518378<br>Cat. No.: HY-112698<br>CA-5f              | Empty<br>B12 |
| C | Empty<br>C1 | VialCode: ZC03518339<br>Cat. No.: HY-15992<br>BIBF 1202                        | VialCode: ZC03518347<br>Cat. No.: HY-135436<br>AG 538                             | VialCode: ZC03518355<br>Cat. No.: HY-148833<br>MDM2-p53-IN-16 | VialCode: ZC03518363<br>Cat. No.: HY-103441<br>JNJ28871063<br>(hydrochloride)          | VialCode: ZC03518371<br>Cat. No.: HY-162148<br>HNPMI                       | VialCode: ZC03518379<br>Cat. No.: HY-10303<br>PIK-294          | VialCode: ZC03518403<br>Cat. No.: HY-17437<br>Mefloquine         | VialCode: ZC03518411<br>Cat. No.: HY-101960A<br>Tyrphostin A51              | VialCode: ZC03518419<br>Cat. No.: HY-15244<br>Alpelisib                  | VialCode: ZC03518427<br>Cat. No.: HY-W174279<br>Tyrphostin 8      | Empty<br>C12 |
| D | Empty<br>D1 | VialCode: ZC03518340<br>Cat. No.: HY-111621<br>DC661                           | VialCode: ZC03518348<br>Cat. No.: HY-149636<br>Multi-target kinase<br>inhibitor 2 | VialCode: ZC03518356<br>Cat. No.: HY-18787<br>c-Fms-IN-2      | VialCode: ZC03518372<br>Cat. No.: HY-12420<br>JNJ-47117096<br>hydrochloride            | VialCode: ZC03518380<br>Cat. No.: HY-13905<br>Flumatinib (mesylate<br>)    | VialCode: ZC03518420<br>Cat. No.: HY-112289<br>IDH889          | VialCode: ZC03518364<br>Cat. No.: HY-103274<br>PD180970          | VialCode: ZC03518428<br>Cat. No.: HY-118783<br>2-Hexyl-4-pentynoic<br>acid  | VialCode: ZC03518387<br>Cat. No.: HY-117348<br>NCC-149                   | VialCode: ZC03518395<br>Cat. No.: HY-147054<br>WEE1-IN-5          | Empty<br>D12 |
| E | Empty<br>E1 | VialCode: ZC03518334<br>Cat. No.: HY-107419<br>NU6140                          | VialCode: ZC03518342<br>Cat. No.: HY-108931<br>AG 1406                            | VialCode: ZC03518350<br>Cat. No.: HY-112818<br>S130           | VialCode: ZC03518358<br>Cat. No.: HY-13038B<br>Fostamatinib (disodi<br>um hexahydrate) | VialCode: ZC03518366<br>Cat. No.: HY-120640<br>BMS-605541                  | VialCode: ZC03518374<br>Cat. No.: HY-15844<br>AG-825           | VialCode: ZC03518382<br>Cat. No.: HY-135401<br>VU6015929         | VialCode: ZC03518406<br>Cat. No.: HY-124813<br>PDZ1i                        | VialCode: ZC03518414<br>Cat. No.: HY-116794<br>SF5                       | VialCode: ZC03518422<br>Cat. No.: HY-101426<br>RG14620            | Empty<br>E12 |
| F | Empty<br>F1 | VialCode: ZC03518351<br>Cat. No.: HY-15375<br>Allitinib                        | VialCode: ZC03518335<br>Cat. No.: HY-13308<br>Regorafenib<br>(Hydrochloride)      | VialCode: ZC03518359<br>Cat. No.: HY-123058<br>Vps34-IN-4     | VialCode: ZC03518367<br>Cat. No.: HY-10261A<br>Afatinib (dimalteate)                   | VialCode: ZC03518375<br>Cat. No.: HY-15467A<br>ZM323881<br>(hydrochloride) | VialCode: ZC03518383<br>Cat. No.: HY-109574<br>Raf inhibitor 2 | VialCode: ZC03518391<br>Cat. No.: HY-10203<br>Vatalanib          | VialCode: ZC03518390<br>Cat. No.: HY-17507A<br>Pantoprazole<br>(sodium<br>) | VialCode: ZC03518343<br>Cat. No.: HY-117651<br>2-Fluoropalmitic aci<br>d | VialCode: ZC03518398<br>Cat. No.: HY-101961<br>Tyrphostin AG 1288 | Empty<br>F12 |
| G | Empty<br>G1 | VialCode: ZC03518336<br>Cat. No.: HY-136477<br>Pentagamavunon-1                | VialCode: ZC03518344<br>Cat. No.: HY-101443<br>ISCK03                             | VialCode: ZC03518416<br>Cat. No.: HY-N2515<br>Ginsenoside Rk1 | VialCode: ZC03518424<br>Cat. No.: HY-W800162<br>VEGFR-2-IN-37                          | VialCode: ZC03518408<br>Cat. No.: HY-107460<br>LDN-211904<br>(oxalate)     | VialCode: ZC03518407<br>Cat. No.: HY-10331<br>Regorafenib      | VialCode: ZC03518352<br>Cat. No.: HY-12452<br>DPN                | VialCode: ZC03518415<br>Cat. No.: HY-B1490A<br>Imipramine                   | VialCode: ZC03518423<br>Cat. No.: HY-12047<br>Ponatinib                  | VialCode: ZC03518399<br>Cat. No.: HY-100419<br>BFH772             | Empty<br>G12 |
| H | Empty<br>H1 | VialCode: ZC03518360<br>Cat. No.: HY-Y0121<br>Ethyl cinnamate                  | VialCode: ZC03518368<br>Cat. No.: HY-107362<br>CH7057288                          | VialCode: ZC03518376<br>Cat. No.: HY-133670<br>DDR1-IN-6      | VialCode: ZC03518392<br>Cat. No.: HY-N0183<br>Formononetin                             | VialCode: ZC03518400<br>Cat. No.: HY-103045<br>CMPD101                     | VialCode: ZC03518337<br>Cat. No.: HY-15358<br>ALK inhibitor 2  | VialCode: ZC03518384<br>Cat. No.: HY-112802A<br>AZD3229 Tosylate | VialCode: ZC03518409<br>Cat. No.: HY-100222<br>CZ415                        | VialCode: ZC03518417<br>Cat. No.: HY-10209<br>Masitinib                  | VialCode: ZC03518425<br>Cat. No.: HY-111553<br>TAS0728            | Empty<br>H12 |

# 14

Compound Library Layout: Rack FK00086007 (DMSO Solution, 10 mM, 80 Compounds)



|   | 1           | 2                                                                              | 3                                                                                  | 4                                                                                | 5                                                                                        | 6                                                                                     | 7                                                                                                                  | 8                                                                                     | 9                                                                     | 10                                                                                       | 11                                                                                              | 12           |
|---|-------------|--------------------------------------------------------------------------------|------------------------------------------------------------------------------------|----------------------------------------------------------------------------------|------------------------------------------------------------------------------------------|---------------------------------------------------------------------------------------|--------------------------------------------------------------------------------------------------------------------|---------------------------------------------------------------------------------------|-----------------------------------------------------------------------|------------------------------------------------------------------------------------------|-------------------------------------------------------------------------------------------------|--------------|
| A | Empty<br>A1 | VialCode: ZC03596941<br>Cat. No.: HY-110171A<br>iMDK<br>(quarterhydrate)<br>A2 | VialCode: ZC03596981<br>Cat. No.: HY-114370<br>Selpercatinib<br>A3                 | VialCode: ZC03596957<br>Cat. No.: HY-126147<br>J22352<br>A4                      | VialCode: ZC03596949<br>Cat. No.: HY-10527C<br>Telatinib (mesylate)<br>A5                | VialCode: ZC03596933<br>Cat. No.: HY-146751<br>PI3K/Akt/mTOR-IN-2<br>A6               | VialCode: ZC03596909<br>Cat. No.: HY-131706A<br>GNF-8625<br>monopyridin<br>-N-piperazine (hydro<br>chloride)<br>A7 | VialCode: ZC03596901<br>Cat. No.: HY-100596<br>AS1842856<br>A8                        | VialCode: ZC03596893<br>Cat. No.: HY-110026<br>GTP-14564<br>A9        | VialCode: ZC03596973<br>Cat. No.: HY-N2217<br>Rotundic acid<br>A10                       | VialCode: ZC03596965<br>Cat. No.: HY-W143698<br>PDGFR $\alpha$ kinase<br>inhibi<br>tor 2<br>A11 | Empty<br>A12 |
| B | Empty<br>B1 | VialCode: ZC03596932<br>Cat. No.: HY-131066<br>EM148<br>B2                     | VialCode: ZC03596924<br>Cat. No.: HY-122113<br>PD173952<br>B3                      | VialCode: ZC03596956<br>Cat. No.: HY-131065<br>MET kinase-IN-2<br>B4             | VialCode: ZC03596948<br>Cat. No.: HY-15735<br>c-Met inhibitor 1<br>B5                    | VialCode: ZC03596940<br>Cat. No.: HY-15247<br>Vistusertib<br>B6                       | VialCode: ZC03596980<br>Cat. No.: HY-135887<br>ZX-29<br>B7                                                         | VialCode: ZC03596972<br>Cat. No.: HY-100865<br>BPR1K871<br>B8                         | VialCode: ZC03596964<br>Cat. No.: HY-10531<br>ARRY-380 (analog)<br>B9 | VialCode: ZC03596925<br>Cat. No.: HY-N0103A<br>Sophocarpine<br>(monohy<br>drate)<br>B10  | VialCode: ZC03596917<br>Cat. No.: HY-10195<br>Ruboxistaurin<br>B11                              | Empty<br>B12 |
| C | Empty<br>C1 | VialCode: ZC03596955<br>Cat. No.: HY-122582<br>TL13-12<br>C2                   | VialCode: ZC03596947<br>Cat. No.: HY-10940<br>Pifithrin- $\mu$<br>C3               | VialCode: ZC03596939<br>Cat. No.: HY-14842<br>Givinostat<br>C4                   | VialCode: ZC03596979<br>Cat. No.: HY-U00002<br>ZD-4190<br>C5                             | VialCode: ZC03596971<br>Cat. No.: HY-10174<br>PD184161<br>C6                          | VialCode: ZC03596963<br>Cat. No.: HY-12868<br>Bimiralisib<br>C7                                                    | VialCode: ZC03596916<br>Cat. No.: HY-17044<br>Duvelisib<br>C8                         | VialCode: ZC03596908<br>Cat. No.: HY-10012<br>AZD-5438<br>C9          | VialCode: ZC03596900<br>Cat. No.: HY-131347<br>PD-1/PD-L1-IN-NP19<br>C10                 | VialCode: ZC03596892<br>Cat. No.: HY-N2666<br>5 $\alpha$ -Hydroxycostic aci<br>d<br>C11         | Empty<br>C12 |
| D | Empty<br>D1 | VialCode: ZC03596962<br>Cat. No.: HY-100694<br>GS-9901<br>D2                   | VialCode: ZC03596890<br>Cat. No.: HY-143466<br>ULK1-IN-2<br>D3                     | VialCode: ZC03596978<br>Cat. No.: HY-18785<br>Indirubin Derivative<br>E804<br>D4 | VialCode: ZC03596970<br>Cat. No.: HY-Y0038<br>2-Bromo-6-methoxyne<br>thalene<br>D5       | VialCode: ZC03596931<br>Cat. No.: HY-103464<br>5'-Fluoroindirubinox<br>ime<br>D6      | VialCode: ZC03596923<br>Cat. No.: HY-11042<br>GNE-477<br>D7                                                        | VialCode: ZC03596915<br>Cat. No.: HY-137506<br>XST-14<br>D8                           | VialCode: ZC03596907<br>Cat. No.: HY-21289<br>SU5205<br>D9            | VialCode: ZC03596899<br>Cat. No.: HY-100923<br>H-9 (Dihydrochloride<br>)<br>D10          | VialCode: ZC03596891<br>Cat. No.: HY-13531<br>AS-604850<br>D11                                  | Empty<br>D12 |
| E | Empty<br>E1 | VialCode: ZC03518349<br>Cat. No.: HY-15415<br>KB-R7943<br>(mesylate)<br>E2     | VialCode: ZC03518365<br>Cat. No.: HY-100214<br>EAI001<br>E3                        | VialCode: ZC03518421<br>Cat. No.: HY-112436<br>PF-6683324<br>E4                  | VialCode: ZC03518357<br>Cat. No.: HY-136068<br>DCAP<br>E5                                | VialCode: ZC03518341<br>Cat. No.: HY-18926<br>VEGFR2-IN-7<br>E6                       | VialCode: ZC03518429<br>Cat. No.: HY-103440<br>EGFR/ErbB-2/ErbB-4<br>i<br>nhibitor-3<br>E7                         | VialCode: ZC03518404<br>Cat. No.: HY-122616<br>PF-06273340<br>E8                      | VialCode: ZC03518412<br>Cat. No.: HY-18972<br>Plixorafenib<br>E9      | VialCode: ZC03518388<br>Cat. No.: HY-148228<br>ROS kinases-IN-1<br>E10                   | VialCode: ZC03518396<br>Cat. No.: HY-128571<br>FLT3-IN-4<br>E11                                 | Empty<br>E12 |
| F | Empty<br>F1 | VialCode: ZC03518413<br>Cat. No.: HY-114357A<br>DS-1205b (free<br>base)<br>F2  | VialCode: ZC03596895<br>Cat. No.: HY-15749<br>XL228<br>F3                          | VialCode: ZC03596975<br>Cat. No.: HY-15456<br>NVP-BVU972<br>F4                   | VialCode: ZC03596967<br>Cat. No.: HY-12787<br>L-779450<br>F5                             | VialCode: ZC03518373<br>Cat. No.: HY-113974<br>trans-AUCB<br>F6                       | VialCode: ZC03518381<br>Cat. No.: HY-N0047<br>Polyphyllin I<br>F7                                                  | VialCode: ZC03518389<br>Cat. No.: HY-15339<br>CVT-313<br>F8                           | VialCode: ZC03518397<br>Cat. No.: HY-13737<br>R1530<br>F9             | VialCode: ZC03518405<br>Cat. No.: HY-101195<br>DL-erythro-Dihydrosop<br>hingosine<br>F10 | VialCode: ZC03596983<br>Cat. No.: HY-15240<br>c-Kit-IN-1<br>F11                                 | Empty<br>F12 |
| G | Empty<br>G1 | VialCode: ZC03596982<br>Cat. No.: HY-115475<br>SW-100<br>G2                    | VialCode: ZC03596974<br>Cat. No.: HY-122704A<br>Surfen (dihydrochlor<br>ide)<br>G3 | VialCode: ZC03596919<br>Cat. No.: HY-12330<br>AZD8186<br>G4                      | VialCode: ZC03596911<br>Cat. No.: HY-153110<br>Larotinib<br>G5                           | VialCode: ZC03596935<br>Cat. No.: HY-N5072<br>Desmethylglycitein<br>G6                | VialCode: ZC03596927<br>Cat. No.: HY-50847<br>ZSTK474<br>G7                                                        | VialCode: ZC03596959<br>Cat. No.: HY-112294<br>TIE-2/VEGFR-2<br>kinase<br>-IN-1<br>G8 | VialCode: ZC03596951<br>Cat. No.: HY-121222<br>alpha-Bisabolol<br>G9  | VialCode: ZC03596943<br>Cat. No.: HY-100624<br>Ryuvidine<br>G10                          | VialCode: ZC03596903<br>Cat. No.: HY-151948<br>TrkA-IN-3<br>G11                                 | Empty<br>G12 |
| H | Empty<br>H1 | VialCode: ZC03596918<br>Cat. No.: HY-144677<br>pan-HER-IN-2<br>H2              | VialCode: ZC03596910<br>Cat. No.: HY-103647<br>K00546<br>H3                        | VialCode: ZC03596902<br>Cat. No.: HY-W015309<br>Decanoic acid<br>H4              | VialCode: ZC03596894<br>Cat. No.: HY-132150A<br>HPK1-IN-2<br>(dihydroch<br>loride)<br>H5 | VialCode: ZC03596942<br>Cat. No.: HY-13079<br>Cobimetinib<br>(R-enant<br>iomer)<br>H6 | VialCode: ZC03596934<br>Cat. No.: HY-107194<br>NSC12<br>H7                                                         | VialCode: ZC03596950<br>Cat. No.: HY-12331<br>KRCA-0008<br>H8                         | VialCode: ZC03596926<br>Cat. No.: HY-10202<br>Tandutinib<br>H9        | VialCode: ZC03596966<br>Cat. No.: HY-10208<br>Pazopanib<br>H10                           | VialCode: ZC03596958<br>Cat. No.: HY-110293<br>CHMFL-FLT3-122<br>H11                            | Empty<br>H12 |

# 15

Compound Library Layout: Rack FK00234521 (DMSO Solution, 10 mM, 80 Compounds)



|   | 1           | 2                                                                            | 3                                                             | 4                                                                                    | 5                                                                                   | 6                                                                  | 7                                                                           | 8                                                           | 9                                                                                | 10                                                                                         | 11                                                                                | 12           |
|---|-------------|------------------------------------------------------------------------------|---------------------------------------------------------------|--------------------------------------------------------------------------------------|-------------------------------------------------------------------------------------|--------------------------------------------------------------------|-----------------------------------------------------------------------------|-------------------------------------------------------------|----------------------------------------------------------------------------------|--------------------------------------------------------------------------------------------|-----------------------------------------------------------------------------------|--------------|
| A | Empty<br>A1 | VialCode: ZC03577904<br>Cat. No.: HY-W018800<br>4(3H)-Quinazolinone          | VialCode: ZC03577912<br>Cat. No.: HY-N0847<br>Micheliolide    | VialCode: ZC03577920<br>Cat. No.: HY-50295<br>CI-1040                                | VialCode: ZC03577960<br>Cat. No.: HY-13464<br>ALK-IN-1                              | VialCode: ZC03577968<br>Cat. No.: HY-10322<br>Falinidamol          | VialCode: ZC03577976<br>Cat. No.: HY-13311A<br>Infigratinib phosphate       | VialCode: ZC03577986<br>Cat. No.: HY-16712<br>LDN-214117    | VialCode: ZC03577984<br>Cat. No.: HY-N2484<br>Methylnisolin                      | VialCode: ZC03596920<br>Cat. No.: HY-101977<br>Selitrectinib                               | VialCode: ZC03596928<br>Cat. No.: HY-108052<br>Delphinidin 3-glucoside (chloride) | Empty<br>A12 |
| B | Empty<br>B1 | VialCode: ZC03596888<br>Cat. No.: HY-151904<br>AXL-IN-13                     | VialCode: ZC03596896<br>Cat. No.: HY-N0247<br>Saikosaponin B1 | VialCode: ZC03596904<br>Cat. No.: HY-124582<br>NEO214                                | VialCode: ZC03596912<br>Cat. No.: HY-148181<br>c-Fms-IN-13                          | VialCode: ZC03596936<br>Cat. No.: HY-150610<br>EGFR-IN-69          | VialCode: ZC03596944<br>Cat. No.: HY-15458A<br>(S)-SAR131675                | VialCode: ZC03596952<br>Cat. No.: HY-144779<br>HDAC10-IN-1  | VialCode: ZC03596960<br>Cat. No.: HY-112145<br>FLT3-IN-3                         | VialCode: ZC03596968<br>Cat. No.: HY-13440<br>AMG 511                                      | VialCode: ZC03596976<br>Cat. No.: HY-16749<br>Pexidartinib                        | Empty<br>B12 |
| C | Empty<br>C1 | VialCode: ZC03596889<br>Cat. No.: HY-112681<br>PKC-theta inhibitor 2         | VialCode: ZC03596897<br>Cat. No.: HY-12338<br>ON 146040       | VialCode: ZC03596905<br>Cat. No.: HY-163199<br>ASCT2-IN-2                            | VialCode: ZC03596945<br>Cat. No.: HY-111207<br>CA224                                | VialCode: ZC03596953<br>Cat. No.: HY-15196<br>TAK-285              | VialCode: ZC03596961<br>Cat. No.: HY-W050000<br>OR-1855                     | VialCode: ZC03596921<br>Cat. No.: HY-P0018<br>Pepstatin     | VialCode: ZC03596929<br>Cat. No.: HY-17645<br>Tenalisib                          | VialCode: ZC03596937<br>Cat. No.: HY-126534A<br>Abemaciclib metabolite M18 (hydrochloride) | VialCode: ZC03596913<br>Cat. No.: HY-19991<br>BMS-1                               | Empty<br>C12 |
| D | Empty<br>D1 | VialCode: ZC03596888<br>Cat. No.: HY-N0281<br>Daphnetin                      | VialCode: ZC03596906<br>Cat. No.: HY-18998<br>LMK-235         | VialCode: ZC03596914<br>Cat. No.: HY-148040<br>VEGFR-2-IN-29                         | VialCode: ZC03596930<br>Cat. No.: HY-13326<br>ASP3026                               | VialCode: ZC03596969<br>Cat. No.: HY-50898<br>Lapatinib            | VialCode: ZC03596977<br>Cat. No.: HY-144782A<br>HDAC10-IN-2 (hydrochloride) | VialCode: ZC03596922<br>Cat. No.: HY-138239<br>WEE1-IN-3    | VialCode: ZC03596938<br>Cat. No.: HY-17362<br>Vancomycin (hydrochloride)         | VialCode: ZC03596946<br>Cat. No.: HY-18952A<br>(Z)-SU5614                                  | VialCode: ZC03596954<br>Cat. No.: HY-13864<br>PF-4989216                          | Empty<br>D12 |
| E | Empty<br>E1 | VialCode: ZC03577893<br>Cat. No.: HY-139990<br>CSF1R-IN-3                    | VialCode: ZC03577901<br>Cat. No.: HY-13838<br>PLX647          | VialCode: ZC03577909<br>Cat. No.: HY-N2187<br>Deoxyshikonin                          | VialCode: ZC03577949<br>Cat. No.: HY-50751<br>Linifanib                             | VialCode: ZC03577957<br>Cat. No.: HY-118672<br>HNHA                | VialCode: ZC03577965<br>Cat. No.: HY-155747<br>FDW028                       | VialCode: ZC03577917<br>Cat. No.: HY-118384<br>Sangivamycin | VialCode: ZC03577925<br>Cat. No.: HY-N0076<br>Bilobalide                         | VialCode: ZC03577933<br>Cat. No.: HY-11001<br>PHA-793887                                   | VialCode: ZC03577941<br>Cat. No.: HY-P2096<br>Hexapeptide-11                      | Empty<br>E12 |
| F | Empty<br>F1 | VialCode: ZC03577894<br>Cat. No.: HY-13677<br>6-Mercaptopurine               | VialCode: ZC03577902<br>Cat. No.: HY-16025<br>EOC317          | VialCode: ZC03577910<br>Cat. No.: HY-13867A<br>Bisindolylmaleimide I (hydrochloride) | VialCode: ZC03577926<br>Cat. No.: HY-P5881<br>PKC $\alpha$ (C2-4) inhibitor peptide | VialCode: ZC03577934<br>Cat. No.: HY-13896<br>PD168393             | VialCode: ZC03577981<br>Cat. No.: HY-18700<br>BRD73954                      | VialCode: ZC03577942<br>Cat. No.: HY-15521<br>ETP-46464     | VialCode: ZC03577958<br>Cat. No.: HY-N6775<br>Sonolisib                          | VialCode: ZC03577918<br>Cat. No.: HY-117737A<br>RRD-251                                    | VialCode: ZC03577973<br>Cat. No.: HY-16012<br>Domatinostat (tosylate)             | Empty<br>F12 |
| G | Empty<br>G1 | VialCode: ZC03577895<br>Cat. No.: HY-18507<br>AD57                           | VialCode: ZC03577903<br>Cat. No.: HY-153603<br>B-Raf IN 15    | VialCode: ZC03577911<br>Cat. No.: HY-15656<br>Ceritinib                              | VialCode: ZC03577919<br>Cat. No.: HY-19909<br>NRC-2694                              | VialCode: ZC03577927<br>Cat. No.: HY-10336<br>Brivanib (alaninate) | VialCode: ZC03577935<br>Cat. No.: HY-10320<br>Doramapimod                   | VialCode: ZC03577966<br>Cat. No.: HY-117596<br>UNC569       | VialCode: ZC03577974<br>Cat. No.: HY-134990<br>Hematoporphyrin mono methyl ether | VialCode: ZC03577982<br>Cat. No.: HY-10864<br>URB-597                                      | VialCode: ZC03577950<br>Cat. No.: HY-N0931<br>Santacruzamate A                    | Empty<br>G12 |
| H | Empty<br>H1 | VialCode: ZC03577943<br>Cat. No.: HY-W012722<br>4-Methyl-2-oxopentanoic acid | VialCode: ZC03577928<br>Cat. No.: HY-124053<br>BRD2492        | VialCode: ZC03577951<br>Cat. No.: HY-115452<br>G5-7                                  | VialCode: ZC03577959<br>Cat. No.: HY-16141<br>Cilengitide                           | VialCode: ZC03577967<br>Cat. No.: HY-12644<br>Acalisib             | VialCode: ZC03577975<br>Cat. No.: HY-148279<br>c-Met-IN-15                  | VialCode: ZC03577983<br>Cat. No.: HY-15141<br>Staurosporine | VialCode: ZC03577936<br>Cat. No.: HY-18712<br>BG45                               | VialCode: ZC03577944<br>Cat. No.: HY-100315<br>XL 999                                      | VialCode: ZC03577952<br>Cat. No.: HY-10372<br>PP121                               | Empty<br>H12 |

# 16

Compound Library Layout: Rack FK00238024 (DMSO Solution, 10 mM, 80 Compounds)



|   | 1           | 2                                                                                         | 3                                                                             | 4                                                                          | 5                                                                                                      | 6                                                                                    | 7                                                                                        | 8                                                                                  | 9                                                                              | 10                                                                           | 11                                                                                | 12           |
|---|-------------|-------------------------------------------------------------------------------------------|-------------------------------------------------------------------------------|----------------------------------------------------------------------------|--------------------------------------------------------------------------------------------------------|--------------------------------------------------------------------------------------|------------------------------------------------------------------------------------------|------------------------------------------------------------------------------------|--------------------------------------------------------------------------------|------------------------------------------------------------------------------|-----------------------------------------------------------------------------------|--------------|
| A | Empty<br>A1 | VialCode: ZC03577898<br>Cat. No. : HY-160124<br>Infigratinib-Boc                          | VialCode: ZC03577906<br>Cat. No. : HY-147218<br>PF-07265807                   | VialCode: ZC03577914<br>Cat. No. : HY-112089<br>Naporafenib                | VialCode: ZC03577922<br>Cat. No. : HY-108600<br>CGP-53353                                              | VialCode: ZC03577930<br>Cat. No. : HY-144806<br>PI3K/AKT-IN-1                        | VialCode: ZC03577969<br>Cat. No. : HY-161305<br>SE-7552                                  | VialCode: ZC03577977<br>Cat. No. : HY-14691<br>Refametinib                         | VialCode: ZC03577953<br>Cat. No. : HY-U00444<br>7rh                            | VialCode: ZC03577961<br>Cat. No. : HY-14581<br>Palomid 529                   | VialCode: ZC03577890<br>Cat. No. : HY-N3001<br>Isolinderalactone                  | Empty<br>A12 |
| B | Empty<br>B1 | VialCode: ZC03577899<br>Cat. No. : HY-18997<br>PLX7904                                    | VialCode: ZC03577907<br>Cat. No. : HY-10402<br>Losmapimod                     | VialCode: ZC03577915<br>Cat. No. : HY-109015<br>Tucidinostat               | VialCode: ZC03577962<br>Cat. No. : HY-B1387<br>Sulfamethoxyipyridazi<br>ne                             | VialCode: ZC03577970<br>Cat. No. : HY-143404<br>PI3K-IN-30                           | VialCode: ZC03577978<br>Cat. No. : HY-162006<br>Pim-1 kinase inhibit<br>or 8             | VialCode: ZC03577938<br>Cat. No. : HY-12344<br>UNC2025                             | VialCode: ZC03577946<br>Cat. No. : HY-10261<br>Afatinib                        | VialCode: ZC03577954<br>Cat. No. : HY-156603<br>Canlitinib                   | VialCode: ZC03577923<br>Cat. No. : HY-103714A<br>Ersartanib (dihydroc<br>hloride) | Empty<br>B12 |
| C | Empty<br>C1 | VialCode: ZC03577979<br>Cat. No. : HY-139781<br>PD-L1-IN-1                                | VialCode: ZC03577916<br>Cat. No. : HY-N0728<br>$\alpha$ -Linolenic acid       | VialCode: ZC03577924<br>Cat. No. : HY-162382<br>KTC1101                    | VialCode: ZC03577891<br>Cat. No. : HY-153064<br>MAX-10181                                              | VialCode: ZC03577939<br>Cat. No. : HY-134807<br>Indophagolin                         | VialCode: ZC03577947<br>Cat. No. : HY-10961<br>Momelotinib                               | VialCode: ZC03577955<br>Cat. No. : HY-145757<br>Elevenostat                        | VialCode: ZC03577931<br>Cat. No. : HY-10205<br>Cediranib                       | VialCode: ZC03577963<br>Cat. No. : HY-18303<br>AMG-47a                       | VialCode: ZC03577971<br>Cat. No. : HY-156966<br>ATG12-ATG3<br>inhibitor<br>1      | Empty<br>C12 |
| D | Empty<br>D1 | VialCode: ZC03577980<br>Cat. No. : HY-13749<br>Sitagliptin                                | VialCode: ZC03577892<br>Cat. No. : HY-134481<br>FLT3-IN-10                    | VialCode: ZC03577900<br>Cat. No. : HY-N0392<br>Polygalasaponin F           | VialCode: ZC03577908<br>Cat. No. : HY-123295<br>HDAC3-IN-T247                                          | VialCode: ZC03577932<br>Cat. No. : HY-102066<br>Utaretrectinib                       | VialCode: ZC03577940<br>Cat. No. : HY-N0060A<br>Ferulic acid (sodium<br>)                | VialCode: ZC03577948<br>Cat. No. : HY-155736<br>MAPK-IN-2                          | VialCode: ZC03577956<br>Cat. No. : HY-12279C<br>Umbralisib (hydrochl<br>oride) | VialCode: ZC03577964<br>Cat. No. : HY-10195A<br>Ruboxistaurin (mesyl<br>ate) | VialCode: ZC03577972<br>Cat. No. : HY-10999<br>Trametinib                         | Empty<br>D12 |
| E | Empty<br>E1 | VialCode: ZC03483468<br>Cat. No. : HY-125957<br>A-3 (hydrochloride)                       | VialCode: ZC03583143<br>Cat. No. : HY-12057<br>Vemurafenib                    | VialCode: ZC03483476<br>Cat. No. : HY-100678<br>CGS 15943                  | VialCode: ZC03483475<br>Cat. No. : HY-100983<br>Protein kinase inhib<br>itor H-7 (dihydrochl<br>oride) | VialCode: ZC03483467<br>Cat. No. : HY-111138<br>CZC-8004                             | VialCode: ZC03483465<br>Cat. No. : HY-13502A<br>Mitoxantrone (dihydr<br>ochloride)       | VialCode: ZC03483456<br>Cat. No. : HY-100627<br>APS-2-79                           | VialCode: ZC03483479<br>Cat. No. : HY-104066<br>Theliatinib                    | VialCode: ZC03483439<br>Cat. No. : HY-12026<br>WZ4002                        | VialCode: ZC03583140<br>Cat. No. : HY-145574<br>Iruplinalkib                      | Empty<br>E12 |
| F | Empty<br>F1 | VialCode: ZC03483485<br>Cat. No. : HY-19747<br>HPOB                                       | VialCode: ZC03483483<br>Cat. No. : HY-138799<br>KA2507                        | VialCode: ZC03483448<br>Cat. No. : HY-N0567<br>Hydroxysafflor yello<br>w A | VialCode: ZC03483464<br>Cat. No. : HY-18696<br>AMG-337                                                 | VialCode: ZC03483440<br>Cat. No. : HY-100492<br>Fisogatinib                          | VialCode: ZC03483469<br>Cat. No. : HY-15569<br>NU6102                                    | VialCode: ZC03483484<br>Cat. No. : HY-111342<br>HDAC8-IN-1                         | VialCode: ZC03483482<br>Cat. No. : HY-132842<br>Sunvozertinib                  | VialCode: ZC03483466<br>Cat. No. : HY-118304B<br>AKN-028 (acetate)           | VialCode: ZC03468154<br>Cat. No. : HY-10497<br>BMS-794833                         | Empty<br>F12 |
| G | Empty<br>G1 | VialCode: ZC03483480<br>Cat. No. : HY-15002<br>AST 487                                    | VialCode: ZC03483449<br>Cat. No. : HY-12058<br>AZD8330                        | VialCode: ZC03583131<br>Cat. No. : HY-10192<br>NVP-TAE 684                 | VialCode: ZC03583129<br>Cat. No. : HY-10185<br>TG 100572<br>(Hydrochlori<br>de)                        | VialCode: ZC03583152<br>Cat. No. : HY-W009776<br>Suberoyl<br>bis-hydroxa<br>mic acid | VialCode: ZC03583153<br>Cat. No. : HY-12067<br>R406                                      | VialCode: ZC03483472<br>Cat. No. : HY-13532<br>AS-252424                           | VialCode: ZC03583165<br>Cat. No. : HY-15610<br>GDC-0623                        | VialCode: ZC03583130<br>Cat. No. : HY-15294<br>CZC24832                      | VialCode: ZC03583160<br>Cat. No. : HY-12344A<br>UNC2025<br>(hydrochlori<br>de)    | Empty<br>G12 |
| H | Empty<br>H1 | VialCode: ZC03577889<br>Cat. No. : HY-103712C<br>Samuraciclib (hydroc<br>hloride hydrate) | VialCode: ZC03577945<br>Cat. No. : HY-P2478<br>Human PD-L1<br>inhibito<br>r V | VialCode: ZC03577897<br>Cat. No. : HY-112608<br>CHMFL-PI3KD-317            | VialCode: ZC03577905<br>Cat. No. : HY-19816A<br>Avitinib (maleate)                                     | VialCode: ZC03583159<br>Cat. No. : HY-116437<br>Selatinib                            | VialCode: ZC03483477<br>Cat. No. : HY-129099A<br>N-Desmethyltamoxifer<br>(hydrochloride) | VialCode: ZC03577913<br>Cat. No. : HY-13271<br>Tubastatin A<br>(Hydroc<br>hloride) | VialCode: ZC03577921<br>Cat. No. : HY-155840<br>KH16                           | VialCode: ZC03577929<br>Cat. No. : HY-144707<br>AK-778-XXMU                  | VialCode: ZC03577937<br>Cat. No. : HY-17389<br>Genipin                            | Empty<br>H12 |

# 17

Compound Library Layout: Rack FK00229765 (DMSO Solution, 10 mM, 80 Compounds)



|   | 1           | 2                                                                | 3                                                                            | 4                                                                          | 5                                                          | 6                                                                                           | 7                                                                                   | 8                                                                                  | 9                                                                | 10                                                                                       | 11                                                                       | 12           |
|---|-------------|------------------------------------------------------------------|------------------------------------------------------------------------------|----------------------------------------------------------------------------|------------------------------------------------------------|---------------------------------------------------------------------------------------------|-------------------------------------------------------------------------------------|------------------------------------------------------------------------------------|------------------------------------------------------------------|------------------------------------------------------------------------------------------|--------------------------------------------------------------------------|--------------|
| A | Empty<br>A1 | VialCode: ZC03583161<br>Cat. No.: HY-123976<br>MPT0G211          | VialCode: ZC03483451<br>Cat. No.: HY-12013<br>PD153035<br>(Hydrochloride)    | VialCode: ZC03483473<br>Cat. No.: HY-18161<br>CCT241736                    | VialCode: ZC03483458<br>Cat. No.: HY-13328<br>Sapanisertib | VialCode: ZC03468188<br>Cat. No.: HY-114311<br>FGFR1/DDR2<br>inhibitor<br>1                 | VialCode: ZC03468190<br>Cat. No.: HY-111361<br>FN-1501                              | VialCode: ZC03583154<br>Cat. No.: HY-13866<br>Ro 31-8220<br>(mesylate)             | VialCode: ZC03483462<br>Cat. No.: HY-B0873<br>Uniconazole        | VialCode: ZC03483454<br>Cat. No.: HY-10014<br>R547                                       | VialCode: ZC03583146<br>Cat. No.: HY-101047<br>D-erythro-Sphingosin<br>e | Empty<br>A12 |
| B | Empty<br>B1 | VialCode: ZC03583168<br>Cat. No.: HY-111184<br>PIK-108           | VialCode: ZC03583141<br>Cat. No.: HY-128763<br>HDAC-IN-4                     | VialCode: ZC03468187<br>Cat. No.: HY-136567<br>TBAP-001                    | VialCode: ZC03483459<br>Cat. No.: HY-15489<br>Scriptaid    | VialCode: ZC03483455<br>Cat. No.: HY-13343<br>ZM 336372                                     | VialCode: ZC03483446<br>Cat. No.: HY-18955<br>BI-847325                             | VialCode: ZC03483441<br>Cat. No.: HY-112155<br>MS4078                              | VialCode: ZC03583164<br>Cat. No.: HY-136252<br>BSJ-04-132        | VialCode: ZC03583162<br>Cat. No.: HY-12029<br>WZ8040                                     | VialCode: ZC03468185<br>Cat. No.: HY-32721<br>Neratinib                  | Empty<br>B12 |
| C | Empty<br>C1 | VialCode: ZC03483466<br>Cat. No.: HY-100434<br>PD-161570         | VialCode: ZC03483460<br>Cat. No.: HY-135680<br>I-OMe-Tyrphostin<br>AG<br>538 | VialCode: ZC03483461<br>Cat. No.: HY-136789<br>Tuxobertinib                | VialCode: ZC03483452<br>Cat. No.: HY-10221<br>Vorinostat   | VialCode: ZC03483453<br>Cat. No.: HY-13501<br>Mubritinib                                    | VialCode: ZC03483470<br>Cat. No.: HY-101042<br>AG-494                               | VialCode: ZC03483478<br>Cat. No.: HY-135960<br>BO-264                              | VialCode: ZC03483442<br>Cat. No.: HY-12050<br>CP-673451          | VialCode: ZC03583139<br>Cat. No.: HY-12036<br>GSK1059615                                 | VialCode: ZC03583151<br>Cat. No.: HY-16265<br>JI-101                     | Empty<br>C12 |
| D | Empty<br>D1 | VialCode: ZC03483474<br>Cat. No.: HY-101963<br>AD80              | VialCode: ZC03483447<br>Cat. No.: HY-114153<br>PLX5622                       | VialCode: ZC03483471<br>Cat. No.: HY-13984<br>Mutant EGFR<br>inhibito<br>r | VialCode: ZC03583157<br>Cat. No.: HY-17499<br>EGFR-IN-12   | VialCode: ZC03468147<br>Cat. No.: HY-136848<br>SM1-71                                       | VialCode: ZC03583166<br>Cat. No.: HY-10032<br>PF 477736                             | VialCode: ZC03583150<br>Cat. No.: HY-15644<br>Tyrphostin 23                        | VialCode: ZC03483443<br>Cat. No.: HY-108484<br>PP 3              | VialCode: ZC03583132<br>Cat. No.: HY-13772<br>Valrubicin                                 | VialCode: ZC03583163<br>Cat. No.: HY-112914<br>mTOR inhibitor-1          | Empty<br>D12 |
| E | Empty<br>E1 | VialCode: ZC03468158<br>Cat. No.: HY-117661<br>SPHINX31          | VialCode: ZC03516706<br>Cat. No.: HY-15463<br>Imatinib                       | VialCode: ZC03516714<br>Cat. No.: HY-10293<br>Aderbasib                    | VialCode: ZC03516722<br>Cat. No.: HY-100037<br>NT157       | VialCode: ZC03483423<br>Cat. No.: HY-10941<br>VER-155008                                    | VialCode: ZC03483407<br>Cat. No.: HY-50094<br>Pictilisib                            | VialCode: ZC03483390<br>Cat. No.: HY-19983<br>ASP5878                              | VialCode: ZC03468210<br>Cat. No.: HY-12273<br>DMH-1              | VialCode: ZC03516738<br>Cat. No.: HY-N0136<br>Taxifolin                                  | VialCode: ZC03468214<br>Cat. No.: HY-N0021<br>Verbascoside               | Empty<br>E12 |
| F | Empty<br>F1 | VialCode: ZC03516708<br>Cat. No.: HY-110066<br>(Z)-Guggulsterone | VialCode: ZC03516707<br>Cat. No.: HY-148409<br>MMRi62                        | VialCode: ZC03516715<br>Cat. No.: HY-100556<br>Tie2 kinase inhibito<br>r 1 | VialCode: ZC03483415<br>Cat. No.: HY-16026<br>Ricolinostat | VialCode: ZC03516723<br>Cat. No.: HY-P10091<br>CD24/Siglec-10<br>block<br>ing peptide, CSBP | VialCode: ZC03516731<br>Cat. No.: HY-15797<br>UNC2250                               | VialCode: ZC03516739<br>Cat. No.: HY-10999A<br>Trametinib (DMSO<br>sol<br>vate)    | VialCode: ZC03468215<br>Cat. No.: HY-13897<br>CNX-2006           | VialCode: ZC03483432<br>Cat. No.: HY-100585<br>Splitomicin                               | VialCode: ZC03483430<br>Cat. No.: HY-10115<br>PI-103                     | Empty<br>F12 |
| G | Empty<br>G1 | VialCode: ZC03468219<br>Cat. No.: HY-W019710<br>(E,E)-RGFP966    | VialCode: ZC03468218<br>Cat. No.: HY-13322<br>Pracinostat                    | VialCode: ZC03468224<br>Cat. No.: HY-10329<br>JNJ-7706621                  | VialCode: ZC03468203<br>Cat. No.: HY-N0014<br>Icariin      | VialCode: ZC03483424<br>Cat. No.: HY-101246<br>RPI-1                                        | VialCode: ZC03483422<br>Cat. No.: HY-100202<br>TPEN                                 | VialCode: ZC03516758<br>Cat. No.: HY-17507B<br>Pantoprazole<br>(sodium<br>hydrate) | VialCode: ZC03468222<br>Cat. No.: HY-15827<br>NSC 405020         | VialCode: ZC03516750<br>Cat. No.: HY-10197<br>Wortmannin                                 | VialCode: ZC03468223<br>Cat. No.: HY-108628<br>SU16f                     | Empty<br>G12 |
| H | Empty<br>H1 | VialCode: ZC03483450<br>Cat. No.: HY-18613<br>CAY10603           | VialCode: ZC03483457<br>Cat. No.: HY-12954<br>PTACH                          | VialCode: ZC03468220<br>Cat. No.: HY-B0075<br>Melatonin                    | VialCode: ZC03468221<br>Cat. No.: HY-N0480<br>Reserpine    | VialCode: ZC03468216<br>Cat. No.: HY-N1127<br>Tricin                                        | VialCode: ZC03483409<br>Cat. No.: HY-13418<br>Dorsomorphin<br>(dihydr<br>ochloride) | VialCode: ZC03483414<br>Cat. No.: HY-112711<br>LV-320                              | VialCode: ZC03483481<br>Cat. No.: HY-119757<br>Tyrphostin AG1433 | VialCode: ZC03483463<br>Cat. No.: HY-108136A<br>Bisindolylmaleimide<br>X (hydrochloride) | VialCode: ZC03483438<br>Cat. No.: HY-10262<br>BMS-536924                 | Empty<br>H12 |

# 18

Compound Library Layout: Rack FK00235571 (DMSO Solution, 10 mM, 33 Compounds)



|   | 1           | 2                                                                                  | 3                                                                                       | 4                                                                   | 5                                                                   | 6                                                            | 7           | 8           | 9           | 10           | 11           | 12           |
|---|-------------|------------------------------------------------------------------------------------|-----------------------------------------------------------------------------------------|---------------------------------------------------------------------|---------------------------------------------------------------------|--------------------------------------------------------------|-------------|-------------|-------------|--------------|--------------|--------------|
| A | Empty<br>A1 | VialCode: ZC03468208<br>Cat. No. : HY-110193<br>SPP-86<br>A2                       | VialCode: ZC03516728<br>Cat. No. : HY-112420<br>EGFR/ErbB-2/ErbB-4<br>inhibitor-2<br>A3 | VialCode: ZC03468213<br>Cat. No. : HY-10219<br>Rapamycin<br>A4      | VialCode: ZC03483398<br>Cat. No. : HY-B1756<br>Rotenone<br>A5       | VialCode: ZC03483431<br>Cat. No. : HY-12763<br>GNE-317<br>A6 | Empty<br>A7 | Empty<br>A8 | Empty<br>A9 | Empty<br>A10 | Empty<br>A11 | Empty<br>A12 |
| B | Empty<br>B1 | VialCode: ZC03468193<br>Cat. No. : HY-B1417<br>Nortriptyline (hydrochloride)<br>B2 | VialCode: ZC03583149<br>Cat. No. : HY-12048<br>Chelerythrine (chloride)<br>B3           | VialCode: ZC03483406<br>Cat. No. : HY-12034<br>WYE-354<br>B4        | VialCode: ZC03483399<br>Cat. No. : HY-19357<br>E3330<br>B5          | Empty<br>B6                                                  | Empty<br>B7 | Empty<br>B8 | Empty<br>B9 | Empty<br>B10 | Empty<br>B11 | Empty<br>B12 |
| C | Empty<br>C1 | VialCode: ZC03583145<br>Cat. No. : HY-10917<br>GW2580<br>C2                        | VialCode: ZC03483416<br>Cat. No. : HY-16585<br>VS-5584<br>C3                            | VialCode: ZC03483408<br>Cat. No. : HY-100020<br>BAY-1436032<br>C4   | VialCode: ZC03516751<br>Cat. No. : HY-10181<br>Dasatinib<br>C5      | Empty<br>C6                                                  | Empty<br>C7 | Empty<br>C8 | Empty<br>C9 | Empty<br>C10 | Empty<br>C11 | Empty<br>C12 |
| D | Empty<br>D1 | VialCode: ZC03483391<br>Cat. No. : HY-11109<br>Resatorvid<br>D2                    | VialCode: ZC03468207<br>Cat. No. : HY-12031A<br>U0126<br>D3                             | VialCode: ZC03468206<br>Cat. No. : HY-112285<br>FT895<br>D4         | VialCode: ZC03468205<br>Cat. No. : HY-18085<br>Quercetin<br>D5      | Empty<br>D6                                                  | Empty<br>D7 | Empty<br>D8 | Empty<br>D9 | Empty<br>D10 | Empty<br>D11 | Empty<br>D12 |
| E | Empty<br>E1 | VialCode: ZC03483400<br>Cat. No. : HY-100716<br>Eganelisib<br>E2                   | VialCode: ZC03468201<br>Cat. No. : HY-101097<br>PD-1-IN-17<br>E3                        | VialCode: ZC03516720<br>Cat. No. : HY-16018<br>Ilorasertib<br>E4    | VialCode: ZC03468211<br>Cat. No. : HY-15144<br>Trichostatin A<br>E5 | Empty<br>E6                                                  | Empty<br>E7 | Empty<br>E8 | Empty<br>E9 | Empty<br>E10 | Empty<br>E11 | Empty<br>E12 |
| F | Empty<br>F1 | VialCode: ZC03483392<br>Cat. No. : HY-10211<br>Tanespimycin<br>F2                  | VialCode: ZC03468202<br>Cat. No. : HY-12678<br>Entrectinib<br>F3                        | VialCode: ZC03516712<br>Cat. No. : HY-10517<br>Orantinib<br>F4      | VialCode: ZC03516729<br>Cat. No. : HY-103380<br>NSC 625987<br>F5    | Empty<br>F6                                                  | Empty<br>F7 | Empty<br>F8 | Empty<br>F9 | Empty<br>F10 | Empty<br>F11 | Empty<br>F12 |
| G | Empty<br>G1 | VialCode: ZC03468204<br>Cat. No. : HY-15727<br>Afuressertib<br>G2                  | VialCode: ZC03468212<br>Cat. No. : HY-15772<br>Osimertinib<br>G3                        | VialCode: ZC03516721<br>Cat. No. : HY-W018791<br>Bifendate<br>G4    | VialCode: ZC03468209<br>Cat. No. : HY-18708<br>Erdafitinib<br>G5    | Empty<br>G6                                                  | Empty<br>G7 | Empty<br>G8 | Empty<br>G9 | Empty<br>G10 | Empty<br>G11 | Empty<br>G12 |
| H | Empty<br>H1 | VialCode: ZC03516719<br>Cat. No. : HY-103691A<br>ARN5187 (trihydrochloride)<br>H2  | VialCode: ZC03516711<br>Cat. No. : HY-19730<br>Olmutinib<br>H3                          | VialCode: ZC03468195<br>Cat. No. : HY-118620<br>Nortriptyline<br>H4 | VialCode: ZC03516705<br>Cat. No. : HY-133178<br>Urolithin D<br>H5   | Empty<br>H6                                                  | Empty<br>H7 | Empty<br>H8 | Empty<br>H9 | Empty<br>H10 | Empty<br>H11 | Empty<br>H12 |

10 mM in H<sub>2</sub>O

Microplate

**1**

Compound

**23**

# 19

Compound Library Layout: Rack FK00227855 (H<sub>2</sub>O Solution, 10 mM, 23 Compounds)

|   | 1           | 2                                                                                   | 3                                                                                   | 4                                                                                   | 5           | 6           | 7           | 8           | 9           | 10           | 11           | 12           |
|---|-------------|-------------------------------------------------------------------------------------|-------------------------------------------------------------------------------------|-------------------------------------------------------------------------------------|-------------|-------------|-------------|-------------|-------------|--------------|--------------|--------------|
| A | Empty<br>A1 | VialCode: ZC03468129<br>Cat. No. : HY-13417A<br>AICAR (phosphate)                   | VialCode: ZC03468142<br>Cat. No. : HY-P1178<br>Cyclotraxin B                        | VialCode: ZC03468140<br>Cat. No. : HY-16397A<br>Phenformin (hydrochloride)          | Empty<br>A5 | Empty<br>A6 | Empty<br>A7 | Empty<br>A8 | Empty<br>A9 | Empty<br>A10 | Empty<br>A11 | Empty<br>A12 |
| B | Empty<br>B1 | VialCode: ZC03468149<br>Cat. No. : HY-B1370<br>Hydroxychloroquine (sulfate)         | VialCode: ZC03468134<br>Cat. No. : HY-13749B<br>Sitagliptin (phosphate monohydrate) | VialCode: ZC03468138<br>Cat. No. : HY-100542<br>D-α-Hydroxyglutaric acid (disodium) | Empty<br>B5 | Empty<br>B6 | Empty<br>B7 | Empty<br>B8 | Empty<br>B9 | Empty<br>B10 | Empty<br>B11 | Empty<br>B12 |
| C | Empty<br>C1 | VialCode: ZC03468141<br>Cat. No. : HY-103048A<br>PD-1/PD-L1-IN 3 (TFA)              | VialCode: ZC03468151<br>Cat. No. : HY-50767A<br>Palbociclib (monohydrochloride)     | VialCode: ZC03468130<br>Cat. No. : HY-123979A<br>ζ-Stat (trisodium)                 | Empty<br>C5 | Empty<br>C6 | Empty<br>C7 | Empty<br>C8 | Empty<br>C9 | Empty<br>C10 | Empty<br>C11 | Empty<br>C12 |
| D | Empty<br>D1 | VialCode: ZC03468143<br>Cat. No. : HY-Y0966<br>Glycine                              | VialCode: ZC03470350<br>Cat. No. : HY-79077<br>Osimertinib (dimethylate)            | VialCode: ZC03468131<br>Cat. No. : HY-118530<br>Bucillamine                         | Empty<br>D5 | Empty<br>D6 | Empty<br>D7 | Empty<br>D8 | Empty<br>D9 | Empty<br>D10 | Empty<br>D11 | Empty<br>D12 |
| E | Empty<br>E1 | VialCode: ZC03468135<br>Cat. No. : HY-135811A<br>Desethyl chloroquine (diphosphate) | VialCode: ZC03468137<br>Cat. No. : HY-50895A<br>Gefitinib (hydrochloride)           | VialCode: ZC03583158<br>Cat. No. : HY-17589<br>Chloroquine (phosphate)              | Empty<br>E5 | Empty<br>E6 | Empty<br>E7 | Empty<br>E8 | Empty<br>E9 | Empty<br>E10 | Empty<br>E11 | Empty<br>E12 |
| F | Empty<br>F1 | VialCode: ZC03470349<br>Cat. No. : HY-N0568<br>Madecassoside                        | VialCode: ZC03583148<br>Cat. No. : HY-10006<br>Flavopiridol (Hydrochloride)         | VialCode: ZC03468139<br>Cat. No. : HY-113596<br>Acetyl Coenzyme A (trisodium)       | Empty<br>F5 | Empty<br>F6 | Empty<br>F7 | Empty<br>F8 | Empty<br>F9 | Empty<br>F10 | Empty<br>F11 | Empty<br>F12 |
| G | Empty<br>G1 | VialCode: ZC03468133<br>Cat. No. : HY-15346A<br>Copanlisib (dihydrochloride)        | VialCode: ZC03468153<br>Cat. No. : HY-100561<br>Tempol                              | VialCode: ZC03686100<br>Cat. No. : HY-P0154<br>Epsilon-V1-2                         | Empty<br>G5 | Empty<br>G6 | Empty<br>G7 | Empty<br>G8 | Empty<br>G9 | Empty<br>G10 | Empty<br>G11 | Empty<br>G12 |
| H | Empty<br>H1 | VialCode: ZC03468150<br>Cat. No. : HY-B1016<br>Trapidil                             | VialCode: ZC03468148<br>Cat. No. : HY-110315<br>Ischemin (sodium)                   | Empty<br>H4                                                                         | Empty<br>H5 | Empty<br>H6 | Empty<br>H7 | Empty<br>H8 | Empty<br>H9 | Empty<br>H10 | Empty<br>H11 | Empty<br>H12 |

10 mM in Ethanol

Microplate

**1**

Compound

**5**

# 20

Compound Library Layout: Rack FK00229789 (Ethanol Solution, 10 mM, 5 Compounds)



|   | 1           | 2                                                                      | 3           | 4           | 5           | 6           | 7           | 8           | 9           | 10           | 11           | 12           |
|---|-------------|------------------------------------------------------------------------|-------------|-------------|-------------|-------------|-------------|-------------|-------------|--------------|--------------|--------------|
| A | Empty<br>A1 | VialCode: ZC03468197<br>Cat. No. : HY-100355<br>C18-Ceramide<br>A2     | Empty<br>A3 | Empty<br>A4 | Empty<br>A5 | Empty<br>A6 | Empty<br>A7 | Empty<br>A8 | Empty<br>A9 | Empty<br>A10 | Empty<br>A11 | Empty<br>A12 |
| B | Empty<br>B1 | VialCode: ZC03583138<br>Cat. No. : HY-N0107<br>Cyclovirobuxine D<br>B2 | Empty<br>B3 | Empty<br>B4 | Empty<br>B5 | Empty<br>B6 | Empty<br>B7 | Empty<br>B8 | Empty<br>B9 | Empty<br>B10 | Empty<br>B11 | Empty<br>B12 |
| C | Empty<br>C1 | VialCode: ZC03455983<br>Cat. No. : HY-N0596<br>Panaxadiol<br>C2        | Empty<br>C3 | Empty<br>C4 | Empty<br>C5 | Empty<br>C6 | Empty<br>C7 | Empty<br>C8 | Empty<br>C9 | Empty<br>C10 | Empty<br>C11 | Empty<br>C12 |
| D | Empty<br>D1 | VialCode: ZC03468178<br>Cat. No. : HY-N1441<br>Afzelin<br>D2           | Empty<br>D3 | Empty<br>D4 | Empty<br>D5 | Empty<br>D6 | Empty<br>D7 | Empty<br>D8 | Empty<br>D9 | Empty<br>D10 | Empty<br>D11 | Empty<br>D12 |
| E | Empty<br>E1 | VialCode: ZC03468196<br>Cat. No. : HY-12857<br>Brigatinib<br>E2        | Empty<br>E3 | Empty<br>E4 | Empty<br>E5 | Empty<br>E6 | Empty<br>E7 | Empty<br>E8 | Empty<br>E9 | Empty<br>E10 | Empty<br>E11 | Empty<br>E12 |
| F | Empty<br>F1 | Empty<br>F2                                                            | Empty<br>F3 | Empty<br>F4 | Empty<br>F5 | Empty<br>F6 | Empty<br>F7 | Empty<br>F8 | Empty<br>F9 | Empty<br>F10 | Empty<br>F11 | Empty<br>F12 |
| G | Empty<br>G1 | Empty<br>G2                                                            | Empty<br>G3 | Empty<br>G4 | Empty<br>G5 | Empty<br>G6 | Empty<br>G7 | Empty<br>G8 | Empty<br>G9 | Empty<br>G10 | Empty<br>G11 | Empty<br>G12 |
| H | Empty<br>H1 | Empty<br>H2                                                            | Empty<br>H3 | Empty<br>H4 | Empty<br>H5 | Empty<br>H6 | Empty<br>H7 | Empty<br>H8 | Empty<br>H9 | Empty<br>H10 | Empty<br>H11 | Empty<br>H12 |

2 mM in DMSO

Microplate

**1**

Compound

**35**

# 21

Compound Library Layout: Rack FK00229645 (DMSO Solution, 2 mM, 35 Compounds)



|   | 1           | 2                                                                                     | 3                                                                                    | 4                                                                                       | 5                                                                                     | 6                                                               | 7           | 8           | 9           | 10           | 11           | 12           |
|---|-------------|---------------------------------------------------------------------------------------|--------------------------------------------------------------------------------------|-----------------------------------------------------------------------------------------|---------------------------------------------------------------------------------------|-----------------------------------------------------------------|-------------|-------------|-------------|--------------|--------------|--------------|
| A | Empty<br>A1 | VialCode: ZC03470351<br>Cat. No. : HY-12432<br>Gilteritinib<br>A2                     | VialCode: ZC03468132<br>Cat. No. : HY-12963<br>Duberminatib<br>A3                    | VialCode: ZC03468155<br>Cat. No. : HY-129336<br>Abemaciclib<br>metaboli<br>te M20<br>A4 | VialCode: ZC03583167<br>Cat. No. : HY-15504A<br>RGB-286638 (free<br>base)<br>A5       | VialCode: ZC03468183<br>Cat. No. : HY-153358<br>TNG260<br>A6    | Empty<br>A7 | Empty<br>A8 | Empty<br>A9 | Empty<br>A10 | Empty<br>A11 | Empty<br>A12 |
| B | Empty<br>B1 | VialCode: ZC03468172<br>Cat. No. : HY-18767A<br>(R,S)-Ivrosidenib<br>B2               | VialCode: ZC03468180<br>Cat. No. : HY-13003<br>Torin 1<br>B3                         | VialCode: ZC03468182<br>Cat. No. : HY-16297A<br>Abemaciclib<br>B4                       | VialCode: ZC03468167<br>Cat. No. : HY-110171<br>iMDK<br>B5                            | VialCode: ZC03468152<br>Cat. No. : HY-107779<br>BI-882370<br>B6 | Empty<br>B7 | Empty<br>B8 | Empty<br>B9 | Empty<br>B10 | Empty<br>B11 | Empty<br>B12 |
| C | Empty<br>C1 | VialCode: ZC03468177<br>Cat. No. : HY-131521<br>Oxalomalic acid (tri<br>sodium)<br>C2 | VialCode: ZC03468170<br>Cat. No. : HY-N0741<br>Leonurine<br>C3                       | VialCode: ZC03468174<br>Cat. No. : HY-100946<br>CEP-40783<br>C4                         | VialCode: ZC03583142<br>Cat. No. : HY-13595<br>Chrysophanol<br>C5                     | VialCode: ZC03468159<br>Cat. No. : HY-12035<br>AMG-208<br>C6    | Empty<br>C7 | Empty<br>C8 | Empty<br>C9 | Empty<br>C10 | Empty<br>C11 | Empty<br>C12 |
| D | Empty<br>D1 | VialCode: ZC03468169<br>Cat. No. : HY-P1812<br>AUNP-12<br>D2                          | VialCode: ZC03583144<br>Cat. No. : HY-144993<br>PI3K $\delta$ / $\gamma$ -IN-1<br>D3 | VialCode: ZC03455989<br>Cat. No. : HY-101467A<br>Trilaciclib (hydroch<br>loride)<br>D4  | VialCode: ZC03468191<br>Cat. No. : HY-W278944<br>Antiproliferative ag<br>ent-15<br>D5 | Empty<br>D6                                                     | Empty<br>D7 | Empty<br>D8 | Empty<br>D9 | Empty<br>D10 | Empty<br>D11 | Empty<br>D12 |
| E | Empty<br>E1 | VialCode: ZC03468161<br>Cat. No. : HY-10683<br>PKI-402<br>E2                          | VialCode: ZC03468179<br>Cat. No. : HY-13011<br>Alectinib<br>E3                       | VialCode: ZC03468164<br>Cat. No. : HY-10330<br>Toceranib<br>E4                          | VialCode: ZC03468189<br>Cat. No. : HY-W340839<br>p53-MDM2-IN-1<br>E5                  | Empty<br>E6                                                     | Empty<br>E7 | Empty<br>E8 | Empty<br>E9 | Empty<br>E10 | Empty<br>E11 | Empty<br>E12 |
| F | Empty<br>F1 | VialCode: ZC03468162<br>Cat. No. : HY-10681<br>Gedatolisib<br>F2                      | VialCode: ZC03468171<br>Cat. No. : HY-N0656A<br>(+)-Usnic acid<br>F3                 | VialCode: ZC03468163<br>Cat. No. : HY-10330A<br>Toceranib<br>(phosphate<br>)<br>F4      | VialCode: ZC03468176<br>Cat. No. : HY-13431<br>KU-0060648<br>F5                       | Empty<br>F6                                                     | Empty<br>F7 | Empty<br>F8 | Empty<br>F9 | Empty<br>F10 | Empty<br>F11 | Empty<br>F12 |
| G | Empty<br>G1 | VialCode: ZC03583155<br>Cat. No. : HY-138946<br>XY028-140<br>G2                       | VialCode: ZC03468165<br>Cat. No. : HY-126216<br>TAM-IN-2<br>G3                       | VialCode: ZC03468173<br>Cat. No. : HY-10186<br>TG 100801<br>G4                          | VialCode: ZC03468160<br>Cat. No. : HY-100491<br>H3B-6527<br>G5                        | Empty<br>G6                                                     | Empty<br>G7 | Empty<br>G8 | Empty<br>G9 | Empty<br>G10 | Empty<br>G11 | Empty<br>G12 |
| H | Empty<br>H1 | VialCode: ZC03468186<br>Cat. No. : HY-13011A<br>Alectinib (Hydrochlo<br>ride)<br>H2   | VialCode: ZC03468181<br>Cat. No. : HY-164056<br>EGFR<br>T790M/L858R-IN-<br>8<br>H3   | VialCode: ZC03468166<br>Cat. No. : HY-114428<br>P110 $\delta$ -IN-1<br>H4               | VialCode: ZC03468175<br>Cat. No. : HY-100848<br>TX1-85-1<br>H5                        | Empty<br>H6                                                     | Empty<br>H7 | Empty<br>H8 | Empty<br>H9 | Empty<br>H10 | Empty<br>H11 | Empty<br>H12 |

2 mM in H<sub>2</sub>O

Microplate

**1**

Compound

**1**

# 22

Compound Library Layout: Rack FK00226095 (H<sub>2</sub>O Solution, 2 mM, 1 Compounds)



|   | 1           | 2                                                                                   | 3           | 4           | 5           | 6           | 7           | 8           | 9           | 10           | 11           | 12           |
|---|-------------|-------------------------------------------------------------------------------------|-------------|-------------|-------------|-------------|-------------|-------------|-------------|--------------|--------------|--------------|
| A | Empty<br>A1 | VialCode: ZC03468184<br>Cat. No. : HY-112272A<br>Lerociclib (dihydrochloride)<br>A2 | Empty<br>A3 | Empty<br>A4 | Empty<br>A5 | Empty<br>A6 | Empty<br>A7 | Empty<br>A8 | Empty<br>A9 | Empty<br>A10 | Empty<br>A11 | Empty<br>A12 |
| B | Empty<br>B1 | Empty<br>B2                                                                         | Empty<br>B3 | Empty<br>B4 | Empty<br>B5 | Empty<br>B6 | Empty<br>B7 | Empty<br>B8 | Empty<br>B9 | Empty<br>B10 | Empty<br>B11 | Empty<br>B12 |
| C | Empty<br>C1 | Empty<br>C2                                                                         | Empty<br>C3 | Empty<br>C4 | Empty<br>C5 | Empty<br>C6 | Empty<br>C7 | Empty<br>C8 | Empty<br>C9 | Empty<br>C10 | Empty<br>C11 | Empty<br>C12 |
| D | Empty<br>D1 | Empty<br>D2                                                                         | Empty<br>D3 | Empty<br>D4 | Empty<br>D5 | Empty<br>D6 | Empty<br>D7 | Empty<br>D8 | Empty<br>D9 | Empty<br>D10 | Empty<br>D11 | Empty<br>D12 |
| E | Empty<br>E1 | Empty<br>E2                                                                         | Empty<br>E3 | Empty<br>E4 | Empty<br>E5 | Empty<br>E6 | Empty<br>E7 | Empty<br>E8 | Empty<br>E9 | Empty<br>E10 | Empty<br>E11 | Empty<br>E12 |
| F | Empty<br>F1 | Empty<br>F2                                                                         | Empty<br>F3 | Empty<br>F4 | Empty<br>F5 | Empty<br>F6 | Empty<br>F7 | Empty<br>F8 | Empty<br>F9 | Empty<br>F10 | Empty<br>F11 | Empty<br>F12 |
| G | Empty<br>G1 | Empty<br>G2                                                                         | Empty<br>G3 | Empty<br>G4 | Empty<br>G5 | Empty<br>G6 | Empty<br>G7 | Empty<br>G8 | Empty<br>G9 | Empty<br>G10 | Empty<br>G11 | Empty<br>G12 |
| H | Empty<br>H1 | Empty<br>H2                                                                         | Empty<br>H3 | Empty<br>H4 | Empty<br>H5 | Empty<br>H6 | Empty<br>H7 | Empty<br>H8 | Empty<br>H9 | Empty<br>H10 | Empty<br>H11 | Empty<br>H12 |

3 mg/mL in H<sub>2</sub>O

Microplate

**1**

Compound

**3**

# 23

Compound Library Layout: Rack FK00229580 (H<sub>2</sub>O Solution, 3 mg/mL, 3 Compounds)



|   | 1           | 2                                                                                         | 3           | 4           | 5           | 6           | 7           | 8           | 9           | 10           | 11           | 12           |
|---|-------------|-------------------------------------------------------------------------------------------|-------------|-------------|-------------|-------------|-------------|-------------|-------------|--------------|--------------|--------------|
| A | Empty<br>A1 | VialCode: ZC03468198<br>Cat. No. : HY-17567C<br>Heparin (sodium salt)<br>(MW 15kDa)<br>A2 | Empty<br>A3 | Empty<br>A4 | Empty<br>A5 | Empty<br>A6 | Empty<br>A7 | Empty<br>A8 | Empty<br>A9 | Empty<br>A10 | Empty<br>A11 | Empty<br>A12 |
| B | Empty<br>B1 | VialCode: ZC03468192<br>Cat. No. : HY-106381<br>Aurothiomalate (sodium)<br>B2             | Empty<br>B3 | Empty<br>B4 | Empty<br>B5 | Empty<br>B6 | Empty<br>B7 | Empty<br>B8 | Empty<br>B9 | Empty<br>B10 | Empty<br>B11 | Empty<br>B12 |
| C | Empty<br>C1 | VialCode: ZC03468199<br>Cat. No. : HY-17567B<br>Heparin (Lithium salt)<br>C2              | Empty<br>C3 | Empty<br>C4 | Empty<br>C5 | Empty<br>C6 | Empty<br>C7 | Empty<br>C8 | Empty<br>C9 | Empty<br>C10 | Empty<br>C11 | Empty<br>C12 |
| D | Empty<br>D1 | Empty<br>D2                                                                               | Empty<br>D3 | Empty<br>D4 | Empty<br>D5 | Empty<br>D6 | Empty<br>D7 | Empty<br>D8 | Empty<br>D9 | Empty<br>D10 | Empty<br>D11 | Empty<br>D12 |
| E | Empty<br>E1 | Empty<br>E2                                                                               | Empty<br>E3 | Empty<br>E4 | Empty<br>E5 | Empty<br>E6 | Empty<br>E7 | Empty<br>E8 | Empty<br>E9 | Empty<br>E10 | Empty<br>E11 | Empty<br>E12 |
| F | Empty<br>F1 | Empty<br>F2                                                                               | Empty<br>F3 | Empty<br>F4 | Empty<br>F5 | Empty<br>F6 | Empty<br>F7 | Empty<br>F8 | Empty<br>F9 | Empty<br>F10 | Empty<br>F11 | Empty<br>F12 |
| G | Empty<br>G1 | Empty<br>G2                                                                               | Empty<br>G3 | Empty<br>G4 | Empty<br>G5 | Empty<br>G6 | Empty<br>G7 | Empty<br>G8 | Empty<br>G9 | Empty<br>G10 | Empty<br>G11 | Empty<br>G12 |
| H | Empty<br>H1 | Empty<br>H2                                                                               | Empty<br>H3 | Empty<br>H4 | Empty<br>H5 | Empty<br>H6 | Empty<br>H7 | Empty<br>H8 | Empty<br>H9 | Empty<br>H10 | Empty<br>H11 | Empty<br>H12 |
