# Supplementary material
Source: Research Square preprint supplement (doi:10.21203/rs.3.rs-9564432/v1)
Supplement: Supplementary file 2 [file 41f015bb40e59a808857d81f.xlsx]

## Sheet: Sheet1
Compound Name Cell Line	U251	U251	U251	LN229	LN229	LN229	A172	A172	A172
Panobinostat (lactate)	15.5513	15.9292	14.5059	46.6894	49.0385	44.0117	34.0539	44.7969	39.3945
(S)-PI3Kα-IN-4	57.1417	58.9554	62.0539	84.5667	89.7274	86.5871	88.3566	103.739	96.1304
Abemaciclib metabolite M2	44.0549	32.5678	68.7043	63.9484	74.3427	68.4883	84.9749	88.3566	97.4191
SU11652	79.4987	72.294	82.3579	80.4771	73.4299	80.1728	94.5529	99.2646	100.605
3-Hydroxy-4-carboxyalkylamidino-5-arylamino-isothiazoles	51.7004	73.541	71.425	89.9951	94.9489	97.1641	102.739	114.204	119.565
FLT3-IN-17	35.6033	40.1125	36.6866	69.036	77.4343	81.1465	61.4475	60.53	57.5916
Methyl 2,5-dihydroxycinnamate	71.6643	60.2024	68.8933	86.3681	91.48	80.4163	99.512	102.729	108.595
Aumitin	68.4776	76.249	72.4578	97.4075	84.9805	84.8953	94.522	94.2849	94.955
GSK321	54.7989	66.5757	72.1177	94.9002	92.1373	84.2989	97.914	98.0996	95.0684
Ceritinib dihydrochloride	61.336	73.5158	82.2949	85.723	76.7283	90.9688	87.8824	92.8724	90.5011
ALW-II-41-27	34.4823	58.4138	50.8187	67.8676	67.4903	75.1947	81.418	87.3772	92.295
Lifirafenib	63.9306	80.7078	81.325	87.0253	89.0336	83.8486	101.368	103.399	106.461
AZ7550 Mesylate	72.4578	81.7659	80.393	84.8101	84.3963	83.2035	101.038	95.2128	99.677
Hydroxychloroquine	73.4402	69.8631	71.3746	88.5346	88.3277	84.6519	110.997	100.76	106.141
Quisinostat	22.1136	25.9426	22.0758	41.7965	44.7663	48.1621	38.147	39.6007	42.539
CP-547632 (hydrochloride)	76.1483	77.3197	84.0457	91.2853	85.1753	85.6743	105.378	100.626	93.4601
Evixapodlin	72.4956	83.038	73.8937	89.2162	96.9937	84.1529	92.4497	102.203	93.0889
BBT594	58.8546	70.4047	58.0611	89.5813	98.3812	90.2142	96.9758	90.3671	94.955
Mutated EGFR-IN-1	74.3633	81.816	90.2023	107.691	96.4321	103.251	89.0357	94.4753	99.0438
BI-1622	92.0368	99.2766	89.5881	77.8363	77.8116	76.8374	84.3928	83.1391	85.0515
SKLB4771	87.1393	75.0021	106.377	89.2429	91.3146	88.1454	96.3133	100.616	92.5417
PD-1/PD-L1-IN-33	92.8886	102.184	100.456	105.237	94.903	85.8271	92.8392	101.849	94.6878
Enbezotinib (enantiomer)	84.6496	105.509	100.456	84.3473	88.9716	92.4244	104.877	99.915	92.6161
Sotuletinib	87.5161	90.5135	99.9891	94.6317	95.5689	86.1847	104.717	101.902	100.202
Ribociclib succinate	75.2887	75.4935	81.8733	77.639	84.7542	84.076	76.2652	77.8695	89.9175
KW-2449	84.7643	81.9388	89.2605	90.9816	95.1003	91.3269	83.5429	85.5827	90.9268
CL-387785	45.224	71.0792	68.3356	72.7557	79.8093	70.3881	83.511	91.6599	84.0635
Hispidin	93.8631	95.3864	95.5666	95.7416	88.8236	99.589	88.5788	106.141	96.8871
Dalmelitinib	81.1772	87.3523	92.5528	71.8925	94.1878	81.77	75.9464	81.1736	84.4353
ACY-957	97.3684	103.683	100.063	85.5804	84.1746	87.5905	87.7714	107.533	93.5404
PD-1/PD-L1-IN-9 (hydrochloride)	90.7101	89.0557	99.1292	91.2652	82.4606	90.9446	96.3983	97.2695	92.9029
SU5204	96.6559	99.252	90.62	75.9126	87.5905	85.5434	112.197	98.6295	102.274
Motesanib	104.436	98.302	103.846	90.2787	78.8351	87.5165	100.552	85.1259	94.3266
CUR5g	96.9425	90.5709	102.282	97.7393	92.3504	87.9727	98.4595	109.594	99.8088
CDK8-IN-12	74.0602	80.8905	76.9021	96.3335	90.8583	92.5847	99.4688	95.8353	95.3147
T-1-PMPA	89.5717	86.5742	92.5118	89.4772	99.8849	96.8514	107.533	100.701	104.207
BRD6688	81.5981	88.8454	98.7135	94.8274	100.182	101.984	96.7232	97.5354	92.7574
SRX3177	52.1294	75.9409	75.1898	77.4192	69.1592	80.1979	64.311	63.8364
trans-Pralsetinib	71.1866	77.5949	75.1578	89.8917	88.1661	93.0891	109.633	98.5585	103.716
Futibatinib	97.6668	101.662	83.9632	88.2295	92.0106	75.922	91.9453	79.6575	87.5892
ALW-II-49-7	80.9509	90.3795	96.652	95.1573	97.7076	96.4388	95.3415	111.131	88.9076
AV-412 (free base)	72.0016	70.851	83.308	93.4063	90.2089	92.3025	92.9156	98.8538	96.4068
MT 63-78	99.177	94.2469	101.806	106.437	90.0947	103.367	99.4445	107.503	117.586
Higenamine (hydrochloride)	83.3959	90.3875	94.2948	104.229	106.247	99.7124	114.949	100.805	105.562
BMS-1166 (hydrochloride)	73.5677	84.0751	93.0963	98.8876	104.318	95.1065	104.929	100.763	89.224
Larotrectinib	83.9872	101.454	84.2589	100.004	97.2255	99.0018	94.0336	91.6605	108.789
BGT226	20.0959	20.4555	22.4051	41.3086	40.1159	43.3768	53.4999	56.8013	59.0162
Roginolisib (hemifumarate)	82.6848	79.137	90.7471	86.3263	89.9551	92.607	91.3652	102.672	89.4033
BMS-8	76.1806	75.7571	76.3564	92.3151	89.0162	95.9313	90.5003	93.6645	103.748
Canertinib (dihydrochloride)	87.5829	83.7875	80.3516	89.4857	78.891	93.1526	95.8583	87.0407	96.9764
Glaucocalyxin A	39.6884	39.4327	41.8058	52.2331	57.3211	53.9714	73.2447	86.6294	84.1929
S49076	83.4758	85.793	87.2313	90.8052	95.2207	89.5364	92.3672	107.988	91.3968
SJF-0628	86.4003	85.1858	89.6444	95.2461	126.472	115.928	102.419	104.412	104.897
Selumetinib	78.4339	53.36	97.0356	104.915	92.1248	96.2231	97.3561	105.33	97.7252
NVP-BAG956	34.5992	37.0661	35.3203	56.2127	64.2815	71.0388	56.8669	73.0253	60.2443
Lapatinib (ditosylate monohydrate)	82.5246	89.7202	92.7032	77.7023	93.922	89.9754	98.0575	99.7903	93.8413
GDC-0349	33.0963	37.271	33.4	70.5235	74.2476	76.1682	64.6922	69.5486	63.3899
Taurolidine	77.0519	88.316	82.4259	102.928	91.8492	87.481	102.627	114.679	110.253
SQLE-IN-1	65.2338	82.6081	91.3977	93.1022	85.4198	98.3253	94.1724	110.684	101.722
Pep2m, myristoylated (TFA)	92.4223	82.8434	85.9174	93.3365	91.3924	97.8686	98.4107	94.5918	106.854
Amuvatinib	61.1578	83.2077	75.7236	88.8512	96.5804	84.8109	88.3779	91.3469	94.6911
trans-Zeatin	71.3516	78.6763	82.7674	90.4204	95.5264	100.223	102.505	97.9912	83.3671
PIK-293	70.881	82.2437	83.8073	92.2356	96.557	91.9077	86.1594	95.6293	93.2122
SBI-0206965	84.073	79.1165	86.2059	87.7503	103.361	102.6	103.035	113.587	121.202
PI3Kδ-IN-1	86.7144	87.5114	90.2667	84.7289	87.4575	95.9831	104.349	98.6204	104.371
Ripretinib	88.3539	78.0766	88.1035	83.0308	97.5173	87.2116	106.368	112.781	97.627
Cabozantinib	91.8227	103.459	90.7449	86.4621	85.1505	78.8148	94.062	95.85	97.4946
Telatinib	91.4356	90.3046	93.4395	82.7263	81.0634	88.9683	98.5652	109.878	95.3644
AZD7507	91.4736	94.7374	96.3769	87.9377	86.5792	93.7581	91.4573	95.8832	101.567
Sulforaphene	98.3124	91.0864	87.3292	94.3085	88.1134	86.5909	94.1834	116.887	108.995
Naquotinib	70.9493	67.3211	64.0725	83.6632	93.8752	81.5435	84.4818	88.0468	92.1968
[D-Leu-4]-OB3	79.5416	86.4336	79.7844	86.8369	99.6955	84.9631	88.2455	115.584	108.664
CUDC-101	61.1034	65.5044	68.6967	58.8204	61.8078	60.2879	95.0994	96.3202	96.7306
Avitinib	100.496	98.4503	102.386	76.0211	88.3267	86.0102	77.5038	96.5201	90.9846
PD-1/PD-L1-IN-10	101.534	93.011	110.662	75.4341	93.2112	88.3372	84.1127	101.793	87.6907
Mutant IDH1 inhibitor	98.4348	95.506	100.48	88.2009	88.4315	86.6811	112.727	84.0811	79.0718
AMG-458	99.7211	98.0474	106.602	83.1173	78.4214	94.4481	98.1934	114.421	124.65
SANT 2	92.3756	98.6363	95.289	81.9119	83.1068	85.3184	94.8153	110.59	107.538
B-Raf IN 11	90.4231	94.3592	93.1195	98.1691	100.36	88.0961	90.3743	106.402	124.461
RET V804M-IN-1	72.3694	67.7824	78.5371	83.8405	90.3916	96.8904	85.7438	81.2712	89.6692
IITZ-01	96.9682	101.652	91.4772	99.5265		97.3816	82.537	95.9661	93.0127
FD223	85.5018	88.7758	84.474	94.8886	96.5042	94.4847	92.4776	95.6677	101.976
LSD1-IN-24	86.3386	86.5588	77.2359	87.4791	91.2535	93.3705	99.9588	109.292	112.668
Rezivertinib	85.7367	83.461	87.8215	80.0139	83.9415	134.652	99.3517	99.3929	98.8166
JCN037	72.9782	70.3942	78.2049	83.9554	87.3538	79.0947	78.2355	83.9468	82.6399
MC180295	42.7925	49.0029	48.4743	58.0223	54.0947	67.117	50.3585	50.1938	60.649
XRK3F2	87.4104	84.6943	90.2733	93.5933	86.2117	102.006	99.0533	101.039	113.069
TAK-733	81.2734	79.0271	80.0548	94.61	95.6128	97.4652	112.04	93.7434	106.514
NSC622608	43.6147	16.8351	44.6277	59.8278	71.9313	55.3795	52.7047	60.011	63.2422
OMS14	100.066	97.2472	95.8084	103.76	102.604	113.426	111.834	112.74
Martinostat (hydrochloride)	48.0339	65.7254	65.5639	46.3649		44.8747	36.1678	39.5225	38.5758
LY456236	92.549	93.4886	99.9046	91.546	80.8496	96.7827	80.5097	95.2252	79.0485
GSK864	91.9324	93.9585	93.4446	106.685	99.2479	100.738	103.406	110.455	106.679
Nampt-IN-3	87.0433	91.2864	90.4642	100.696	98.8301	91.4903	106.02	106.936	110.815
CRT0066854 (hydrochloride)	86.9406	90.3761	87.337	91.6156	99.0669	113.37	94.6078	102.923	84.1526
FT-1518	80.2897	87.6012	94.6045	98.8022	99.1365	102.493	102.953	93.1156	100.823
AS-041164	96.8361	101.813	83.1967	99.1086	90.8217	100.864	103.859	107.018	104.322
FLT3-IN-6	70.5851	72.1707	81.0972	89.0669	89.8886	95.2228	97.0055	95.3693	91.6955
3BDO	75.736	103.601	103.247	118.887	117.618	112.644	99.6838	95.237	96.4426
Paxalisib	56.9022	63.0825	58.4434	87.5433	82.6125	82.2953	59.6924	52.9728	50.7395
ASCT2-IN-1	91.2716	103.648	86.9561	99.8126	95.9631	89.0138
EACC	99.0085	83.6425	93.0594	88.7399	87.5865	76.2687	80.4934	76.7581	72.2817
Mefatinib (free base)	49.196	53.3265	50.7527	87.7739	82.3818	87.6586	80.5527	77.9439	79.2681
VEGFR-2-IN-6	86.093	72.4377	94.0149	90.4268	86.0006	101.052	97.3517	86.798	94.0907
PD-089828	90.7938	78.1095	85.3378	103.201	114.446	101.211	95.573	105.425	96.9268
SYN1143	90.5318	88.9443	89.0984	90.4412	86.0294	86.1015	101.067	110.119	141.148
PD-1/PD-L1-IN-9	86.7095	85.831	88.0812	107.367	97.9815	103.705	99.0415	91.7982	87.6873
RU-302	93.6142	104.804	100.75	97.9383	103.705	105.753	81.1061	93.9128	92.065
ENMD-2076 (Tartrate)	54.8369	64.0072	63.0208	71.9435	89.2878	88.3939	75.4933	60.473	76.9657
ITF 3756	92.5045	100.211	95.2325	75.2018	90.47	105.536
LMTK3-IN-1	74.8421	82.3633	87.9887	75.6632	73.861	76.2399	70.167	72.173	66.0562
HDACs/mTOR Inhibitor 1	26.4321	24.4747	23.3188	37.8172	39.9366	48.4862	31.5393	31.9049	28.802
IGF-1R/SRC-IN-1	89.607	80.6679	88.0812	75.0577	77.177	92.8633	78.5072	80.2365	88.1419
ACY-775	83.5808	89.4529	91.0558	66.9118	76.9319	94.3339	90.1479	89.1696	78.1613
SRI 31215 (TFA)	78.017	100.935	101.212	79.8875	91.3495	102.321	92.3713	103.933	91.393
EMI56	87.9887	85.8002	97.791	78.5755	82.526	80.9977	71.9556	82.539	84.9402
5-Phenylpentan-2-one	102.073	96.0341	93.3174	117.138	111.541	109.625	112.785	108.608	96.3763
ZM 306416	84.3162	95.4122	90.1915	84.1598	91.7782	84.6878	85.2803	88.2578	92.542
Dacomitinib (hydrate)	96.3778	78.9155	95.5759	83.8279	81.9422	86.6641	90.3785	94.6841	88.3863
CGP-82996	90.1752	93.6283	96.3287	99.8944	96.9074	86.2718	94.8662	114.948	106.155
MMRi64	87.3439	88.3749	93.7593	100.694	104.888	95.8815	96.8047	97.9829	100.264
Cobimetinib	86.8366	94.4466	107.719	85.0649	101.69	100.468	114.006	99.6859	107.729
Tucatinib	96.7051	93.3665	96.0341	93.8751	91.2954	92.2911	90.1857	94.7055	98.4756
Cediranib (maleate)	75.6097	73.2039	74.0386	87.4334	95.6854	102.791	95.7123	85.8694	95.7123
Leniolisib	86.3456	94.152	93.4483	103.922	96.7867	86.6339	98.9683	95.4659	97.8758
BGT226 (maleate)	26.7907	27.3144	31.144	32.7621	28.7794	26.9087	50.2142	56.437	57.6044
Pimelic Diphenylamide 106	105.772	89.946	101.435	97.4656	90.6316	89.6661	102.374	114.006	106.744
GNE-9815	93.7756	99.5036	103.939	88.2933	78.759	89.9377	97.1153	100.029	91.7601
Verteporfin	97.4743	100.895	100.126	106.427	110.726	109.972	90.0893	100.157	93.2489
Pyrazoloadenine	85.6746	78.8828	97.2779	87.8106	79.0457	87.9916	85.773	97.2332	76.1335
PI3Kα-IN-9	64.0064	65.3811	70.4217	85.9248	82.6512	84.2805	75.0625	67.8544	58.6541
DKFZ-748	90.0933	90.9607	94.5939	89.3192	99.291	90.8579	99.3967	97.1689	91.3852
HG-7-85-01	106.77	94.8885	100.158	96.3794	103.515	112.687	101.528	97.7151	99.568
Ensartinib	85.5928	87.4912	90.7152	103.274	104.888	113.879	88.9111	91.803	93.7416
ADDA 5 hydrochloride	121.693	115.555	118.472	118.027	107.562	105.294	110.436	125.764	110.953
PD0325901-O-C2-dioxolane	105.168	92.8758	122.637	97.1294	95.5477	93.8541	113.46	117.036	107.181
HDAC-IN-40	53.5705	67.0095	61.6811	58.7846	70.6396	68.2909		61.2761	70.878
Quizartinib	92.1676	105.185	94.4103	82.1749	75.7362	83.0058	109.033	109.493	103.973
AS1708727	97.007	104.578	87.48	89.3326	99.6857	82.4146	99.1203	108.849	119.67
KD 5170	103.246	100.481	97.3948	77.4298	94.8287	80.8489	109.665	112.103	111.827
PI3K-IN-31	84.7821	88.205	88.0364	82.2868	86.8083	89.9717	74.9142	85.7811	78.6515
limertinib	92.0159	90.3465	102.538	81.2004	94.5891	61.293	102.777	97.4529	115.3
Regorafenib (monohydrate)	91.1053	97.3274	95.2871	96.7619	95.4838	97.7046	96.9584	104.973	105.41
Omipalisib	27.6874	29.1038	32.0209	49.6458	44.7409	47.9043	72.8214	70.9585	72.5569
MPT0B390	62.9121	69.8929	72.4391	49.6298	53.9915	54.9502	47.8679	42.1527	40.4163
Bisindolylmaleimide II	100.919	93.5503	101.138	98.4875	98.3277	106.732	102.432	100.65	109.274
TML-6	114.021	130.411	113.211	90.8025	92.1606	100.501	106.112	102.674	104.686
MTX-531	101.003	97.9513	102.319	97.5129	91.9848	93.3748	100.776	109.757	100.385
RSH-7	83.9727	89.5371	88.2556	81.2962	79.0435	74.6338	74.4083	88.5524	85.2291
Hydroxygenkwanin	103.904	116.078	116.145	93.7263	76.0717	106.188	100.65	98.7983	95.4175
OK2	103.044	105.758	110.446	113.506	103.76	112.899	115.254	101.823	105.479
PI3Kγ inhibitor AZ2	96.3494	102.167	109.013	104.351	105.262	104.031	120.061	116.864	99.7413
SKLB-23bb	34.9915	38.4162	33.8292	52.808	53.6926	52.6719	40.2713	47.2906	42.7535
JNJ-38158471	90.919	103.611	111.777	85.9599	93.4313	91.2266	92.8858	96.253	102.611
D-(+)-Sorbose	91.9727	109.283	89.4313	85.3338	91.6213	88.1645	96.4666	92.9773	111.299
Serabelisib	88.579	82.7987	101.581	82.4079	85.6332	98.7252	87.3517	87.6263	111.696
N6-Benzyladenosine	62.9475	64.2027	55.633	93.0638	87.1983	79.7677	93.6386	91.0343	98.491
FIIN-3	102.557	111.22	101.24	68.4585	67.9413	64.5935	68.491	89.1726	76.019
Pirfenidone	99.0237	96.9627	99.3026	95.704	87.4024	86.3817	98.9793	97.4331	97.5348
Bozitinib	92.0347	83.682	99.4731	96.9969	87.7835	92.1112	100.678	94.1472	86.9142
Tenovin-6	76.6441	87.0697	82.3004	113.657	125.68	109.5	100.025	99.1781	101.295
EGFR-IN-8	82.3841	52.2117	100.273	104.453	85.6012	97.8476	102.001	101.81	93.6243
X-376	83.5722	75.7907	73.5984	131.47	125.755	159.822	84.6086	89.8553	84.3761
Tubastatin A	71.1217	78.9702	75.5396	99.1836	118.407	97.996	101.42	95.9072	93.7571
FIIN-2	71.5066	84.4759	80.058	94.953	139.56	142.529	80.4494	70.5371	73.2103
DDR1-IN-1	81.6143	71.5234	74.4352	88.4958	114.102	127.684	98.5223	90.287	98.9208
AZD3458	78.1168	80.9951	78.6857	114.622	118.036	82.1128	96.1646	93.7239	83.6041
PKC-iota inhibitor 1	74.4854	62.47	67.6075	70.757	122.86	132.063	99.6762	91.773	92.5367
TH34	77.1294	79.7567	73.1633	93.8397	91.9099	80.5541	95.542	94.3382	97.9329
c-Fms-IN-10	82.8694	92.7762	90.333	113.137	121.376	108.09	106.384	111.871	112.029
KU-0063794	53.6844	30.8585	32.3478	53.4635	62.0731	63.1122	47.0183	59.7117	61.9614
Givinostat (hydrochloride monohydrate)	83.5387	84.0408	87.4379	71.8703	65.1904	74.2454	91.5654	97.3933	94.8944
Dabrafenib	78.9368	83.4885	83.9069	122.934	99.4062	97.0312	97.5593	93.0597	96.065
MK-8033 (hydrochloride)	75.1548	77.6147	86.233	107.496	101.039	99.4062	98.2981	93.9646	94.5956
GDC-0326	74.8201	68.9964	74.2678	100.148	105.492	75.4329	85.9452	81.869	84.4757
PD0166285	64.9634	64.6287	72.4103	67.1944	70.8312	79.2182	68.8353	69.6405	71.965
Ningetinib	92.2072	89.8309	91.4709	132.583	93.5428	124.79	99.3525	88.7428	99.7509
CC-115	55.3411	58.3366	50.0864	59.6981	67.8624	80.4799	64.3606	62.8912	59.2136
AC710	122.093	114.954	105.955	111.49	139.078	126.653	108.883	102.899	107.072
BJE6-106	112.082	117.836	114.448	52.505	68.0695	67.2011	98.0837	92.3187	100.171
Tivantinib	66.0665	68.0356	65.8685	74.4823	72.2111	78.2899	77.4515	75.0968	61.277
RO4987655	102.974	86.1868	104.701	101.202	130.728	118.971	95.2662	82.1609	95.2987
M4205	99.0026	85.4497	88.8489	9.61924	19.7729	96.5264	77.6139	67.1557	68.1382
BMS 777607	122.291	128.462	116.725	109.953	137.007	133.801	94.8683	89.6717	82.2178
VTX-27	130.993	134.623	108.342	97.7288	152.505	133.467	92.5623	67.8621	88.2913
(±)-Taxifolin	115.581	123.501	135.14	106.279	132.465	113.627	107.917	92.4324	104.758
NVP-BAW2881	116.219	122.06	121.202	104.943	106.279	119.038	92.3918	96.5004	89.7285
SAR131675	111.587	134.392	130.322	120.174	121.91	108.417	113.933	113.251	118.026
GSK 3 Inhibitor IX	122.269	118.749	127.725	111.423	111.824	118.838	99.0743	87.9584	94.4623
BAY-826	126.427	120.41	117	124.649	126.921	111.49	91.4256	95.3312	95.4042
LDC1267	132.786	139.254	148.341	104.075	112.425	92.0508	98.912	112.301	103.824
BAY-474	134.898	135.426	140.772	97.9292	115.765	109.886	90.573	82.7212	85.7336
BRD3308	119.761	118.815	123.919	146.293	96.7268	118.637	96.7277	92.9602	89.7123
PF-06843195	136.548	151.839	141.773	111.957	108.15	85.0367	66.6035	76.4446	77.1429
Fostamatinib Disodium	93.3262	92.4132	78.4313	130.127	127.054	121.376	99.0581	96.9632	91.588
Ponatinib (hydrochloride)	96.0324	105.141	103.37	92.1176	96.9272	90.4476	62.3407	59.718	54.4889
BRD 4354	118.521	95.8637	105.672	98.0266	117.07	108.485	134.033	138.74	123.058
TCS 21311	85.2618	92.9957	85.864	86.2852	113.814	90.0345	140.584	126.512	120.03
Esculetin	119.611	100.127	117.402	94.0306	90.2812	83.8678	120.893	103.639	115.624
NSC781406	73.5126	74.6025	75.5011	62.9502	73.6556	67.6862	91.7028	86.9574	87.1903
CNX-1351	72.2794	47.2228	74.1245	80.3157	76.073	70.3009	101.873	85.754	85.4726
(E)-AG 556	115.414	108.1	112.345	85.5451	94.1786	90.7252	118.351	113.091	101.281
SF2523	74.612	74.3539	52.4426	78.145	71.2383	94.9186	66.6753	68.7229	67.112
EAI045	95.6534	91.7147	122.517	84.7065	101.727	101.825	112.674	88.3742	98.7481
SU5208	77.0689	102.087	87.6517	94.7213	75.777	92.1559	112.916	97.7195	98.4958
Pexidartinib (hydrochloride)	123.09	111.704	123.492	99.9507	95.3133	90.0839	120.631	138.361	150.414
Raf inhibitor 1	139.61	130.05	138.08	85.9891	70.8929	76.665	136.614	126.726	140.186
Almonertinib (mesylate)	114.85	129.476	83.2064	85.3478	82.4864	87.2225	123.426	130.423	128.744
HB007	109.783	110.452	111.781	95.6586	82.5358	82.8318	78.7378	86.1519	87.7531
Rociletinib	116.026	127.067	113.043	75.185	76.221	87.9625	111.81	121.068	115.517
Quinacrine (dihydrochloride)	74.9753	61.7635	72.6235	71.485	67.2916	77.109	97.3119	92.5277	101.417
GSK2292767	130.337	119.611	118.76	110.903	101.233	101.628	105.949	103.057	109.219
RGB-286638	23.0171	22.3384	22.998	23.4336	27.035	28.9591	53.1572	44.3553	51.0222
Nintedanib	95.032	98.0529	92.0111	101.036	97.2373	116.231	103.911	110.84	109.277
SNS-032	20.2141	22.6186	22.6635	27.9516	33.689	30.7099	68.2253	65.9752	59.7317
RSC133	127.601	125.403	135.739	106.786	133.431	135.914	129.089	119.47	112.73
Cryptochlorogenic acid	126.363	111.721	105.207	113.35	134.59	118.316	112.234	109.902	105.848
BPR1J-097 Hydrochloride	101.833	104.92	101.528	113.737	131.5	120.191	106.152	112.527	110.135
Tucatinib (hemiethanolate)	109.854	109.863	127.108	86.9254	131.611	98.9518	87.6246	94.1417	96.3614
CYD19	122.81	116.44	100.012	64.362	66.5687	68.9408	75.5127	75.7255	65.7421
Altiratinib	88.2585	117.947	117.75	93.3248	118.04	112.192	121.041	109.152	114.129
F-SAHA	113.461	125.968	113.946	86.0979	78.7054	59.6176	111.605	99.3108	97.9729
PFK-015	102.255	94.0993	79.8337	62.8724	58.0729	52.6113	112.406	109.923	102.868
Arnicolide D	123.384	111.218	108.733	96.8003	94.7591	100.552	145.397	141.768	136.153
Roniciclib	24.7181	28.6569	27.1047	31.4271	36.2818	34.5717	58.2621	56.7114	63.2589
Tyrphostin 25	109.154	104.57	106.005	102.096	127.418	112.523	116.957	127.71	124.68
limertinib (diTFA)	116.485	110.258	118.432	104.579	110.647	106.234	110.277	110.956	126.474
BPR1R024	110.895	103.009	110.626	119.474	115.502	109.489	113.136	106.456	123.616
mTOR inhibitor-8	37.4764	34.7579	32.0842	87.808	105.406	102.317	107.277	106.75	108.423
β-Hydroxyisovalerylshikonin	103.188	103.798	101.815	113.902	106.62	115.171	115.376	119.957	115.528
3,​5,​6,​7,​8,​3',​4'-​Heptemthoxyflavone	90.4836	93.9019	77.3484	80.6915	73.8507	73.2991	95.5809	99.6047	101.723
DBPR112	110.186	113.641	106.481	101.159	87.3667	106.399	110.034	108.757	107.622
Enzastaurin	66.2043	98.8031	92.8325	88.149	95.528	111.532	124.576	107.447	110.422
PD318088	85.144	89.1431	165.902	90.7365	94.6655	82.4471	111.657	100.532	113.181
SU5214	97.9934	86.7915	82.3066	110.909	118.336	124.134	86.1071	88.1807	91.5885
Bemcentinib	98.5003	107.794	92.7551	91.9823	107.794	101.805	118.842	93.9686	75.577
25(R,S)-Ruscogenin	93.6633	85.2637	82.046	92.6052	100.272	95.9114	100.838	98.2871	80.3372
EMI1	63.2824	49.9402	52.672	44.1624	65.1974	77.4159	46.7454	44.8161	49.0263
Capmatinib	95.17	88.6503	88.4039	82.3512	91.8864	92.3656	94.3563	85.5662	89.9387
PIK-75	18.8763	21.9038	17.8202	14.1193	21.2108	18.863	73.4674	73.8731	74.2066
AZD-7648	98.6907	104.805	100.85	92.129	95.1775	88.1355	90.5542	100.897	98.6774
PQ401	94.708	103.503	118.33	90.8899	91.2465	91.6298	80.5408	72.1508	80.9325
SR-4370	48.9306	100.679	99.0335	94.5179	93.3769	95.962	92.3196	87.5059	84.8209
Butein	99.1226	105.69	108.617	90.0342	91.9507	94.6784	91.6782	79.5985	89.4132
CGP60474	16.4862	18.1245	19.8519	24.8551	25.1671	26.7895	53.1003	46.4644	48.5761
Gartanin	75.096	100.727	150.679	96.2918	107.408	104.484	87.188	90.401	89.0726
PI4KIIIbeta-IN-9	96.2915	67.8571	95.7019	89.8202	87.5561	96.684	75.7384	86.4047	99.1485
NecroIr1	32.5747	36.626	38.3877	37.7447	42.7277	39.786	67.5812	61.4278	68.6371
(Rac)-AZD 6482	81.3066	89.7107	86.9756	83.108	88.813	87.8324	82.4481	86.0073	82.9079
Motesanib (Diphosphate)	104.038	96.0241	93.858	94.0098	91.3089	96.0689	108.765	96.2251	92.1266
Glumetinib	93.3507	82.4102	97.5117	93.5641	83.2506	99.9109	94.664	85.6781	88.4993
AEE788	83.411	104.62	97.5939	86.8162	90.7384	83.5626	99.4721	85.7121	86.4274
Vimseltinib	89.2377	109.083	100.823	98.9125	91.1662	96.9782	84.4576	88.4482	86.6998
Quercetin (dihydrate)	117.062	116.027	107.019	91.4961	94.4109	89.7757	87.7897	90.0263	101.658
RGFP966	13.422	80.0521	84.1582	79.9168	110.848	91.7902	99.6197	96.736	93.2506
SU11274	116.281	105.511	110.893	97.6556	101.667	95.2845	93.8126	95.0217	86.4501
(E)-AG 99	102.55	109.467	110.557	103.04	100.776	88.4297	98.3992	92.0131	110.15
Pinocembrin	115.897	84.9397	99.2391	89.9718	91.9418	91.0147	91.9904	93.7501	98.7228
Glesatinib (hydrochloride)	124.811	121.516	120.96	92.839	105.023	100.443	107.882	89.5421	104.245
Pimasertib	103.679	102.168	91.9384	56.4159	61.69	56.2275	99.6803	85.7434	96.2428
F-1	94.0908	104.054	99.4286	23.0958	26.5259	27.0712	99.3503	92.7617	88.4585
BMS-754807	92.0089	94.7326	97.9337	76.2731	89.4683	84.1347	97.5692	90.3392	88.116
Sorafenib (Tosylate)	114.456	99.413	125.554	95.0399	98.1726	87.7532	86.2353	93.098	80.2383
Sitravatinib	103.851	115.818	114.573	83.3317	78.355	82.5981	76.0099	84.8902	101.524
Tinostamustine	91.2184	95.6248	101.534	89.6369	104.706	91.8476	96.9341	95.3274	98.1235
Paltimatrectinib	112.593	99.5774	84.2917	97.6273	97.439	93.4735	98.248	85.4382	86.0859
MK-2461	95.7422	89.6139	101.518	106.817	104.27	105.737	90.0527	92.6869	90.9246
Roblitinib	135.158	124.553	138.351	93.3644	100.621	107.095	81.0168	75.4868	78.8683
Ki20227	120.412	115.826	129.523	107.462	89.6071	95.1092	92.4254	95.7135	90.2271
Tefinostat	126.627	92.228	107.702	96.517	92.7993	92.5614	93.2848	94.8977	93.976
NVP-ADW742	119.168	117.148	101.166	91.1338	96.6261	79.8123	86.0921	93.5339	97.2018
Sotrastaurin	136.097	104.156	75.4631	100.542	100.512	105.836	95.5578	96.9527	99.2382
Samuraciclib (hydrochloride)	34.0986	25.2779	23.1881	81.4977	73.0611	60.8672	77.9279	85.6126	79.4724
RG2833	101.151	84.8317	95.8518	117.554	92.0756	84.3132	162.895	-5.33273	102.539
Purvalanol A	102.982	100.775	99.8826	103.744	112.924	101.057	99.5994	103.896	119.278
GNF-5837	86.5928	86.5145	82.6715	107.928	95.5455	96.2295	90.3205	101.194	106.636
MC1568	132.764	108.863	124.92	110.809	97.9947	94.5335	95.8284	95.3821	96.0578
PF-04217903	111.721	135.236	118.4	94.8528	105.391	96.81	94.6507	96.4545	87.1754
SU4984	72.9797	125.18	128.448	108.924	112.138	97.5929	96.064	91.5267	92.8284
Leonurine (hydrochloride)	118.082	149.021	124.333	106.349	97.7372	96.4289	90.7395	89.2518	91.6445
Olafertinib	90.4942	131.414	121.962	105.659	87.0961	88.0026	80.8405	92.2023	82.979
Cinchonine	102.461	127.652	108.729	102.198	98.5612	105.803	96.1941	88.818	91.3655
Sophocarpine	127.878	93.5529	120.327	105.896	100.385	99.1175	96.3429	86.6857	100.322
ETP-45658	59.5799	66.636	73.097	69.3678	73.4883	68.3995	67.5076	67.551	71.2329
AG490	77.7312	60.9542	80.3626	101.538	104.186	95.1104	89.0597	100.087	94.5515
AZ-5104	80.6392	88.4159	71.1864	60.0041	64.3203	60.4883	96.2499	98.5062	102.43
KU-55933	130.342	134.657	138.37	96.4186	100.549	105.669	89.3882	92.4998	101.99
AZ 628	105	106.257	140.105	67.9566	74.5905	68.2347	92.6734	90.9254	93.5474
CAY10505	134.708	133.769	134.716	89.8465	111.293	96.3465	91.5639	93.6156	92.8903
(E/Z)-Zotiraciclib (hydrochloride)	48.5098	63.5437	40.138	32.2013	30.6253	25.4232	92.1155	85.9171	89.2271
CHIR-124	31.0959	36.0485	29.0008	13.7417	13.2473	15.1427	82.3467	81.7889	76.6689
PD173074	94.2736	119.28	120.093	109.419	101.724	96.5628	96.659	81.2806	91.4957
Ebvaciclib	83.4716	66.4767	75.7368	67.3797	67.081	69.7799	80.4934	85.4212	86.1712
OTS964 (hydrochloride)	25.1544	20.1347	23.4197	27.3701	27.3701	26.9066	85.5142	102.746	104.054
PLX-4720	68.0221	72.7671	58.955	87.9177	98.4358	94.2857	98.7807	82.9704	99.7164
Purmorphamine	72.9081	74.0669	70.1049	93.9335	93.448	97.8932	91.5743	94.4301	99.1878
Salubrinal	56.7469	82.6486	72.9864	93.6765	104.128	93.5242	89.4477	90.0553	103.156
BML-210	73.6754	78.7493	72.8454	102.614	95.5897	96.7605	90.6264	93.5977	103.915
LY2109761	74.8969	77.0423	78.8433	89.6786	109.734	102.034	92.8868	103.162	90.2801
PD98059	70.5434	63.7313	55.6664	83.6057	92.8959	100.758	86.7134	98.325	86.2212
Vps34-PIK-III	72.1094	76.0558	69.2123	89.4692	99.5971	101.777	87.2177	96.7816	89.2532
GW806742X (hydrochloride)	59.6284	67.3488	66.1116	73.9918	76.3525	85.795	93.1845	95.4327	104.978
GSK1838705A	73.5815	62.7447	62.1183	93.2957	94.695	100.901	90.274	94.9952	105.714
A66	75.586	75.8992	72.4853	94.2857	99.6447	86.0425	95.1775	109.347	100.373
Izorlisib	49.0108	56.5903	56.5746	78.0563	71.7264	69.8036	78.468	81.3056	79.8837
WZ-3146	57.6395	57.0131	62.4158	64.9872	65.7772	53.679	98.6531	82.3871	89.5813
PI-3065	71.4047	67.8812	74.3958	77.3614	96.8176	87.2133	85.3948	92.7835	86.9625
2,5-Dihydroxybenzoic acid	67.2078	81.1766	79.2504	94.3904	97.76	95.1804	104.93	105.313	102.268
SU14813 (maleate)	69.8544	81.9596	68.6486	109.22	105.251	88.7743	108.515	106.741	101.314
MRT67307	62.5568	56.8409	60.427	93.4575	97.1127	96.5225	102.621	83.1709	80.6068
SU9516	79.8298	80.8477	75.1788	95.5421	99.8065	93.6193	110.733	111.055	105.689
TG101209	65.7828	66.5344	79.2348	62.2077	60.6466	55.7826	90.4685	91.9693	96.575
Go6976	90.9749	111.354	109.516	113.471	116.257	104.941	109.387	111.996	110.024
Pexmetinib	74.1988	96.4891	90.2163	106.253	107.546	105.894	101.679	107.102	104.966
NVP-AEW541	92.813	95.9056	105.096	96.1573	100.692	95.3196	114.22	109.865	108.514
SAR405	120.063	113.455	109.764	99.229	121.271	121.909	118.364	119.668	116.782
TAK-632	105.796	103.929	106.073	88.1382	95.6535	89.9836	89.9913	83.4335	89.0156
CP-724714	97.4811	121.274	98.3126	117.477	103.824	112.554	104.945	104.971	94.5103
AT7519	21.9596	21.0551	21.5803	69.4227	54.7927	66.4967	63.7601	61.3876	55.1995
PF-5274857	89.1952	105.081	76.9122	111.983	117.671	107.084	105.048	101.736	102.008
NVP-BHG712	99.4067	96.3724	103.593	110.642	111.904	99.9029	108.073	105.978	101.895
ACY-738	110.654	110.654	115.891	94.2633	84.4048	97.8875	103.98	105.618	99.8151
Merestinib	110.056	111.952	118.254	91.8169	91.1006	95.265	107.739	108.016	105.885
SP600125	117.35	119.888	110.406	96.1573	96.3091	93.6138	112.037	105.33	89.5599
SB-590885	104.76	107.488	114.243	102.829	94.5304	107.643	98.9935	98.2078	98.5005
BS-181 (hydrochloride)	118.225	122.922	120.034	111.825	97.7721	102.459	101.114	116.125	116.818
AZD 6482	115.526	109.925	117.16	86.5355	85.8435	91.9808	92.2662	112.407	104.083
Pilaralisib analogue	115.118	109.254	113.499	102.859	94.6276	92.8368	101.915	100.293	101.058
FLT3-IN-2	118.254	95.716	108.422	90.9367	85.8617	97.1954	101.736	98.9216	107.118
TGX-221	105.125	105.3	112.463	98.5249	94.148	90.1172	109.629	100.159	104.992
1-Naphthohydroxamic acid	109.157	130.163	117.851	118.606	106.152	100.872	108.585	104.146	107.882
WRG-28	119.133	124.453	116.164	121.906	125.168	104.212	109.898	117.505	123.624
Semaxinib	119.765	114.169	115.807	122.876	119.393	107.526	113.612	119.316	118.791
PF-03814735	68.6366	78.6937	75.6441	101.113	92.494	95.0394	111.796	104.73	110.423
Alofanib	108.751	106.48	130.131	126.027	112.206	108.977	114.748	111.823	120.218
DBeQ	109.692	107.405	106.74	129.627	129.432	109.778	114.266	132.636	134.852
PD153035	123.869	115.629	102.977	98.8282	89.5059	92.8716	93.6912	108.563	97.9728
Torin 2	28.084	25.8293	24.5965	49.3588	48.9942	56.7671	63.0447	71.451	75.2514
Brivanib	92.9357	55.1407	91.1514	110.012	121.672	99.0105	111.861	116.548	113.093
JQ-1 (carboxylic acid)	120.771	120.852	125.443	116.203	102.448	105.462	111.877	94.0696	97.4754
Mirdametinib	124.113	119.441	126.903	93.1385	99.1797	94.2647	106.985	99.0323	103.714
LY3009120	113.131	107.664	122.393	97.6564	101.445	96.3935	108.639	94.6481	89.4259
LY294002	122.442	124.08	111.055	112.382	94.0499	103.515	96.1617	112.52	95.6266
AG1024	137.041	118.305	122.328	110.006	96.4976	103.366	106.114	114.137	119.229
Degrasyn	117.608	111.282	105.637	93.1775	104.01	98.6069	116.337	121.11	107.282
Fraxinellone	112.515	110.422	118.354	100.065	106.464	91.7714	96.0807	110.147	113.126
PRN1371	111.055	109.092	113.958	95.5472	97.2072	94.434	90.1395	92.0208	97.3294
Bisindolylmaleimide I	107.275	93.2115	111.087	104.524	96.6018	90.6582	91.1558	95.9942	91.0098
HG-14-10-04	101.98	107.963	93.2384	104.868	98.9764	112.551	124.633	117.043	124.273
B-Raf IN 1	61.5849	91.2099	88.9187	99.975	98.009	106.934	105.681	108.441	113.265
PQR530	33.9009	30.3838	50.0997	69.0051	71.0523	76.8381	72.2009	80.5338	77.2761
CGP52411	101.163	112.21	99.4698	97.5034	105.099	117.95	121.792	112.471	129.822
Euscaphic acid	100.039	74.8067	97.31	86.2189	124.591	107.234	119.832	125.833	135.949
LUT014	94.0118	96.9451	89.8672	108.008	132.093	124.685	116.706	126.576	140.773
Tamnorzatinib	86.4815	99.2217	82.0451	105.474	98.1026	108.388	117.649	132.343	134.955
JND3229	89.7213	92.2898	88.4225	90.1573	92.6913	89.452	86.1519	99.3027	98.554
Lirafugratinib (hydrochloride)	81.7386	84.3509	81.0673	113.369	101.592	109.481	101.68	107.721	104.189
(S)-Sunvozertinib	114.122	112.91	104.169	95.1691	78.0364	94.3578	120.838	116.351	115.225
Belvarafenib	119.434	130.116	117.259	107.758	110.23	102.197	116.414	117.283	112.048
SU14813	117.011	94.3037	109.554	111.952	109.306	97.7406	122.484	171.475	108.321
Tyrphostin AG 879	112.502	106.971	112.225	117.501	109.499	94.907	118.723	118.763	116.391
GSK1904529A	92.5671	33.3317	120.368	120.796	111.709	102.815	119.861	122.227	111.259
SU5408	94.114	109.583	110.225	103.789	90.9375	96.2177	115.214	100.029	97.7139
PI3K/mTOR Inhibitor-2	48.2318	51.5153	64.2701	72.207	52.9397	61.2283	77.9734	77.4247	82.0255
ACY-1083	85.6205	91.5017	98.2002	96.1366	94.0332	96.6983	118.186	116.82	103.029
KAN0438757	82.6726	95.3106	101.644	90.7253	85.1704	96.5859	107.636	110.505	111.225
Buparlisib	58.4726	48.926	45.9778	49.8638	55.7888	57.4356	85.2491	83.099	62.6886
WHI-P154	91.0291	98.933	93.3034	86.2927	98.8113	96.502	91.994	107.841	110.435
ALK inhibitor 1	81.4404	98.3153	101.376	91.4066	103.727	88.5277	98.005	106.988	93.5549
Avutometinib	96.3779	109.378	91.6468	89.8279	90.8866	98.477	124.008	114.787	112.565
BIX02189	105.391	86.0312	86.2839	101.381	108.185	112.779	119.847	123.723	114.11
Tacedinaline	99.6209	96.5604	94.6652	96.081	108.129	108.079	113.893	126.912	105.225
Rebastinib	96.3358	92.8261	98.0345	103.702	119.942	99.2137	110.244	107.81	103.489
Forskolin	71.9219	88.137	78.1693	125.062	110.042	97.4121	114.989	128.706	116.146
Taletrectinib	86.8454	83.111	83.813	95.1585	95.1523	87.3514	108.053	124.328	106.342
Tyrphostin A9	98.8628	103.004	107.623	92.7439	98.3965	95.4247	77.884	85.4249	79.8946
IACS-010759	88.488	106.374	105.896	98.3346	107.089	90.8804	105.298	108.9	95.4621
Chloroquine	96.4341	106.177	96.6166	104.551	110.946	99.9009	117.8	112.518	107.334
AZD-8835	76.1617	74.3928	112.593	83.581	75.2476	83.2714	106.187	98.16	103.442
GW806742X	80.5279	93.5701	90.8325	93.5054	96.18	104.204	106.993	95.86	97.1573
IACS-010759 (hydrochloride)	88.3757	166.026	98.189	90.8618	94.688	98.6317	103.044	97.6535	104.45
ATH686	82.0862	87.6457	82.3529	67.5706	69.8242	76.3744	90.0351	85.3835	86.8152
GSK2606414	87.5474	93.3455	97.6836	104.222	107.157	103.096	125.067	103.597	110.999
SGX-523	83.9674	89.8638	102.822	84.8873	93.0659	83.8101	95.1261	98.4236	97.4571
Go 6983	84.3814	95.4451	86.4349	131.514	139.016	153.046	109.5	90.7699	94.3475
Rafoxanide	84.2072	84.7299	102.962	155.692	150.293	143.896	108.239	99.7023	104.699
GW 441756	92.2965	86.0988	87.1816	140.244	128.646	129.734	103.996	106.727	93.3194
Lavendustin A	81.4444	78.8309	91.0146	128.555	154.629	141.917	110.709	112.105	92.4959
ETP-46321	59.1303	86.7584	78.7687	114.319	149.592	141.184	84.2754	88.9742	92.2168
MAX-40279	39.1809	46.9342	41.533	92.7459	85.8627	76.7043	41.5957	37.525	31.0723
AG1557	77.8104	82.6391	75.3214	118.605	124.573	120.847	90.4396	88.2531	88.4159
FGFR4-IN-1	121.729	55.5088	61.8683	158.346	138.793	118.754	114.194	103.647	108.062
TMP269	123.042	127.219	126.064	108.723	102.807	120.171	112.487	105.055	107.658
TAS-301	113.244	91.9176	83.7503	128.668	99.5614	107.854	103.185	108.518	101.946
SGI-7079	59.0446	69.8777	64.2234	99.9191	103.484	94.9487	106.408	110.824	110.377
IDH-305	98.0813	98.5058	124.01	103.535	120.031	153.712	97.9545	97.7251	100.994
Belizatinib	84.0729	75.2603	90.2705	80.2675	106.231	115.418	109.562	110.377	109.138
PI-103 (Hydrochloride)	84.2766	80.2015	74.2755	75.016	72.6266	78.4787	92.426	89.9025	109.069
WHI-P180	110.273	106.707	109.797	119.379	120.107	115.878	102.531	109.436	100.283
IPI-3063	109.662	114.603	121.7	75.4249	88.1895	104.736	105.685	117.064	129.497
PHA-665752	98.7265	99.7623	107.199	101.248	99.408	113.22	113.588	111.007	106.924
HKI-357	82.7824	86.3822	86.3822	96.6864	95.0382	95.1532	101.04	108.301	97.9316
SU1498	114.637	102.479	94.4476	114.409	99.8297	91.8694	105.261	109.998	95.282
PD 407824	83.6654	67.4156	83.7673	108.327	48.7202	131.032	88.4458	104.24	82.3093
HS-173	61.6255	56.7014	54.3751	69.9306	73.3166	73.6872	81.472	74.8079	69.3252
Taselisib	73.3756	77.8922	89.065	82.708	78.8109	73.4444	96.2914	87.6888	91.2216
c-Fms-IN-1	105.841	106.894	108.779	112.032	109.745	100.622	112.269	105.089	111.145
Bisindolylmaleimide IV	94.3627	100.662	103.056	83.7685	87.2823	88.4706	93.6188	108.404	99.9962
PIK-75 (hydrochloride)	37.9047	33.9653	28.9902	28.8769	30.0652	28.1613	27.402	26.1289	24.718
CHDI-390576	110.001	117.897	104.007	103.855	105.183	103.791	98.3216	106.339	113.99
Mavelertinib	117.571	126.211	117.037	82.7947	90.3338	91.7997	96.8968	108.204	97.6027
NKL 22	119.246	112.031	108.486	82.0063	101.901	105.116	91.2364	90.6637	95.9512
GSK3117391	58.9252	70.2375	69.4537	83.0534	78.902	83.9157	67.7292	62.3485	57.7003
NBI-31772 (hydrate)	124.448	114.275	127.708	102.85	80.873	96.6164	98.7081	87.1476	106.686
TASP0415914	81.6924	120.297	113.011	80.8114	94.6084	95.3968	112.666	94.6326	93.8602
CG347B	125.98	100.006	121.241	92.7729	88.3874	97.8483	98.5483	97.2963	117.461
Citarinostat	76.8468	77.399	82.3159	74.6396	79.3454	90.3708	78.1176	80.7281	80.9145
SKI V	113.866	108.717	109.145	87.5621	103.613	88.3505	93.2075	100.906	111.134
PF-04217903 (mesylate)	111.853	112.138	103.533	104.217	80.873	94.3867	105.967	102.291	100.759
EGFR-IN-11	90.9916	102.375	104.923	75.465	89.0773	94.9164	86.8413	82.2997	98.2952
CPL304110	67.9929	61.0986	69.7921	62.9614	63.8976	53.7716	76.7192	65.6914	71.5116
PP58	76.2767	75.7779	61.8468	79.6164	64.7476	66.2136	81.2209	83.8846	75.121
PI-828	90.8313	93.7529	98.1531	83.7063	86.0222	88.6092	95.9911	95.6182	96.0044
Duvelisib (R enantiomer)	125.267	117.927	100.54	91.0237	96.8381	84.7041	103.769	99.5339	105.554
Agerafenib	112.102	100.612	108.112	103.921	98.7722	86.8599	118.313	100.559	105.66
Protein kinase inhibitor H-7	102.286	98.9904	107.72	102.911	87.2787	92.1939	100.533	106.02	116.608
FGFR2-IN-2	113.492	111.479	98.3669	122.215	130.567	87.7592	56.8213	67.9023	66.1842
MHY-1685	104.851	119.727	114.115	90.4324	83.5461	91.9106	100.08	112.413	95.9512
AV-412	75.1116		70.1011	107.88	107.087	93.3616	75.1539	96.2303	102.622
Tubacin	93.0803	98.2636	87.8279	94.0982	90.2738	117.172	102.197	93.7851	104.483
IC-87114	113.727		107.421	84.8064	105.09	99.254	92.5094	114.742	97.3333
TCS 359	89.0892	95.4128	85.9619	125.132	110.515	107.483	103.632	102.383	91.7918
SBP-7455	62.6026		67.3366	62.6392	78.3758	80.7271	90.6755	83.1805	85.0808
VEGFR-IN-1	106.298	103.274	110.513	90.118	113.744	123.914	103.486	106.862	128.403
Tuspetinib	97.417	98.3673	98.0563	115.203	107.809	116.449	95.5526	113.506	99.805
FIPI	92.8384	100.838	106.712	106.124	139.098	112.724	97.6124	102.317	105.174
CCT196969	98.9374		99.784	105.812	104.254	110.529	98.3034	97.6124
CEP-28122 (mesylate salt)	88.6227		86.8431	98.2625	102.342	108.121	92.3233	86.4097	101.533
E-64	87.7934	94.7735	98.9374	96.322	81.3361	100.09	100.004	96.9612	93.32
(E/Z)-Zotiraciclib	36.0641	33.0751	34.4919	34.3673	31.5061	36.1945	25.0276	21.7585	24.5891
PF-6274484	92.0609	98.7301	98.2636	107.214	110.189	87.9367	101.081	90.8615	108.323
AG-1478	82.8865	78.0833		82.6392	96.3361	110.245	100.376	101.572	103.672
SSR128129E	110.617	111.429		115.415	115.486	109.679	96.8283	104.443	109.426
MHY1485	95.7065	92.8384	94.1861	108.602	110.274	90.6704	106.835	103.393	105.599
Remetinostat	105.054		111.308	137.271	116.223	103.631	94.8482	101.546	100.921
Tyrphostin AG1296	107.576	100.112	99.6458	102.214	193.999	91.761	100.124	101.719	104.27
LDC000067	118.595	124.247		85.4973	97.7206	98.62	87.9535	98.6605	93.525
Oxamflatin	38.6453	39.7795	33.7434	116.793	88.0919	100.603	85.1201	88.0761	91.9312
BLU9931	88.4146	98.3339	91.202	87.4692	101.376	80.8387	102.039	117.922	110.403
