# Supplementary material
Source: Research Square preprint supplement (doi:10.21203/rs.3.rs-9564432/v1)
Supplement: Supplementary file 3 [file 6acf5e51426de49d482a3adc.xlsx]

## Sheet: Sheet1
Compound Name Cell Line	U251	U251	U251	LN229	LN229	LN229	A172	A172	A172
UniPR129	111.809	117.288	112.559	106.646	94.6648	97.4554	109.858	112.514	100.336
BMS-202	117.98	98.8529	105.216	90.894	88.6569	88.9568	94.7919	110.594	110.457
Zoligratinib	130.149	96.5461	110.349	76.0878	96.8557	87.746	71.0485	78.6633	75.0262
HA-100	109.829	113.963	112.021	109.356	98.8276	106.346	114.231	106.466	122.663
RAF709	109.234	127.688	92.0286	71.4176	89.5679	134.875	99.7503	135.018	125.101
JK-P3	105.812	94.1432	103.044	74.6694	93.6385	86.3507	120.034	111.111	90.46
Bisindolylmaleimide VIII (acetate)	104.082	96.3731	94.0471	69.1228	84.4941	91.9664	95.5547	102.189	95.4866
BMS-265246	70.7484	78.1109	72.9975	77.1717	83.7561	81.0808	80.2843	90.46	80.4478
PDGFRα kinase inhibitor 1	97.8533	107.561	94.2009	77.5176	84.4941	84.7017	101.726	95.0234	93.0618
AZD2932	110.368	101.448	92.3939	81.7381	87.0195	83.2718	104.123	108.251	91.686
PD 174265	104.812	116	97.4496	64.4872	65.9747	72.859	185.12	103.074	108.932
ON-013100	32.3401	37.9917	39.9333	24.4272	21.9595	25.5688	32.0756	26.0682	27.9209
ODM-203	94.7968	105.696	100.352	89.4295	82.9259	87.7806	92.8848	105.799	96.0587
Rheb inhibitor NR1	119.422	125.573	121.325	75.615	96.8673	86.1892	106.343	111.615	105.799
M344	60.3485	52.6784	53.332	86.3045	66.3322	65.2829	33.9282	32.675	29.4193
NVP-QAV-572	127.456	110.807	122.859	119.553	116.029	145.859	90.4104	110.028	104.958
CE-245677	84.01	88.4242	100.531	127.492	97.5698	103.216	117.308	151.148	112.414
Uplarafenib	108.718	111.026	86.9589	113.16	123.116	134.632	115.871	111.641	111.424
RG13022	101.74	110.916	112.84	114.208	92.0544	118.072	99.1821	126.622	130.134
OSI-930	101.3	104.011	112.583	100.177	114.889	87.3775	103.412	123.165	107.344
GSK2656157	46.4436	47.6891	70.4195	54.2326	70.8444	94.2815	65.5731	117.674	136.791
Ningetinib Tosylate	122.053	116.961	115.917	97.1244	112.95	118.033	109.377	115.248	104.429
CRA-026440 (hydrochloride)	60.1624	73.8995	59.8511	106.164	101.421	94.6222	81.6523	79.1983	84.4858
Isosorbide mononitrate	123.186	116.364	90.9895	88.1963	86.055	97.5987	99.931	112.363	116.18
Binimetinib	93.8536	85.2293	84.1673	73.683	76.4588	76.3354	93.1402	102.353	98.2908
TWS119	90.716	84.103	94.6903	88.9454	104.225	94.4529	98.5667	118.203	120.212
Salvigenin	106.34	106.661	69.5575	91.8886	83.4026	97.9953	106.599	106.998	113.911
MGCD-265 analog	109.316	108.721	113.178	90.2936	98.4006	98.7531	108.822	112.762	119.384
Tepotinib	92.7273	108.109	109.944	92.1265	92.5847	102.445	116.272	133.947	128.689
Lirafugratinib	90.9574	96.6372	104.377	97.3256	88.2933	103	105.388	114.984	107.826
Cenisertib	62.1239	57.5865	60.9976	54.1732	64.2101	56.3939	39.0588	51.6747	39.7026
Lucanthone	122.43	104.071	88.5278	96.5854	97.2815	84.3896	102.568	116.165	106.124
Zipalertinib	112.019	103.282	104.264	86.4427	90.3465	92.4437	105.358	103.717	105.511
Liensinine (Diperchlorate)	118.005	112.808	106.742	93.3954	87.0596	90.7166	108.117	105.404	100.176
Larotrectinib sulfate	101.722	99.7908	111.118	95.7042	104.781	86.8217	106.308	111.213	91.8219
Erlotinib (Hydrochloride)	105.101	112.405	86.7418	96.929	86.2929	95.5455	115.245	99.5018	99.8237
Avapritinib	88.753	91.1826	85.6154	90.8752	98.2773	98.2508	109.129	111.443	93.876
Gnetol	113.773	106.999	103.701	74.0443	83.9754	89.0775	106.415	98.6434	100.084
ZM 449829	106.726	112.743	102.22	100.313	98.7443	98.9998	125.515	110.064	104.668
PDGFR Tyrosine Kinase Inhibitor III	99.8713	110.33	97.3773	99.8105	101.406	93.5981	103.993	101.97	106.691
AAL993	101.319	89.2357	90.4747	97.1493	107.345	88.963	106.369	93.8147	97.9689
Higenamine	118.966	124.371	125.606	97.8897	117.575	106.484	113.25	123.458	120.061
Givinostat (hydrochloride)	39.0527	41.1983	45.1656	45.2459	52.0513	43.5663	51.8013	60.8604
Pamufetinib (mesylate)	101.194	113.805	107.51	92.5239	102.961	101.685	99.2618	128.088	117.413
AG-13958	97.9961	100.425	95.0611	92.0549	89.372	100.9	109.104	124.158	113.35
Khellin	101.457	103.583	94.1299	102.579	109.112	146.771	106.639	118.096	110.702
Clotrimazole	104.028	106.558	107.894	101.238	124.544	125.842	111.285	113.417	117.08
Ruserontinib	91.539	81.9243	75.4065	89.7755	89.5792	87.2562	109.07	111.352	95.3317
Midostaurin	53.91	54.0112	53.2015	59.9037	70.5808	61.3324	70.7522	79.3284	88.5707
Narazaciclib	82.5113	74.7183	66.8443	81.0506	96.9845	94.3561	93.6331	102.526	102.776
Vandetanib	97.7734	96.8423	101.134	94.7596	98.5549	106.822	81.1602	86.2393	88.7039
FGFR2-IN-1	58.8894	57.0879	49.8212	51.6914	49.5102	59.8819	91.9179	89.6698	73.8996
MAX-40279 (hemiadipate)	69.7793	63.5247	69.0102	35.8884	36.9027	38.1678	28.2876	25.1735	17.7963
Dantrolene (sodium hemiheptahydrate)	97.9758	94.7372	92.4904	96.8754	110.563	111.904	109.77	110.153	102.009
EGFR-IN-17	83.5841	97.9354	105.404	111.882	95.5994	97.388	121.36	120.078	103.059
Mocetinostat	72.2893	71.9857	62.6746	82.0867	76.4701	77.7352	56.1144	53.2335	49.5865
SU 5402	90.0614	101.559	107.166	117.946	104.412	111.424	110.869	119.611	100.86
Crotonoside	92.8142	93.6441	109.392	98.8167	113.126	96.0574	122.909	122.492	114.699
RET-IN-3	92.5916	111.295	107.651	109.156	99.3947	100.573	114.049	100.611	87.0386
Chloropyramine hydrochloride	96.7391	94.576	83.5988	93.7496	93.9845	99.9858	88.488	96.2162	101.651
Seralutinib	91.6864	94.35	88.8614	95.7892	85.5913	92.4682	89.0842	100.447	94.5536
Derazantinib	96.723	90.2497	101.969	95.4902	117.968	90.0655	97.5921	105.699	111.432
Clarithromycin	99.661	102.115	86.4722	92.8206	81.5441	101.139	100.665	114.31	97.0303
Nimbolide	50.3606	47.3903	44.0487	30.1595	85.7301	92.4361	95.7461	101.628	94.6912
Wu-5	96.9974	82.5657	91.299	90.2364	98.6617	125.379	92.6387	96.6634	101.089
Chloroquine (dihydrochloride)	80.9514		122.132	100.039	116.89	132.47	98.9451	114.608	95.0581
CT52923	80.9998	90.0721		101.748	96.3872	109.586	92.1572	100.149	97.6494
Pebezertinib	91.864	86.2624	93.2684	96.7396	101.822	104.962	90.678	97.7068	99.8853
Apitolisib	43.2092	42.16	43.5482	41.8844	32.7863	52.9259	52.1059	51.2804	51.223
Imatinib (Mesylate)	88.0704	82.8401	90.5887	101.94	91.1227	98.7257	99.3579		108.462
Oxybenzone	116.078	98.0951	84.1154	103.542	94.4544	96.1309	87.651	102.958	86.4241
JNJ-38877605	90.9923	90.2981	75.7372	91.7848	102.485	85.4097	104.632	91.7329	90.2538
Dacinostat	30.2303	31.9899	36.8005	31.0458	23.1971	26.7744	33.2441	27.9124	24.7936
Afatinib impurity 11	91.1698	83.6149	83.7602	91.1761	87.5134	95.33	97.4889	99.0598	91.3545
Esmolol (hydrochloride)	90.1205	100.5	94.7697	104.983	115.181	115.512	102.752	99.4611	95.1154
TAK-593	194.226	80.9352	85.3422	96.2697	113.035	110.953	104.713	101.674	95.6199
Pacritinib	74.8655	69.0056	86.5691	72.4888	79.5045	62.2589	108.347	103.004	102.614
Fruquintinib	106.402	116.517	110.799	81.7113	112.425	99.1086	96.1274	109.142	106.674
Sulfatinib	107.762	117.443	108.275	118.243	112.977	112.867	98.1064	115.94	105.638
Enasidenib (mesylate)	129.116	102.498	102.024	97.4544	109.916	119.814	104.788	98.0132	92.0414
BATCP	131.541	120.953	136.865	127.727	115.486	100.018	99.9689	101.215	98.3392
Meprednisone	133.533	132.646	121.367	94.3113	106.994	124.502	98.5138	113.705	102.972
Varlitinib	122.728	105.12	99.6977	100.432	112.977	92.5467	98.118	92.6002	102.6
Gilteritinib hemifumarate	94.1374	103.602	103.838	95.3038	112.232	112.37	91.8784	107.082	109.875
Mobocertinib (succinate)	121.308	108.551	116.793	78.5958	110.799	74.0742	107.99	111.074	95.1961
Zabadinostat	122.649	101.985	120.598	88.7695	111.653	76.6107	104.66	118.35	102.053
Ammonium chloride, AR, 99.5%	125.33	118.35	112.553	101.121	95.9931	93.6771	101.249	99.8758	102.623
Almonertinib (hydrochloride)	121.683	115.59	116.931	86.04	85.4886	77.7411	91.5991	100.085	98.3625
Albendazole	55.7082	59.2968	54.5843	82.4557	82.2903	91.499	91.1451	89.5619	95.8014
Flupentixol (dihydrochloride)	121.663	103.582	121.269	111.764	114.466	103.52	103.81	112.762	103.368
Zanzalintinib	110.365	133.848	120.835	112.674	94.2286	104.513	95.72	91.3895	87.3617
EGFR-IN-9	144.397	130.753	108.176	96.6824	77.7687	81.1323	104.299	108.851	90.4117
Imipramine (hydrochloride)	117.029	128.209		131.56	108.621	112.977	107.105	95.557	99.6546
c-Fms-IN-3	127.065	119.494	112.001	122.406	111.874	109.696	105.161	121.505	99.5149
Danthron	123.556	99.6386	110.523	117.443	131.367	108.372	104.032	97.9434	95.2776
Mefloquine (hydrochloride)	83.1169	93.3366	86.5775	91.1497	87.7419	99.4171	70.183	92.8279	99.4453
Mollugin	106.811	90.7301	97.2389	81.8747	106.233	93.4314	85.8992	100.954	104.866
Gamabufotalin	20.6798	24.9208	23.6102	10.401	13.0087	7.61556	37.3297	40.0448	40.9984
Quizartinib (dihydrochloride)	80.3043	98.2108	77.7273	65.636	94.7056	88.6013	100.263	101.713	99.4842
Simotinib	93.3219	95.192	92.3942	91.0311	116.634	82.5562	92.2733	107.367	106.51
FLT3-IN-16	75.7835	96.0461	115.366	91.2386	112.248	101.432	92.1954	72.8396	91.378
Protein Kinase C (19-36)	101.671	104.631	111.479	98.8541	111.833	102.38	104.301	101.898	112.476
Chiauranib	80.5399	96.3996	105.898	99.9209	110.114	113.433	88.8867	100.487	105.81
Cobimetinib (racemate)	83.3097	78.4316	86.4517	87.3295	86.1297	77.4859	100.291	97.4648	93.233
Ivosidenib	108.291	100.65	88.483	108.844	89.8654	113.806	85.4801	102.971	106.933
Idelalisib	96.482	106.927	82.8599	106.117	98.8638	91.8287	98.8536	99.0905	95.7982
Flavopiridol	44.8753	45.2056	40.6087	33.7212	48.9366	47.5732	60.9226	64.8031	60.9144
Crizotinib (hydrochloride)	89.8607	77.6092	80.3927	96.4642	107.044	103.036	94.0581	106.778	86.6238
Voxtalisib	78.4738	71.241	73.3215	79.6945	73.7502	86.7842	85.2922	85.4638	74.8434
Allitinib tosylate	76.9415	76.6884	75.4513	90.8743	86.4842	79.0129	97.4157	100.005	100.332
Torkinib	79.6054	69.7368	79.1696	107.235	93.6556	76.995	101.46	108.796	86.7137
Almonertinib	78.0801	81.3416	80.238	78.7947	94.7463	105.326	106.337	101.329	106.786
N-deacetylated BMS-202	87.752	91.5828	100.678	95.428	103.854	95.019	106.002	102.497	111.598
Temozolomide acid	89.6006	93.1643	89.4109	109.416	86.566	85.039	97.8406	94.1153	96.5579
UNC2541	88.2932	69.2939	89.207	80.758	87.7658	92.5376	86.5993	86.3461	83.3642
PKI-179	35.6744	32.3145	41.8528	82.1214	76.2861	83.6211	63.4633	66.3226	73.6997
Samotolisib	34.5427	40.208	37.762	54.7173	49.3183	53.6539	47.2469	47.7534	57.3525
Thiabendazole	92.2857	100.826	92.3419	117.16	105.49	104.645	83.5439	99.9728	87.065
Abemaciclib (methanesulfonate)	72.0493	65.2804	62.5953	73.3139	87.9567	82.3668	71.9678	69.9826	68.847
Olutasidenib	91.7585	107.813	103.11	121.141	120.46	121.932	95.6348	96.9828	99.9728
Tomivosertib	88.2089	115.277	103.096	106.09	109.144	108.653	99.3029	97.7915	96.5334
PF-06459988	117.571	126.211	117.037	73.2265	83.5598	61.329	114.007	126.249	125.235
GW406108X	119.246	112.031	108.486	93.1943	94.2925	79.2834	106.3	118.394	108.329
PI3Kδ-IN-5	58.9252	70.2375	69.4537	83.3934	86.9377	65.5555	103.508	104.254	108.511
AG 555	124.448	114.275	127.708	73.2598	82.5282	83.8094	113.643	94.908	99.7024
9-Hydroxyoctadecanoic acid	81.6924	120.297	113.011	88.2523	90.9646	72.278	94.7346	110.47	109.222
Dacomitinib	125.98	100.006	121.241	71.0633	56.2871	75.0069	105.962	92.3591	88.3016
Pelitinib	76.8468	77.399	82.3159	65.3059	74.6575	75.2732	111.597	99.4596	104.349
O-Desmethyl gefitinib	113.866	108.717	109.145	79.1835	85.2072	77.3365	103.985	97.4829	94.041
Tesevatinib	111.853	112.138	103.533	74.4079	72.3612	73.9254	87.5213	96.5552	87.3653
Dihydromyricetin	90.9916	102.375	104.923	87.4369	105.175	79.5663	105.294	105.737	113.47
Savolitinib	67.9929	61.0986	69.7921	82.6946	85.8894	76.5877	108.277	104.731	104.289
Rogaratinib	76.2767	75.7779	61.8468	70.6639	80.4815	71.3795	93.0006	90.2523	98.0378
Seratrodast	90.8313	93.7529	98.1531	80.3483	87.57	79.949	96.9194	102.312	109.612
Trimebutine (maleate)	125.267	117.927	100.54	79.9157	73.4761	88.3022	115.629	111.892	101.714
Nemiralisib	112.102	100.612	108.112	84.3253	85.3569	82.628	97.5696	106.933	96.7113
Oleanonic acid	102.286	98.9904	107.72	96.8717	99.9002	99.3843	105.962	108.979	98.9568
Sunitinib (Malate)	113.492	111.479	98.3669	69.0499	87.9527	89.0177	96.5899	98.8267	88.3103
Golvatinib	104.851	119.727	114.115	85.9892	86.5384	79.9989	107.947	84.9464	96.3905
Pazopanib (Hydrochloride)	107.781	100.507		121.643	120.335	99.8076	115.871	118.229	115.303
Enasidenib	109.557	105.868	88.319	107.272	105.175	109.08	84.9292	78.756	89.1351
Everolimus	79.455	68.1685	58.8571	96.3447	94.9211	99.4036	77.077	84.5985	74.4483
Axitinib	113.555	106.095	96.0612	105.945	122.797	121.874	109.291	104.415	111.572
Masitinib (mesylate)		89.1655	79.8335	107.522	120.508	117.776	93.2985	99.0053	96.9787
WYE-687	78.8425	78.7323	71.1415	98.0569	98.5571	110.408	77.73	75.9492	65.4006
Sapitinib	100.899	92.7785	82.8753	90.9965	100.75	93.94	113.132	111.191	97.5977
AZD3147	26.7388	34.2471	36.7315	46.8834	62.9088	65.6791	63.9845	66.4605	56.1917
Sunitinib	80.6593	79.9918	89.2687	80.858	104.482	96.7103	108.401	97.4536	108.257
Sorafenib	93.7282	93.4667	89.0278	103.771	109.273	121.951	97.7249	101.422	107.46
Icotinib (Hydrochloride)	104.822	97.2518	89.1448	125.683	113.813	112.697	95.7237	101.888	99.1241
Cobimetinib (hemifumarate)	78.168	71.8641	73.2061	66.2755	75.9523	80.1077	99.7685	109.859	97.708
Tarloxotinib (bromide)		77.239	85.8965	87.6299	90.4579	89.7461	103.737	99.548	104.11
Lenvatinib (mesylate)	85.0844	78.464	78.6566	96.6526	108.272	112.639	109.529	105.891	95.181
Isorhamnetin	101.45	98.6901	94.6711	112.255		113.082	97.3094	99.4124	101.905
Multi-kinase inhibitor 1	97.4789	88.7732	101.312	96.9796		87.072	99.5396	112.115	107.934
Larotinib (mesylate hydrate)	79.6064	78.7943	95.0702	99.1728		80.531	110.385	100.684	79.8329
Marein	99.0342	91.003	88.3052	134.013	121.047	117.487	97.8436	101.464	110.139
Zorifertinib	116.284	103.291	101.085	66.8828		74.2318	104.661	104.259	99.4537
Myristicin	104.611	111.919	102.54	73.2781	107.125	91.6973	114.917	125.426	120.05
(Z)-Orantinib	115.262	116.812	95.5629	113.239	96.0544	92.3331	100.212	119.451	109.766
Linsitinib	95.8945	93.8643	79.5786	82.9271	84.8719	74.7554	104.502	132.329	109.635
Methylprednisolone	104.164	100.943	92.7951	66.2283	92.2396	94.5023	109.12	108.96	107.883
Zederone	111.31	90.7987	105.66	85.1711	104.32	83.6377	108.979	109.017	112.96
BRAF inhibitor	81.2704	83.0231	82.3261	58.2622	90.033	108.845	103.987	113.606	116.032
Rottlerin	94.0132	85.7842	89.7498	100.43	116.456	114.773	107.715	103.453	116.538
PI3K/mTOR Inhibitor-4	84.5999	110.864	96.8825	67.1259	88.5371	71.0902	81.5173	92.5039	95.5854
Palbociclib (isethionate)	71.4917	68.3449	77.501	77.018	85.9939	87.2655	95.1639	90.921	96.3066
Megestrol acetate	92.4026	93.4853	83.7066	91.2859	91.0802	97.1015	125.005	97.5523	108.492
GW284543	89.1137	75.3964	98.2833	92.3518	89.5094	84.7784	98.5639	107.743	102.751
Daurisoline	87.6317	97.1803	95.7118	99.813	89.6777	101.178	109.063	100.831	113.325
7-Methoxy-1-tetralone	115.019	90.8529	104.286	83.6938	93.3616	96.3349	103.359	112.482	99.4443
MKC-1	71.397	60.8603	70.0977	89.5468	58.2809	61.6468	109.438	93.6466	94.8361
Milciclib	53.5449	57.8354	48.7334	66.434	59.9265	70.6788	76.0381	72.4883	74.961
Buparlisib (Hydrochloride)	71.018	66.0847	71.2481	77.8221	78.3831	68.6779	86.7999	87.5305	65.651
Azenosertib	45.7693	45.6069	48.6454	58.9167	57.3085	52.2596	80.6369	79.7284	82.2479
Bakkenolide A	118.528	102.087	95.6336	114.198	128.723	96.4052	112.399	111.089	106.535
Lucitanib	99.0904	107.361	93.3112	106.036	103.589	100.198	94.7766	106.945	100.712
Capmatinib (dihydrochloride hydrate)	97.0439	95.7409	96.814	104.463	120.036	94.937	85.5801	93.9975	98.5034
Osimertinib (mesylate)	107.368	88.7123	82.0822	94.9195	105.389	101.824	105.7	113.82	113.17
Ribociclib hydrochloride	79.6448	86.0833	79.8748	96.1605	94.9545	94.5001	87.8129	95.2585	96.9452
Tandutinib (hydrochloride)	103.789	98.209	89.1568	90.3227	105.581	96.3528	180.011	178.702	192.148
Linperlisib	106.556	104.839	81.4921	104.742	84.1703	101.194	88.5599	99.7162	100.391
Resminostat (hydrochloride)	74.4328	68.117	72.6392	89.6236	119.477	98.9046	100.736	126.31	123.619
2-D08	71.3124	80.5962	95.4264	99.9627	88.9152	105.331	112.84	119.895	106.32
Tivozanib (hydrochloride hydrate)	62.6429	66.8241	74.7426	88.0638	80.6491	85.1421	124.115	117.218	115.029
Seletalisib	69.8447	84.3165	94.2659	93.4441	83.7649	93.5756	100.1	103.942	112.698
Epitinib (succinate)	81.1935	85.221	55.6118	85.9637	79.1583	78.4772	112.698	114.604	105.438
Nintedanib esylate	70.6297	77.4902	86.1255	98.1433	86.588	93.0229	119.785	115.659	124.478
BMS-690514	66.5851	78.0363	73.0531	77.1956	73.2015	76.2725	134.588	137.879	129.722
BMS-599626 (Hydrochloride)	68.4965	76.142	74.6573	88.5717	82.2653	89.1482	114.052	113.863	103.989
AZ-23	69.4693	76.1761	73.8893	95.5443	86.4924	98.1881	110.903	117.202	112.037
CC-115 (hydrochloride)	24.6886	29.6889	29.1598	41.4274	42.0876		56.0052	59.5643	57.7847
Merestinib dihydrochloride	90.5285	90.9893	92.9006	92.524	86.842	80.9209	103.848	116.226	114.556
Umbralisib	70.4932	89.1973	91.8425	92.4344	94.6122	81.0733	106.415	111.391	118.714
Methyl Eugenol	72.9507	86.8252	94.7267	93.2171	90.0026	83.4393	112.273	106.793	103.942
Darovasertib	86.1596	95.2386	96.4332	87.4066	86.7852	78.77	119.974	108.808	118.966
GW 5074	83.4974	86.518	88.7366	93.8773	89.0317	86.0951	112.415	113.092	120.084
EGFR/HER2-IN-9	82.7806	65.6124	88.4806	76.7535	71.3702	68.0034	91.2178	91.3123	95.58
Neladalkib	73.0019	72.2681	85.221	95.3142	100.016	83.1256	111.218	103.722	119.863
Palbociclib (hydrochloride)	72.78	73.1043	79.8623	79.2121	85.9637	78.5071	82.2257	84.4776	74.7139
RTC-5	74.3842	75.8519	86.5521	99.8551	107.088	86.4745	109.045	117.045	100.777
CEP-37440	60.0523	93.6433	76.7861	80.5316	81.0596	85.7368	101.567	94.9888	95.3677
GSK-F1	77.6325	87.6304	83.6982	108.972	89.4446	115.106	120.975	118.702	107.801
Lidocaine (hydrochloride)	70.2266	79.3253	78.1967	93.208	87.0242	94.3565	110.487	99.2079	98.0713
Tovorafenib	61.0222	80.4538	78.9726		90.6641	89.1884	111.211	88.6172	87.0329
p53-MDM2-IN-4	49.208	92.4266	73.5416	89.4631	87.2094	89.5434	109.816	114.035	112.399
Cyasterone	70.1384	73.1713	87.7538	98.1198	89.5033	102.556	109.833	107.956	108.438
Pamufetinib	81.5823	90.4341	84.6328	93.1833	86.6506	101.59	104.167	114.465	106.509
NPS-1034	83.3809	94.7542	79.5721	80.9145	78.9139	77.2375	107.646	106.992	102.583
WYE-132	20.0782	21.8944	20.3427	38.5879	37.0134	38.8843	49.337	54.176	43.6542
4SC-203	93.1143	87.8244	91.1747	99.4258	93.1555	86.6352	94.9716	106.647	88.2556
Nazartinib	91.2452	90.8044	93.1143	79.306	76.5336	69.7138	83.4166	115.257	101.55
Mitoxantrone	13.889	14.5767	20.9246	27.3965	24.3926	22.9848	35.4572	43.8436	39.4352
Pilaralisib	84.2096	79.9248	88.2652	87.1261	87.7188	77.0152	52.0234	56.1736	65.2488
Emavusertib	78.6376	81.2649	91.5273	95.0881	86.666	85.0761	96.9347	100.723	105.201
BMS-1166	77.5267	87.4894	84.4917	87.7559	84.8785	82.7143	108.335	105.028	87.1018
PI3Kδ-IN-15	86.1316	79.3782	89.7993	84.9773	89.5619	56.6577	93.3012	94.4894	93.6284
HFY-4A	75.2168	82.605	81.6352	46.3771	52.3479	50.619	96.642	91.4241	99.9656
Dactolisib (Tosylate)	23.8517	21.6299	25.7737	33.5464	34.1484	32.5986	48.8548	53.7971	50.6113
Rigosertib (sodium)	27.1207	30.8071	26.447	35.6891	42.4335	39.2243	50.0775	47.0521	46.4613
Naphazoline (hydrochloride)	90.4066	75.081	95.59	98.168	98.7362	92.3132	111.803	94.7069	129.096
Poziotinib	71.114	73.977	83.2023	75.4755	83.7197	85.6899	104.804	120.36	108.259
AST5902 (trimesylate)	73.0414	81.9485	92.989	77.3199	69.4065		116.601	128.112	121.094
AMG319	76.8961	88.9658	97.087	88.8665	88.2097	89.8586	113.2	103.801	107.865
Encorafenib	61.6828	59.5309	88.4231	72.2616	70.3427	77.455	113.414	112.573	101.904
Picropodophyllin	26.0915	25.3243	25.1933	35.6751	52.1635	45.8663	60.9977	67.872	67.5498
Belinostat	50.7547	60.5975	53.5803	41.7721	49.6297	45.4657	88.119	99.1287	93.2211
Oroxin B	70.2158	80.8071	79.9276	96.915	92.3132	95.8857	97.3922	119.913	112.09
PI3Kα-IN-4	58.5017	73.453	75.9792	83.8641	82.2059	83.403	107.811	98.6275	93.3464
Dovitinib (lactate)	81.3123	90.6873	89.0593	76.5933	79.2436	71.1112	113.665	99.1645	112.269
Syringin	78.2809	84.8116	90.2569	99.9519	101.787	94.0086	110.693	122.706	101.635
Cabozantinib (S-malate)	85.0548	91.8101	94.2427	90.9904	95.7599	87.5763	103.676	92.8451	105.215
(E/Z)-AG490	85.0923	77.6821	78.1873	91.2745	92.9746	96.221	118.982	122.294	116.476
Lorlatinib	73.4156	76.3348	78.8984	105.499	88.9736	89.3509	104.965	110.461	100.615
Bufexamac	81.6866	77.8879	81.6866	97.2178	94.6607	98.6664	113.218	115.688	100.185
P-2281	76.7464	64.7517	79.1791	96.7148	98.8759	89.09	90.321	105.484	102.047
Ki8751	68.7188	78.0002	68.5129	94.2881	94.5955	93.1795	85.8276	98.8065	88.495
Neratinib (maleate)	56.9604	98.7041	96.6094	48.9397	49.682	53.3304	101.843	105.331	132.479
ARRY-382	73.9258	90.6082	88.5701	106.426	102.736	108.573	123.269	112.306	104.252
Dihydroevocarpine	74.9638	88.7022	95.9489	100.66	103.092	106.019	100.418	121.092	103.944
AT9283	24.9921	31.3329	27.4454	27.6402	31.6913	34.0271	71.3231	96.6603	92.9416
Selumetinib (sulfate)	82.6445	90.6082	93.3257	84.1788	84.9085	84.4053	135.138	120.764	106.814
Carbamazepine	84.6448	85.5884	87.5699	100.786	100.857	103.394	104.676	129.473	135.215
Mutant IDH1-IN-2	70.9441	71.3971	80.6252	101.44	99.8923	95.4345	100.437	97.9705	91.959
Cucurbitacin B	3.7994	5.30911	5.42234	34.7443	38.3885	38.1411	42.1902	51.0919	46.0823
RAF265	45.5242	54.8656	58.6965	86.2211	86.5272	90.6664	85.0611	97.5081	91.3617
Tivozanib	71.85	77.5114	88.589	99.1962	95.2794	95.4848	112.46	115.35	117.046
YS-67	89.608	92.2312	95.3638	112.31	108.175	108.166	112.171	116.776	112.884
Naphazoline (nitrate)	65.5658	92.0613	95.4582	107.458	99.8294	97.8752	110.957	110.745	114.213
Befotertinib	78.4927	85.947	87.7398	85.8395	85.6172	86.6363	116.14	122.306	116.564
Naquotinib (mesylate)	63.0936	58.923	60.8668	63.5545	57.3605	51.0407	57.643	70.0707	79.6468
Bergenin	72.9445	80.5875	86.7207	107.391	105.428	100.534	112.884	119.955	109.839
Tyrphostin AG 528	84.5694	93.1181	97.5907	100.689	106.518	100.064	91.0919	90.7066	104.098
CP681301	53.3182	56.7905	60.6592	102.429	107.177	99.1585	97.8549	107.759	112.421
Thymoquinone	74.2467	82.0594	80.7951	102.505	97.6278	98.0262	92.2865	90.8414	106.93
DS-1-38	68.6452	79.9605	92.7664	95.6173	92.5804	84.4228	113.087	121.422	125.005
Temsirolimus	30.2597	36.5744	45.7902	79.8674	86.7914	85.008	92.511	100.78	102.405
Pz-1	67.5393	75.4408	56.3362	96.5703	99.6507	96.689	96.7821	116.703	124.814
CM-675	43.2098	75.553	76.7711	96.6573	89.0097	100.457	130.437	124.059	69.198
NVP-TAE 226	68.4368	88.9519	80.8741	95.9455	95.1784	95.0242	101.368	74.68	84.6902
Afuresertib (hydrochloride)	47.8256	61.7053	60.8559	92.529	92.45	94.4073	101.974	99.8756	101.244
Ribociclib	59.3974	67.8118	73.0367	75.5414	82.3586	80.8718	85.6689	102.38	96.6411
Sinapinic acid	67.4752	68.9818	82.8134	93.3397	91.9043	92.276	98.5984	108.161	106.917
8-Aminoadenosine	94.6998	110.996	105.422	39.5721	46.0541	55.5008	95.556	102.03	100.577
JNJ-38877618	100.335	110.499	88.5061	100.875	101.597	92.2782	96.9219	95.2963	94.2093
IDH1 Inhibitor 8	94.4967	111.91	98.9237	108.983	117.537	89.9617	98.0858	97.7972	109.321
Gandotinib	80.2613	103.462	87.2165	89.6748	103.648	98.569	95.5945	93.0935	97.5664
Pemigatinib	85.5209	84.8406	82.4646	92.9902	107.973	112.468	93.3436	87.0527	92.3817
SKI-349	62.9493	59.1214	73.763	46.1179	43.8864	58.2637	87.8319	83.6476	76.0485
ENMD-2076	64.7465	58.8675	60.6343	57.1691	71.7058	68.3692	85.8984	88.6976	86.3505
CSF1R-IN-1	93.9078	98.1114	78.3524	103.468	121.692	127.27	97.9127	92.1412	99.2689
Lidocaine	91.8466	96.3751	92.3441	98.0695	88.931	93.8615	106.272	95.7099	86.4082
Cytochalasin E	33.5748	35.3415	32.2751	31.5068	36.3098	36.6818	101.212	111.023	100.096
Procyanidin A1	109.585	81.9773	90.9836	106.029	87.337	88.2615	105.396	104.338	103.492
ROC-325	97.0148	84.3837	87.9578	102.936	95.8486	95.838	105.743	102.395	104.761
SB-633825	75.022	80.7284	88.963	113.828	87.4008	94.8923	96.7487	111.918	104.761
Ruboxistaurin (hydrochloride)	86.7089	92.1817	102.132	84.8399	99.7485	103.871	102.068	102.924	108.301
Pimicotinib	96.1822	97.6342	87.1759	103.818	109.971	95.9124	86.2062	85.4656	90.3424
Sotuletinib (hydrochloride)	103.351	99.8274	83.612	93.5003	104.977	108.43	100.558	98.4032	98.182
PKI-166	95.6542	93.0955	102.62	107.729	100.524	103.871	104.194	98.788	105.425
PCC0208017	99.4415	95.9284	105.046	101.162	113.074	99.7166	90.2078	97.2008	108.705
DS-1001b	134.17	114.588	96.9968	89.9032	112.598	112.002	90.2825	99.3689	101.754
cFMS Receptor Inhibitor IV	114.013	131.516	104.709	93.9601	112.767	73.948	88.2127	103.991	102.803
Erlotinib	99.8427	94.1951	233.099	113.687	113.544	96.6301	97.2342	86.969	88.5097
DL-Sulforaphane N-acetyl-L-cysteine	116.535	106.198	110.061	106.442	118.107	97.0708	92.7606	86.7463	83.2101
DDR2-IN-1	114.131	117.375	115.738	98.3928	114.828	90.6679	110.469	83.043	84.2218
PI4K-IN-1	120.088	105.8	99.0759	113.622	131.729	111.367	211.357	89.9762	79.4697
NBDHEX	128.39	118.629	106.64	107.569	100.972	95.8395	220.629	87.7951	84.3146
Azelnidipine	105.166	101.302	118.348	96.5523	106.027	104.433	144.643	85.02	85.3541
Liensinine	109.029	101.067	111.728	101.918	114.167	117.407	237.855	88.157	90.6537
EGFR-IN-1 (TFA)	119.617	121.71	111.521	99.4427	97.8484	93.0139	105.986	107.212	103.063
Ilorasertib (hydrochloride)	72.6665	66.5175	66.3258	64.5641	70.1892	66.4305	78.3003	106.488	98.1623
NVP-ACC789	90.3907	107.363	100.226	120.686	111.885	99.5593	85.484	97.5033	90.6537
Azithromycin	110.519	98.2354	104.045	101.724	77.5901	98.004	88.0642	92.51	96.8072
UNC4203	114.883	91.3197	106.006	102.813	109.786	91.0049	95.0438	91.0528	98.7934
Fasudil (Hydrochloride)	197.385	122.094	116.328	104.835	119.999	119.597		168.979	155.038
NSC 185058	115.871	97.1885	112.775	103.474	115.307	104.277	77.1308	74.7177	75.2003
ALK-IN-26	105.328	101.111	112.494	112.624	97.2652	112.935	82.9224	86.4586	96.1297
CS640	106.758	99.3413	115.296	102.035	110.693	97.4466		96.1575	82.6903
Leniolisib (phosphate)	106.021	110.575	95.0308	96.6517	92.6778	100.405	89.639	99.1635	93.1168
Fexagratinib	90.3277	120.43	117.598	113.945	105.053	115.515	93.512	98.9856	94.9842
Pyroxamide	108.441	106.595	101.493	108.095	103.005	105.016	108.658	98.8868	98.2347
Aloe emodin	90.5273	115.54	87.0717	104.366	115.282	101.68	101.574	86.1316	94.1345
Fimepinostat	52.3287	57.6431	49.3971	48.659	56.7171	50.094	48.4686	50.3063	54.4856
Levosimendan	104.649	92.7604	114.043	105.801	125.155	106.648	86.5564	110.881	100.132
Autophinib	109.477	89.9036	87.4086	53.5037	77.1136	78.0458	92.8501	86.7441	87.0801
Braftide	114.604	107.593	113.332	104.845	117.833	104.158	112.689	99.7464	88.0286
Lerociclib	86.211	73.9979	62.4834	69.6198	78.9166	72.9068	86.2501	81.5571	82.4463
3,3'-Diindolylmethane	107.681	127.067	107.244	97.1668	108.218	110.401	102.009	102.602	101.841
hVEGF-IN-1	99.0353	87.4086	94.2449	115.601	94.26	119.452	99.8551	104.894	98.4027
GNE-490	78.2269	92.4235	73.1995	68.5282	85.4415	85.7849	72.3785	84.3334	83.9678
JR-AB2-011	107.843	96.9021	94.7564	125.339	106.844	97.9395	96.9602	105.546	107.423
Tyrosine kinase-IN-7	98.0997	88.0697	112.82	88.9002	108.119	106.795	90.6172	107.581	101.149
Alteminostat	40.5772	37.5707	44.2449	30.0041	27.1709	24.4603	39.1912	47.9943	39.7444
Gefitinib	112.196	102.753	96.3906	96.0384	103.888	106.549	90.5974	93.5515	91.9213
Erythromycin Ethylsuccinate	108.105	125.108	109.24	97.9027	105.053	97.1177	98.7584	81.5768	104.084
LY2874455	72.8377	69.1825	71.9769	119.428	102.514	105.531	87.495	85.0546	89.4217
Epertinib (hydrochloride)	121.287	124.109	110.523	90.1872	89.3409	82.5407	100.907	110.277	97.4118
Lenvatinib	107.001	95.3505	84.4489	88.9031	73.5127	96.2189	94.1719	101.889	93.6241
BRD-6929	114.294	96.4744	91.6917	60.214	52.1589	56.5075	95.8627	101.115	101.7
AT-533	60.423	56.9389	55.0783	32.634	29.7835	31.2623	68.1203	78.6996	75.8942
BIX02188	101.032	97.9105	99.4464	104.342	103.895	95.3628	102.881	93.0479	87.182
Genistein	105.615	95.5753	81.9015	95.5573	93.2031	125.725	93.4918	101.436	89.3073
Elenestinib	114.244	111.447	111.422	95.5671	93.67	95.139	94.2853	96.7223	86.313
KG5	102.319	102.094	105.341	92.7166	99.4292	93.5338	95.3149	88.9106	89.5246
MID-1	92.4909	86.9714	92.341	98.7191	90.3818	100.49	63.4352	63.1612	58.7784
Adavosertib	65.3305	66.5418	63.9319	31.6903	23.6644	33.7138	74.4868	74.9402	76.3948
hVEGF-IN-3	97.5483	98.9969	103.555	79.1455	84.7685	82.2197	112.062	102.144	102.777
Lycorine (hydrochloride)	93.1527	85.0608	65.2057	83.5038	97.6489	92.7847	69.1593	69.046	77.5472
U0126-EtOH	90.7551	95.7376	94.0393	105.344	103.846	89.4187	95.551	101.87	94.7481
PQR626	61.1098	62.0713	51.407	61.4884	80.0211	69.0377	81.7601	78.8413	79.427
TIE-2/VEGFR-2 kinase-IN-2	101.582	99.334	96.3995	95.6546	99.4487	78.0462	95.6549	90.2613	90.2991
N6-Isopentenyladenosine	105.515	96.4994	100.008	60.788	52.3048	52.6356	98.9326	95.3621	99.0554
HG6-64-1	67.7906	67.3285	67.416	53.7738	66.2845	82.3267	99.4899	95.5132	92.7456
MCP110	104.829	120.088	109.237	97.4155	99.8962	80.741	94.0302	82.1663	114.528
WAY-600	109.25	108.428	109.101	95.03	99.2871	78.6598	96.8869	98.904
GSK2636771	107.162	109.478	113.321	84.1303	82.6907	107.616	112.987	110.113	111.992
FIIN-1	91.9024	95.2441	99.9316	105.796	109.045	101.796	94.9619	98.4434	90.2094
Pantoprazole	112.968	103.581	104.049	97.539	106.588	120.367	99.3369	107.267	107.654
(Z)-FeCP-oxindole	109.569	104.471	107.516	93.1894	125.128	108.737	101.382	103.463	100.608
PD158780	111.667	95.438	101.312	78.1251	117.745	100.716	82.2977	84.6647	87.4094
AS-605240	95.3581	99.213	84.1241	95.3282	93.2922	79.8321	92.0883	85.3371	92.1067
Icotinib	94.3203	117.096	103.889	103.925	121.045	114.166	96.2882	93.1106	104.099
Foretinib	86.9171	95.4195	100.937	83.8866	95.4595	90.3596	79.2173	72.9946	79.8889
PQR620	27.051	34.6475	31.7036	62.5172	63.389	70.1017	63.3005	63.7455	68.099
CRT0066854	66.1245	92.5167	87.1642	97.421	108.754	107.555	94.1226	100.596	94.8913
N-(p-Coumaroyl) Serotonin	87.0612	96.0165	77.159	110.301	103.861	101.878	97.3675	99.4228	86.2896
Atirmociclib	67.4627	80.1853	95.1312	76.5092	82.3719	80.9662	106.058	77.2428	86.4191
Beauvericin	72.7741	74.5239	76.212	98.6523	107.185	95.612	94.9642	105.589	101.502
Lazertinib	83.6027	97.2723	94.843	75.681	106.76	97.4319	106.592	109.942	115.17
R406 (free base)	57.7046	72.28	79.7735	97.2575	97.9222	110.923	111.617	104.585	103.275
Quisinostat (dihydrochloride)	25.157	30.2213	17.9928	22.3719	32.2121	31.1442	34.7117	38.5553	38.5311
Toyocamycin	27.5862	35.5944	34.0299	34.5005	35.9717	37.4646	64.2067	66.4806	64.3767
NBI-31772	85.2702	83.7056	104.231	100.941	119.368	107.01	97.853	104.407	92.7551
Vorolanib	85.6613	99.3927	92.8873	117.755	104.21	112.993	102.886	92.2695	95.482
Quinacrine (hydrochloride hydrate)	34.4416	34.1122	36.2326	63.7486	63.3672	62.3865	72.5657	73.5367	68.2042
NVS-PI3-4	65.2187	83.788	79.4853	98.0857	104.21	69.5568	82.1304	101.778	82.1304
AGI-6780	60.1132	89.5111	96.7164	99.0011	101.126	106.651	89.4374	90.991	93.2891
PF-04691502	25.5687	26.4745	27.0098	36.8979	42.4228	35.9281	60.792	56.3171	60.8243
PI3K-IN-1	52.2491	73.7005	72.5682	100.919	104.286	114.704	102.295	106.285	92.2776
MC1742	35.6768	37.9619	40.8852	38.8812	35.5576	38.0748	50.1592	46.0404	40.4974
Acrizanib	64.2117	73.7868	91.8045	94.1495	91.6849	91.6946	93.8831	98.7549	84.1489
DC-LC3in-D5	57.7253	71.0275	75.7224	94.3042	99.5909	96.4691	95.1686	95.7182	83.1522
Canertinib	60.6699	82.0852	76.196	72.529	92.6128	79.7584	84.9314	84.4283	82.379
R-268712	53.8746	67.1357	60.1139	94.0335	122.033	95.6572	94.6562	83.1801	99.2765
3PO	50.2093	71.8718	87.9539	88.8435	102.046	87.5967	87.5955	85.6859	97.8234
Elzovantinib	58.6725	60.2375	72.716	82.7352	81.7784	83.837	92.7932	87.6886	85.9653
Mefatinib	37.7102	64.3558	50.6211	53.1314	67.3196	57.3744	82.6305	81.1215	78.2059
Brevianamide F	49.8387	61.7612	72.2424	96.3435	94.8744	94.9614	102.49	102.35	100.711
YS-363	46.1939	55.2749	76.1754	88.1766	98.1121	107.497	98.196	100.329	89.7007
Droxinostat	61.0817	53.9364	87.2743	102.809	105.342	97.3776	97.3762	102.5	100.245
(R)-IHMT-PI3Kδ-372	74.2604	74.7752	84.1444	94.6811	92.6031	92.7191	93.9017	95.2524	96.7428
APG-2449	46.2351	69.0507	75.5165	93.502	91.2887	89.0078	83.767	87.4185	89.9428
KRN-633	59.1255	78.0081	84.4327	106.946	93.8982	97.5902	95.0009	94.0508	97.4508
BMS-37	67.9388	72.7572	82.9295	102.858	77.5451	87.848	94.8798	95.8858	94.0508
Lidocaine (hydrochloride hydrate)	64.1087	67.6711	76.3607	95.6379	95.9182	97.8609	93.9949	95.5039	103.096
BMS-1001 (hydrochloride)	74.3222	73.5809	94.955	96.5754	83.1411	87.8673	91.5823	94.8146	100.786
Nexturastat A	51.4654	66.0855	68.7212	97.3679	99.0303	96.4014	98.2705	95.2897	97.7861
Nedometinib	44.2171	55.6455	61.5965	82.4646	77.7481	72.3067	104.819	105.955	111.6
CAL-130 (Hydrochloride)	66.7163	79.382	87.513	83.613	96.0631	95.1917	96.3394	106.51	99.2679
AR420626	61.1765	89.9255	88.2279	100.633	88.8971	107.104	95.2457	94.6811	97.8125
(E/Z)-Afatinib	46.6791	61.5562	55.4133	64.7384	66.7037	71.3945	91.2675	97.4508	97.1245
PF-04979064	18.3768	18.0418	22.0403	16.7176	17.9877	19.4987	55.632	60.4216	61.0479
LX2343	60.9308	72.4795	81.2807	94.4872	95.2659	90.334	103.943	110.206	97.7154
Dovitinib	58.7417	78.7342	87.4237	67.9089	75.1491	75.2047	113.857	118.294	108.177
Vacuolin-1	72.837	81.0573	87.7811	82.2039	97.3239	82.7786	116.177	121.963	122.008
TG 100713	64.8623	81.5488	81.3701	88.1647	89.1289	95.5533	94.4871	102.126	107.718
mTOR inhibitor-3	24.2071	36.3589	52.353	40.2367	41.859	38.3548	53.1093	57.2109	53.8149
Panobinostat	12.3009	17.3493	24.0284	29.1493	27.7031	28.9546	112.411	106.298	116.953
BEBT-908	65.9792	95.8228	107.662	26.9614	31.4298	27.0078	114.704	104.569	107.436
BRD9757	12.636	17.1482	21.9956	18.5717	20.6854	18.4697	43.4065	37.8319	34.5947
SAR125844	70.0447	80.5659	106.188	89.9168	81.9443	92.355	99.903	102.276	100.318
YM-201636	68.9948	77.7737	74.758	73.054	79.9048	82.9918	87.2629	83.9375	82.0411
UC2288	46.2324	69.5533	80.3202	95.9704	97.5557	98.4827	109.888	107.127	99.3561
Vorasidenib	71.6307	85.7707	83.8273	91.3723	103.526	93.3933	106.395	109.985	104.993
Vps34-IN-1	83.5815	78.7342	93.1646	35.2492	33.7196	32.329	101.376	105.142	100.485
AZD-8055	14.9814	21.4148	20.9457	95.0434	94.8487	94.413	66.3403	62.7415	68.1662
Nur77 modulator 3	73.806	87.9902	75.4248	99.5754	101.36	107.466	89.8911	96.0075	90.8666
WT-161	48.1782	80.1689	90.7149	100.749	102.695	99.4228	87.2742	91.3544	91.1144
TMP195	68.3086	69.4626	79.7201	106.206	112.627	85.5794	98.3302	95.7056	89.2639
Pralsetinib	62.2663	77.5564	77.0115	92.2769	97.0186	104.975	69.8694	62.9323	69.6836
Rociletinib hydrobromide	60.7758	72.3796	89.9936	90.0062	97.6673	95.9309	103.734	98.4231	95.8914
PD1-PDL1-IN 1 (TFA)	45.3254	67.0264	93.4716	73.2624	88.909	98.2398	90.3092	91.4086	98.6167
OSI-027	46.2229	72.027	74.5272	45.7664	55.5264	53.2748	59.7347	71.2398	72.9508
SCR-1481B1 (free base)	74.2708	82.9897	92.3657	80.1984	82.2211	87.0104	78.8505	83.674	94.4281
SYHA1813	93.6992	95.3509	86.9714	113.314	126.203	118.846	126.983	107.674	115.664
SOS1/EGFR-IN-1	91.8989	92.1031	80.7727	100.241	107.881	95.9536	94.455	101.255	108.765
SCR-1481B1	79.9839	114.597	107.145	97.425	108.079	93.9728	96.9873	90.8747	102.925
Luxeptinib	62.8816	76.7732	73.1356	85.3424	101.952	87.2949	98.1662	83.8451	100.426
CDDD11-8	24.9002	26.0695	25.4941	58.2484	57.9372	55.0368	28.6785	31.1017	34.3218
MEK inhibitor	86.3961	90.9153	86.9622	107.683	116.893	97.0996	103.679	93.6909	91.093
AMG-Tie2-1	96.8635	93.3465	116.573	107.286	117.685	102.915	100.655	106.473	102.336
Pictilisib (dimethanesulfonate)	84.2711	74.0357	81.3758	103.028	88.9926	100.778	81.5747	85.406	87.8293
ROS kinases-IN-2	81.3758	78.6198	90.2935	97.8919	94.9349	103.254	96.3215	105.534	89.5212
GW768505A (free base)	101.977	113.725	95.4066	109.083	109.041	88.7521	119.211	110.271	124.745
SB-218078	92.2887	100.102	90.2007	77.3203	80.4471	88.9502	101.102	97.2821	107.39
cis-BG47	123.403	112.574	98.9514	95.1896	112.436	99.6887	102.041	104.53	119.79
Denfivontinib	114.894	54.6135	103.09	99.5473	97.1562	40.5348	93.4289	110.206	114.889
Bosutinib isomer	107.98	107.284	104.992	87.0119	94.7368	82.5552	93.2106	96.518	106.134
Azithromycin (hydrate)	113.994	109.864	115.107	89.3039	106.254	94.1851	95.1535	105.545	114.943
PD-334581	103.044	94.757	93.3836	87.3514	103.664	97.1986	110.959	113.404	112.214
NST-628	66.213	82.044	92.7434	82.1449	87.6203	100.481	99.8035	100.065	110.108
Mobocertinib	83.7236	86.1548	79.158	88.8512	82.4986	91.7233	112.313	103.318	105.916
B-Raf IN 2	94.2044	78.2243	104.41	121.725	119.192	108.487	127.522	118.773	102.944
Sitagliptin (phosphate)	98.8472	112.046	107.393	109.585	106.394	122.028	107.1	109.313	107.998
GSK3179106	92.3325	91.5499	110.999	112.978	94.8616	108.504	89.4755	94.435	93.3282
Lavendustin C	96.4782	107.012	88.3348	131.197	118.854	109.551	101.389	95.2285	120.777
MRX-2843	74.5122	78.1397	82.2008	94.1187	107.086	107.001	82.2399	86.5938	73.0937
UNC2881	96.5311	100.91	105.817	107.846	119.985	90.0327	85.4766	79.4835	76.3617
HDAC/JAK/BRD4-IN-1	67.8811	72.5134	63.7883	100.281	119.8	118.5	88.8908	97.4106	89.1519
Autogramin-2	84.5698	86.3254	86.4523	114.836	93.7135	105.752	51.8046	49.0795	46.3544
Tyrphostin AG 112	93.3795	87.6791	95.5793	113.451	102.274	93.0887	93.7041	104.907	100.271
CDK4/6-IN-2	75.1785	71.3923	58.2677	103.54	106.09	114.194	106.881	96.2413	100.282
Chromeceptin	39.3369	70.9587	45.8199	101.987	79.8346	91.3497	81.9894	85.2156	78.3037
(E/Z)-Zotiraciclib (citrate)	48.3052	47.9351	48.5379	70.4131	65.179	69.5689	47.0853	51.6375	55.0413
Hypocrellin A	115.948	121.31	97.5887		60.1981	41.7773	59.1237	64.4068	89.2249
Flumatinib	102.031	95.9283	104.347	89.3067	86.1831	95.672	91.5115	-7.09285	90.0498
Crizotinib	101.512	86.5898	87.9329	86.6727	80.8814	90.6574	79.1077	86.8444	89.9662
UNC1062	117.894	153.598	128.354	114.819	109.737	105.296	91.8665	99.384	102.266
MK-8033	129.644	87.9964	91.3701	94.0849	111.391	103.641	92.5974	94.8317	89.131
DMH4	101.724	90.8519	81.3548	109.281	111.459	94.1693	107.455	95.2494	111.078
Edicotinib	142.013	104.56	121.669	117.725	121.765	120.611	103.455	99.7412	101.619
Lapatinib (ditosylate)	112	122.904	107.171		98.2249	99.6939	97.7272	106.161	80.3769
PI3Kα-IN-11	97.8185	92.7598	99.8834	106.602	105.833	103.594	93.4788	92.6291	86.5449
Diosgenin glucoside	91.6563	100.353	119.703	101.355	118.512	105.378	92.4298	98.5768	85.7058
AZD3229	119.878	99.8943	99.9381	89.8126	109.698	104.154	86.1673	89.9332	86.4086
c-Kit-IN-5-1	109.083	110.842	104.134	99.7989	117.673	114.367	86.7338	93.1955	94.9893
Neladalkib (TFA)	92.7926	96.8351	101.02	106.847	116.274	99.2217	96.6677	93.1641	93.4473
PB94	107.739	101.14	102.975	111.272	98.2423	100.813	88.3912	109.035	92.157
